# Supplementary material for: A Chromosome-Scale Assembly of the Asian Honeybee Apis cerana Genome
Source: Front Genet. 2020 Mar 27;11:279. doi: 10.3389/fgene.2020.00279 (PMC7119468; doi:10.3389/fgene.2020.00279)
Supplement: TABLE S6 — The list of Pfam family domains identified in A. cerana and A. mellifera. [file Table_6.XLSX]

## Sheet: A cerana unique
pfam ID	pfam description	Apis cerana	Apis mellifera
PF00445	Ribonuclease T2 family	1	0
PF00665	Integrase core domain	1	0
PF00703	Glycosyl hydrolases family 2	1	0
PF00880	Nebulin repeat	1	0
PF01359	Transposase (partial DDE domain)	4	0
PF01946	Thi4 family	1	0
PF03670	Uncharacterised protein family (UPF0184)	1	0
PF03941	Inner centromere protein, ARK binding region	1	0
PF04087	Domain of unknown function (DUF389)	1	0
PF05350	Glycogen synthase kinase-3 binding	1	0
PF05768	Glutaredoxin-like domain (DUF836)	1	0
PF07061	Swi5	1	0
PF07727	Reverse transcriptase (RNA-dependent DNA polymerase)	1	0
PF08783	DWNN domain	1	0
PF09346	SMI1 / KNR4 family (SUKH-1)	1	0
PF10178	Proteasome assembly chaperone 3	1	0
PF10181	GPI-GlcNAc transferase complex, PIG-H component	1	0
PF10214	RNA polymerase I-specific transcription-initiation factor	1	0
PF10699	Male gamete fusion factor	1	0
PF11111	Centromere protein M (CENP-M)	1	0
PF11568	Mediator complex subunit 29	1	0
PF12718	Tropomyosin like	1	0
PF13207	AAA domain	2	0
PF13364	Beta-galactosidase jelly roll domain	1	0
PF13412	Winged helix-turn-helix DNA-binding	1	0
PF13465	Zinc-finger double domain	1	0
PF13517	Repeat domain in Vibrio, Colwellia, Bradyrhizobium and Shewanella	1	0
PF13606	Ankyrin repeat	1	0
PF14161	Centrosome-associated N terminus	1	0
PF14223	gag-polypeptide of LTR copia-type	5	0
PF14529	Endonuclease-reverse transcriptase	2	0
PF14634	zinc-RING finger domain	1	0
PF14989	Coiled-coil domain containing 32	1	0
PF15084	Domain of unknown function (DUF4550)	1	0
PF15539	CAF1 complex subunit p150, region binding to CAF1-p60 at C-term	1	0
PF15874	Putative Interleukin 2 receptor, gamma chain	1	0
PF15879	NADH-ubiquinone oxidoreductase MWFE subunit	1	0
PF15888	Folded gastrulation N-terminus	1	0
PF16565	Phospholipase D-like domain at C-terminus of MIT	1	0
PF17177	Pentacotripeptide-repeat region of PRORP	1	0
PF17211	VHL box domain	1	0
PF17213	Hydin Adenylate kinase-like domain	1	0
PF17283	SprT-like zinc ribbon domain	1	0

## Sheet: A mellifera unique
pfam ID	pfam description	Apis cerana	Apis mellifera
PF00032	Cytochrome b(C-terminal)/b6/petD	0	1
PF00033	Cytochrome b/b6/petB	0	1
PF00049	Insulin/IGF/Relaxin family	0	1
PF00115	Cytochrome C and Quinol oxidase polypeptide I	0	1
PF00116	Cytochrome C oxidase subunit II, periplasmic domain	0	1
PF00119	ATP synthase A chain	0	1
PF00146	NADH dehydrogenase	0	1
PF00205	Thiamine pyrophosphate enzyme, central domain	0	1
PF00219	Insulin-like growth factor binding protein	0	1
PF00303	Thymidylate synthase	0	1
PF00361	Proton-conducting membrane transporter	0	3
PF00386	C1q domain	0	1
PF00444	Ribosomal protein L36	0	1
PF00447	HSF-type DNA-binding	0	2
PF00507	NADH-ubiquinone/plastoquinone oxidoreductase, chain 3	0	1
PF00510	Cytochrome c oxidase subunit III	0	1
PF00619	Caspase recruitment domain	0	1
PF00634	BRCA2 repeat	0	1
PF00701	Dihydrodipicolinate synthetase family	0	1
PF00807	Apidaecin	0	1
PF00832	Ribosomal L39 protein	0	1
PF00931	NB-ARC domain	0	1
PF00965	Tissue inhibitor of metalloproteinase	0	1
PF01147	Crustacean CHH/MIH/GIH neurohormone family	0	1
PF01222	Ergosterol biosynthesis ERG4/ERG24 family	0	1
PF01283	Ribosomal protein S26e	0	1
PF01382	Avidin family	0	1
PF01636	Phosphotransferase enzyme family	0	1
PF01648	4'-phosphopantetheinyl transferase superfamily	0	1
PF01759	UNC-6/NTR/C345C module	0	1
PF01773	Na+ dependent nucleoside transporter N-terminus	0	1
PF01803	LIM-domain binding protein	0	1
PF01876	RNase P subunit p30	0	1
PF01938	TRAM domain	0	1
PF01951	Archease protein family (MTH1598/TM1083)	0	1
PF01990	ATP synthase (F/14-kDa) subunit	0	1
PF02033	Ribosome-binding factor A	0	1
PF02185	Hr1 repeat	0	1
PF02191	Olfactomedin-like domain	0	1
PF02208	Sorbin homologous domain	0	1
PF02245	Methylpurine-DNA glycosylase (MPG)	0	1
PF02256	Iron hydrogenase small subunit	0	1
PF02391	MoaE protein	0	1
PF02475	Met-10+ like-protein	0	1
PF02536	mTERF	0	1
PF02597	ThiS family	0	1
PF02743	Cache domain	0	1
PF02776	Thiamine pyrophosphate enzyme, N-terminal TPP binding domain	0	1
PF02790	Cytochrome C oxidase subunit II, transmembrane domain	0	1
PF02792	Mago nashi protein	0	1
PF02888	Calmodulin binding domain	0	1
PF02935	Cytochrome c oxidase subunit VIIc	0	1
PF03147	Ferredoxin-fold anticodon binding domain	0	1
PF03184	DDE superfamily endonuclease	0	1
PF03232	Ubiquinone biosynthesis protein COQ7	0	1
PF03568	Peptidase family C50	0	1
PF03604	DNA directed RNA polymerase, 7 kDa subunit	0	1
PF03638	Tesmin/TSO1-like CXC domain, cysteine-rich domain	0	1
PF03690	Uncharacterised protein family (UPF0160)	0	1
PF03726	Polyribonucleotide nucleotidyltransferase, RNA binding domain	0	1
PF03801	HEC/Ndc80p family	0	1
PF03813	Nrap protein domain 1	0	1
PF03859	CG-1 domain	0	1
PF04005	Hus1-like protein	0	1
PF04045	Arp2/3 complex, 34 kD subunit p34-Arc	0	1
PF04135	Nucleolar RNA-binding protein, Nop10p family	0	1
PF04136	Sec34-like family	0	1
PF04139	Rad9	0	1
PF04152	Mre11 DNA-binding presumed domain	0	1
PF04176	TIP41-like family	0	1
PF04188	Mannosyltransferase (PIG-V)	0	1
PF04189	Gcd10p family	0	1
PF04597	Ribophorin I	0	1
PF04627	Mitochondrial ATP synthase epsilon chain	0	1
PF04724	Glycosyltransferase family 17	0	1
PF04736	Eclosion hormone	0	1
PF04882	Peroxin-3	0	1
PF05162	Ribosomal protein L41	0	1
PF05180	DNL zinc finger	0	1
PF05208	ALG3 protein	0	1
PF05285	SDA1	0	1
PF05348	Proteasome maturation factor UMP1	0	1
PF05375	Pacifastin inhibitor (LCMII)	0	1
PF05434	TMEM9	0	1
PF05473	UL45 protein, carbohydrate-binding C-type lectin-like	0	1
PF05620	Protein of unknown function (DUF788)	0	1
PF05786	Condensin complex subunit 2	0	2
PF05835	Synaphin protein	0	1
PF06008	Laminin Domain I	0	1
PF06080	Protein of unknown function (DUF938)	0	1
PF06090	Inositol-pentakisphosphate 2-kinase	0	1
PF06179	Surfeit locus protein 5 subunit 22 of Mediator complex	0	1
PF06211	BMP and activin membrane-bound inhibitor (BAMBI) N-terminal domain	0	1
PF06239	Evolutionarily conserved signalling intermediate in Toll pathway	0	1
PF06293	Lipopolysaccharide kinase (Kdo/WaaP) family	0	1
PF06331	Transcription factor TFIIH complex subunit Tfb5	0	1
PF06345	DRF Autoregulatory Domain	0	1
PF06423	GWT1	0	1
PF06432	Phosphatidylinositol N-acetylglucosaminyltransferase	0	1
PF06524	NOA36 protein	0	1
PF06581	Mad1 and Cdc20-bound-Mad2 binding	0	1
PF06624	Ribosome associated membrane protein RAMP4	0	1
PF06632	DNA double-strand break repair and V(D)J recombination protein XRCC4	0	1
PF06652	Methuselah N-terminus	0	1
PF06726	Bladder cancer-related protein BC10	0	1
PF06743	FAST kinase-like protein, subdomain 1	0	1
PF06814	Lung seven transmembrane receptor	0	1
PF06842	Protein of unknown function (DUF1242)	0	1
PF06888	Putative Phosphatase	0	1
PF07084	Thyroid hormone-inducible hepatic protein Spot 14	0	1
PF07225	NADH-ubiquinone oxidoreductase B15 subunit (NDUFB4)	0	1
PF07443	HepA-related protein (HARP)	0	1
PF07522	DNA repair metallo-beta-lactamase	0	1
PF07539	Down-regulated in metastasis	0	1
PF07544	RNA polymerase II transcription mediator complex subunit 9	0	1
PF07546	EMI domain	0	1
PF07719	Tetratricopeptide repeat	0	2
PF07722	Peptidase C26	0	1
PF07749	Endoplasmic reticulum protein ERp29, C-terminal domain	0	1
PF07757	Predicted AdoMet-dependent methyltransferase	0	1
PF07778	Mis6	0	1
PF07801	Protein of unknown function (DUF1647)	0	1
PF07810	TMC domain	0	2
PF07850	Renin receptor-like protein	0	1
PF07888	Calcium binding and coiled-coil domain (CALCOCO1) like	0	1
PF07912	ERp29, N-terminal domain	0	1
PF07928	Vps54-like protein	0	1
PF07942	N2227-like protein	0	1
PF07985	SRR1	0	1
PF07986	Tubulin binding cofactor C	0	1
PF08016	Polycystin cation channel	0	1
PF08022	FAD-binding domain	0	2
PF08026	Bee antimicrobial peptide	0	1
PF08030	Ferric reductase NAD binding domain	0	2
PF08038	TOM7 family	0	1
PF08040	MNLL subunit	0	1
PF08069	Ribosomal S13/S15 N-terminal domain	0	1
PF08144	CPL (NUC119) domain	0	1
PF08155	NOGCT (NUC087) domain	0	1
PF08158	NUC130/3NT domain	0	1
PF08161	NUC173 domain	0	1
PF08163	NUC194 domain	0	1
PF08164	Apoptosis-antagonizing transcription factor, C-terminal	0	1
PF08167	rRNA processing/ribosome biogenesis	0	1
PF08170	POPLD (NUC188) domain	0	1
PF08208	DNA-directed RNA polymerase I subunit RPA34.5	0	1
PF08213	Mitochondrial domain of unknown function (DUF1713)	0	1
PF08245	Mur ligase middle domain	0	1
PF08285	Dolichol-phosphate mannosyltransferase subunit 3 (DPM3)	0	1
PF08373	RAP domain	0	1
PF08451	Adenosine/AMP deaminase N-terminal	0	1
PF08543	Phosphomethylpyrimidine kinase	0	1
PF08551	Eukaryotic integral membrane protein (DUF1751)	0	1
PF08596	Lethal giant larvae(Lgl) like, C-terminal	0	1
PF08617	Kinase binding protein CGI-121	0	1
PF08685	GON domain	0	1
PF08695	Cytochrome oxidase complex assembly protein 1	0	1
PF08768	Domain of unknown function (DUF1794)	0	1
PF08828	Doublesex dimerisation domain	0	1
PF08996	DNA Polymerase alpha zinc finger	0	1
PF08997	Ubiquinol-cytochrome C reductase complex, 6.4kD protein	0	1
PF09058	L27_1	0	1
PF09072	Translation machinery associated TMA7	0	1
PF09165	Ubiquinol-cytochrome c reductase 8 kDa, N-terminal	0	1
PF09262	Peroxisome biogenesis factor 1, N-terminal	0	1
PF09271	LAG1, DNA binding	0	1
PF09302	XLF-Cernunnos, XRcc4-like factor, NHEJ component	0	1
PF09329	Primase zinc finger	0	1
PF09332	Mcm10 replication factor	0	1
PF09371	Tex-like protein N-terminal domain	0	1
PF09402	Man1-Src1p-C-terminal domain	0	1
PF09465	Lamin-B receptor of TUDOR domain	0	1
PF09494	Slx4 endonuclease	0	1
PF09495	Protein of unknown function (DUF2462)	0	1
PF09531	Nucleoporin protein Ndc1-Nup	0	1
PF09596	MamL-1 domain	0	1
PF09754	PAC2 family	0	1
PF09801	Integral membrane protein S linking to the trans Golgi network	0	1
PF09805	Nucleolar protein 12 (25kDa)	0	1
PF09807	Elongation complex protein 6	0	1
PF09808	Small nuclear RNA activating complex (SNAPc), subunit SNAP43	0	1
PF09814	HECT-like Ubiquitin-conjugating enzyme (E2)-binding	0	1
PF09976	Tetratricopeptide repeat-like domain	0	1
PF10161	Putative mitochondrial precursor protein	0	1
PF10164	Uncharacterized conserved protein (DUF2367)	0	1
PF10177	Uncharacterised conserved protein (DUF2371)	0	1
PF10185	Chaperone for wingless signalling and trafficking of LDL receptor	0	1
PF10193	Telomere length regulation protein	0	1
PF10210	Mitochondrial 28S ribosomal protein S32	0	1
PF10213	Mitochondrial ribosomal subunit protein	0	1
PF10215	Oligosaccaryltransferase	0	1
PF10217	Uncharacterized conserved protein (DUF2039)	0	1
PF10225	NEMP family	0	1
PF10236	Mitochondrial ribosomal death-associated protein 3	0	1
PF10244	Mitochondrial ribosomal subunit	0	1
PF10260	Uncharacterized conserved domain (SAYSvFN)	0	1
PF10261	Inositol phospholipid synthesis and fat-storage-inducing TM	0	1
PF10288	Cytoplasmic tRNA 2-thiolation protein 2	0	1
PF10296	Maintenance of mitochondrial morphology protein 1	0	1
PF10376	Double-strand recombination repair protein	0	1
PF10441	Urb2/Npa2 family	0	1
PF10453	Nuclear fragile X mental retardation-interacting protein 1 (NUFIP1)	0	1
PF10496	SNARE-complex protein Syntaxin-18 N-terminus	0	1
PF10504	Protein of unknown function (DUF2452)	0	1
PF10505	NMDA receptor-regulated gene protein 2 C-terminus	0	1
PF10524	Nuclear factor I protein pre-N-terminus	0	1
PF10571	Uncharacterised protein family UPF0547	0	1
PF11510	Fanconi Anaemia group E protein FANCE	0	1
PF11581	Antagonist of EGFR signalling, Argos	0	1
PF11635	Mediator complex subunit 16	0	1
PF11715	Nucleoporin Nup120/160	0	1
PF11719	DNA replication and checkpoint protein	0	1
PF11822	Domain of unknown function (DUF3342)	0	1
PF11968	25S rRNA (adenine(2142)-N(1))-methyltransferase, Bmt2	0	1
PF12004	Domain of unknown function (DUF3498)	0	1
PF12254	DNA polymerase alpha subunit p180 N terminal	0	1
PF12309	KIF-1 binding protein C terminal	0	1
PF12328	Rpp20 subunit of nuclear RNase MRP and P	0	1
PF12329	TATA element modulatory factor 1 DNA binding	0	1
PF12333	Rix1 complex component involved in 60S ribosome maturation	0	1
PF12424	Plasma membrane calcium transporter ATPase C terminal	0	1
PF12530	Protein of unknown function (DUF3730)	0	1
PF12554	Mitotic-spindle organizing gamma-tubulin ring associated	0	1
PF12578	Myotubularin-associated protein	0	1
PF12597	Protein of unknown function (DUF3767)	0	1
PF12605	Casein kinase 1 gamma C terminal	0	1
PF12612	Tubulin folding cofactor D C terminal	0	1
PF12657	Transcription factor IIIC subunit delta N-term	0	1
PF12660	Putative zinc-finger of transcription factor IIIC complex	0	1
PF12689	Acid Phosphatase	0	1
PF12813	XPG domain containing	0	1
PF12877	Domain of unknown function (DUF3827)	0	1
PF13041	PPR repeat family	0	3
PF13167	GTP-binding GTPase N-terminal	0	1
PF13181	Tetratricopeptide repeat	0	1
PF13191	AAA ATPase domain	0	1
PF13271	Domain of unknown function (DUF4062)	0	1
PF13339	Apoptosis antagonizing transcription factor	0	1
PF13616	PPIC-type PPIASE domain	0	1
PF13672	Protein phosphatase 2C	0	1
PF13768	von Willebrand factor type A domain	0	1
PF13842	DDE_Tnp_1-like zinc-ribbon	0	2
PF13922	PHD domain of transcriptional enhancer, Asx	0	1
PF13932	GidA associated domain	0	1
PF13934	Nuclear pore complex assembly	0	1
PF14226	non-haem dioxygenase in morphine synthesis N-terminal	0	1
PF14291	Domain of unknown function (DUF4371)	0	1
PF14437	MafB19-like deaminase	0	1
PF14630	Origin recognition complex (ORC) subunit 5 C-terminus	0	1
PF14640	Transmembrane protein 223	0	1
PF14713	Domain of unknown function (DUF4464)	0	1
PF14744	WASH complex subunit 7	0	1
PF14745	WASH complex subunit 7, N-terminal	0	1
PF14746	WASH complex subunit 7, C-terminal	0	1
PF14761	Hermansky-Pudlak syndrome 3	0	1
PF14762	Hermansky-Pudlak syndrome 3, middle region	0	1
PF14763	Hermansky-Pudlak syndrome 3, C-terminal	0	1
PF14846	Domain of unknown function (DUF4485)	0	1
PF14875	N-term cysteine-rich ER, FAM69	0	1
PF14916	Coiled-coil domain of unknown function	0	1
PF14935	Transmembrane protein 138	0	1
PF14960	ATP synthase regulation	0	1
PF14961	Broad-minded protein	0	1
PF14966	DNA repair REX1-B	0	1
PF14990	Domain of unknown function (DUF4516)	0	1
PF15002	ERK and JNK pathways, inhibitor	0	1
PF15004	Myeloma-overexpressed-like	0	1
PF15009	Transmembrane protein 173	0	1
PF15011	Casein Kinase 2 substrate	0	1
PF15061	Domain of unknown function (DUF4538)	0	1
PF15072	Domain of unknown function (DUF4539)	0	1
PF15074	Domain of unknown function (DUF4541)	0	1
PF15249	Conserved region of unknown function on GLTSCR protein	0	1
PF15279	Sine oculis-binding protein	0	1
PF15311	Hydrolethalus syndrome protein 1 C-terminus	0	1
PF15365	Proline-rich nuclear receptor coactivator motif	0	1
PF15393	Domain of unknown function (DUF4615)	0	1
PF15501	Nuclear protein MDM1	0	1
PF15503	Protein phosphatase 1 regulatory subunit 35 C-terminus	0	1
PF15719	Domain of unknown function (DUF4674)	0	1
PF15749	MRN-interacting protein	0	1
PF15786	PET assembly of cytochrome c oxidase, mitochondrial	0	1
PF15904	LKB1 serine/threonine kinase interacting protein 1	0	1
PF15908	Hyaluronan mediated motility receptor C-terminal	0	1
PF15911	WD domain, G-beta repeat	0	1
PF15949	Domain of unknown function (DUF4757)	0	1
PF15990	UPF0767 family	0	1
PF16001	Domain of unknown function (DUF4775)	0	1
PF16025	Calcium-dependent calmodulin binding	0	1
PF16037	Domain of unknown function (DUF4790)	0	1
PF16045	LisH	0	1
PF16058	Mucin-like	0	1
PF16065	Domain of unknown function (DUF4807)	0	1
PF16091	Domain of unknown function (DUF4820)	0	1
PF16360	GTP-binding GTPase Middle Region	0	1
PF16523	betaPIX coiled coil	0	1
PF16534	Ubiquitin-like oligomerisation domain of SATB	0	1
PF16577	UBA domain	0	1
PF16652	Pleckstrin homology domain	0	1
PF16685	zinc RING finger of MSL2	0	1
PF16752	Tubulin-specific chaperone C N-terminal domain	0	1
PF16858	Condensin II complex subunit CAP-H2 or CNDH2, C-term	0	1
PF16885	Voltage-gated calcium channel subunit alpha, C-term	0	1
PF16975	Ly6/PLAUR domain-containing protein 6, Lypd6	0	1
PF17034	Zinc-ribbon like family	0	1
PF17065	Putative cytokine, C6ORF120	0	1
PF17215	S1 domain	0	1
PF17308	Pro-corazonin	0	1
PF17403	Nrap protein PAP/OAS-like domain	0	1
PF17404	Nrap protein domain 3	0	1
PF17405	Nrap protein nucleotidyltransferase domain 4	0	1
PF17406	Nrap protein PAP/OAS1-like domain 5	0	1
PF17407	Nrap protein domain 6	0	1
PF17454	Honey bee toxin	0	2

## Sheet: A cerana & A mellifera
pfam ID	pfam description	Apis cerana	Apis mellifera	Apis cerana/Apis mellifera
PF12895	Anaphase-promoting complex, cyclosome, subunit 3	2	6	0.333333
PF00398	Ribosomal RNA adenine dimethylase	1	3	0.333333
PF01087	Galactose-1-phosphate uridyl transferase, N-terminal domain	1	3	0.333333
PF01416	tRNA pseudouridine synthase	1	3	0.333333
PF02187	Growth-Arrest-Specific Protein 2 Domain	1	3	0.333333
PF02732	ERCC4 domain	1	3	0.333333
PF03099	Biotin/lipoate A/B protein ligase family	1	3	0.333333
PF03167	Uracil DNA glycosylase superfamily	1	3	0.333333
PF03920	Groucho/TLE N-terminal Q-rich domain	1	3	0.333333
PF04757	Pex2 / Pex12 amino terminal region	1	3	0.333333
PF05699	hAT family C-terminal dimerisation region	1	3	0.333333
PF06297	PET Domain	1	3	0.333333
PF10269	Transmembrane Fragile-X-F protein	1	3	0.333333
PF11671	Complementary sex determiner protein	1	3	0.333333
PF12872	OST-HTH/LOTUS domain	1	3	0.333333
PF14845	beta-acetyl hexosaminidase like	1	3	0.333333
PF16470	Peptidase S8 pro-domain	1	3	0.333333
PF16589	BRCT domain, a BRCA1 C-terminus domain	1	3	0.333333
PF05485	THAP domain	3	8	0.375
PF03456	uDENN domain	2	5	0.4
PF00533	BRCA1 C Terminus (BRCT) domain	3	7	0.428571
PF03062	MBOAT, membrane-bound O-acyltransferase family	3	7	0.428571
PF00487	Fatty acid desaturase	5	11	0.454545
PF02949	7tm Odorant receptor	63	137	0.459854
PF01395	PBP/GOBP family	10	20	0.5
PF07686	Immunoglobulin V-set domain	10	20	0.5
PF08395	7tm Chemosensory receptor	6	12	0.5
PF00538	linker histone H1 and H5 family	3	6	0.5
PF01694	Rhomboid family	3	6	0.5
PF00288	GHMP kinases N terminal domain	2	4	0.5
PF00488	MutS domain V	2	4	0.5
PF00751	DM DNA binding domain	2	4	0.5
PF02902	Ulp1 protease family, C-terminal catalytic domain	2	4	0.5
PF03901	Alg9-like mannosyltransferase family	2	4	0.5
PF04488	Glycosyltransferase sugar-binding region containing DXD motif	2	4	0.5
PF05192	MutS domain III	2	4	0.5
PF08344	Transient receptor ion channel II	2	4	0.5
PF08473	Neuronal voltage-dependent calcium channel alpha 2acd	2	4	0.5
PF13306	Leucine rich repeats (6 copies)	2	4	0.5
PF13688	Metallo-peptidase family M12	2	4	0.5
PF13847	Methyltransferase domain	2	4	0.5
PF16213	Dimerisation and cyclophilin-binding domain of Mon2	2	4	0.5
PF00034	Cytochrome c	1	2	0.5
PF00098	Zinc knuckle	1	2	0.5
PF00147	Fibrinogen beta and gamma chains, C-terminal globular domain	1	2	0.5
PF00253	Ribosomal protein S14p/S29e	1	2	0.5
PF00465	Iron-containing alcohol dehydrogenase	1	2	0.5
PF00612	IQ calmodulin-binding motif	1	2	0.5
PF00659	POLO box duplicated region	1	2	0.5
PF00682	HMGL-like	1	2	0.5
PF00733	Asparagine synthase	1	2	0.5
PF00773	RNB domain	1	2	0.5
PF00779	BTK motif	1	2	0.5
PF00919	Uncharacterized protein family UPF0004	1	2	0.5
PF00956	Nucleosome assembly protein (NAP)	1	2	0.5
PF01097	Arthropod defensin	1	2	0.5
PF01111	Cyclin-dependent kinase regulatory subunit	1	2	0.5
PF01150	GDA1/CD39 (nucleoside phosphatase) family	1	2	0.5
PF01176	Translation initiation factor 1A / IF-1	1	2	0.5
PF01200	Ribosomal protein S28e	1	2	0.5
PF01212	Beta-eliminating lyase	1	2	0.5
PF01255	Putative undecaprenyl diphosphate synthase	1	2	0.5
PF01406	tRNA synthetases class I (C) catalytic domain	1	2	0.5
PF01409	tRNA synthetases class II core domain (F)	1	2	0.5
PF01442	Apolipoprotein A1/A4/E domain	1	2	0.5
PF01633	Choline/ethanolamine kinase	1	2	0.5
PF01746	tRNA (Guanine-1)-methyltransferase	1	2	0.5
PF01794	Ferric reductase like transmembrane component	1	2	0.5
PF01842	ACT domain	1	2	0.5
PF02046	Cytochrome c oxidase subunit VIa	1	2	0.5
PF02089	Palmitoyl protein thioesterase	1	2	0.5
PF02135	TAZ zinc finger	1	2	0.5
PF02142	MGS-like domain	1	2	0.5
PF02167	Cytochrome C1 family	1	2	0.5
PF02172	KIX domain	1	2	0.5
PF02182	SAD/SRA domain	1	2	0.5
PF02188	GoLoco motif	1	2	0.5
PF02351	GDNF/GAS1 domain	1	2	0.5
PF02887	Pyruvate kinase, alpha/beta domain	1	2	0.5
PF02892	BED zinc finger	1	2	0.5
PF02939	UcrQ family	1	2	0.5
PF03155	ALG6, ALG8 glycosyltransferase family	1	2	0.5
PF03221	Tc5 transposase DNA-binding domain	1	2	0.5
PF03803	Scramblase	1	2	0.5
PF04419	4F5 protein family	1	2	0.5
PF04494	WD40 associated region in TFIID subunit, NTD2 domain	1	2	0.5
PF04500	FLYWCH zinc finger domain	1	2	0.5
PF04566	RNA polymerase Rpb2, domain 4	1	2	0.5
PF04567	RNA polymerase Rpb2, domain 5	1	2	0.5
PF04670	Gtr1/RagA G protein conserved region	1	2	0.5
PF04756	OST3 / OST6 family, transporter family	1	2	0.5
PF04777	Erv1 / Alr family	1	2	0.5
PF04791	LMBR1-like membrane protein	1	2	0.5
PF04900	Fcf1	1	2	0.5
PF04923	Ninjurin	1	2	0.5
PF05071	NADH ubiquinone oxidoreductase subunit NDUFA12	1	2	0.5
PF05195	Aminopeptidase P, N-terminal domain	1	2	0.5
PF05207	CSL zinc finger	1	2	0.5
PF05729	NACHT domain	1	2	0.5
PF06151	Trehalose receptor	1	2	0.5
PF06237	Protein of unknown function (DUF1011)	1	2	0.5
PF06544	Protein of unknown function (DUF1115)	1	2	0.5
PF06916	Protein of unknown function (DUF1279)	1	2	0.5
PF07304	Steroid receptor RNA activator (SRA1)	1	2	0.5
PF07464	Apolipophorin-III precursor (apoLp-III)	1	2	0.5
PF07651	ANTH domain	1	2	0.5
PF07859	alpha/beta hydrolase fold	1	2	0.5
PF07965	Integrin beta tail domain	1	2	0.5
PF08547	Complex I intermediate-associated protein 30 (CIA30)	1	2	0.5
PF08686	PLAC (protease and lacunin) domain	1	2	0.5
PF08699	Argonaute linker 1 domain	1	2	0.5
PF08784	Replication protein A C terminal	1	2	0.5
PF09446	VMA21-like domain	1	2	0.5
PF09791	Oxidoreductase-like protein, N-terminal	1	2	0.5
PF09799	Predicted membrane protein	1	2	0.5
PF09995	Uncharacterized protein conserved in bacteria (DUF2236)	1	2	0.5
PF10350	Putative death-receptor fusion protein (DUF2428)	1	2	0.5
PF10509	Galactokinase galactose-binding signature	1	2	0.5
PF10585	Ubiquitin-activating enzyme active site	1	2	0.5
PF11977	Zc3h12a-like Ribonuclease NYN domain	1	2	0.5
PF12260	Protein-kinase domain of FAM69	1	2	0.5
PF12278	Sex determination protein N terminal	1	2	0.5
PF12409	P5-type ATPase cation transporter	1	2	0.5
PF12444	Sox developmental protein N terminal	1	2	0.5
PF12456	Inositol phosphatase	1	2	0.5
PF12678	RING-H2 zinc finger domain	1	2	0.5
PF12706	Beta-lactamase superfamily domain	1	2	0.5
PF12717	non-SMC mitotic condensation complex subunit 1	1	2	0.5
PF13238	AAA domain	1	2	0.5
PF13450	NAD(P)-binding Rossmann-like domain	1	2	0.5
PF13863	Domain of unknown function (DUF4200)	1	2	0.5
PF13891	Potential DNA-binding domain	1	2	0.5
PF13898	Domain of unknown function (DUF4205)	1	2	0.5
PF13899	Thioredoxin-like	1	2	0.5
PF13921	Myb-like DNA-binding domain	1	2	0.5
PF13931	Kinesin-associated microtubule-binding	1	2	0.5
PF14661	HAUS augmin-like complex subunit 6 N-terminus	1	2	0.5
PF14843	Growth factor receptor domain IV	1	2	0.5
PF14853	Fis1 C-terminal tetratricopeptide repeat	1	2	0.5
PF15787	Domain of unknown function (DUF4704)	1	2	0.5
PF15868	Transcription activator MBF2	1	2	0.5
PF15884	Protein QIL1	1	2	0.5
PF15950	Putative sperm flagellar membrane protein	1	2	0.5
PF15993	Fuseless	1	2	0.5
PF16033	Domain of unknown function (DUF4789)	1	2	0.5
PF16041	Domain of unknown function (DUF4793)	1	2	0.5
PF16165	Ferlin C-terminus	1	2	0.5
PF16177	Acetyl-coenzyme A synthetase N-terminus	1	2	0.5
PF16187	Middle or third domain of peptidase_M16	1	2	0.5
PF16486	N-terminal domain of argonaute	1	2	0.5
PF16488	Argonaute linker 2 domain	1	2	0.5
PF16493	N-terminal of Homeobox Meis and PKNOX1	1	2	0.5
PF16511	N-terminal or F0 domain of Talin-head FERM	1	2	0.5
PF16540	Arf6-interacting domain of mitotic kinesin-like protein 1	1	2	0.5
PF16984	Group 7 allergen	1	2	0.5
PF01826	Trypsin Inhibitor like cysteine rich domain	6	11	0.545455
PF05773	RWD domain	4	7	0.571429
PF05986	ADAM-TS Spacer 1	4	7	0.571429
PF00036	EF hand	3	5	0.6
PF00294	pfkB family carbohydrate kinase	3	5	0.6
PF00462	Glutaredoxin	3	5	0.6
PF00653	Inhibitor of Apoptosis domain	3	5	0.6
PF02198	Sterile alpha motif (SAM)/Pointed domain	3	5	0.6
PF02259	FAT domain	3	5	0.6
PF03151	Triose-phosphate Transporter family	3	5	0.6
PF05826	Phospholipase A2	3	5	0.6
PF12352	Snare region anchored in the vesicle membrane C-terminus	3	5	0.6
PF12698	ABC-2 family transporter protein	3	5	0.6
PF13432	Tetratricopeptide repeat	3	5	0.6
PF13716	Divergent CRAL/TRIO domain	3	5	0.6
PF00989	PAS fold	5	8	0.625
PF05225	helix-turn-helix, Psq domain	5	8	0.625
PF01607	Chitin binding Peritrophin-A domain	29	44	0.659091
PF00173	Cytochrome b5-like Heme/Steroid binding domain	8	12	0.666667
PF07841	DM4/DM12 family	8	12	0.666667
PF00178	Ets-domain	6	9	0.666667
PF00292	'Paired box' domain	6	9	0.666667
PF13895	Immunoglobulin domain	6	9	0.666667
PF00175	Oxidoreductase NAD-binding domain	4	6	0.666667
PF00876	Innexin	4	6	0.666667
PF01392	Fz domain	4	6	0.666667
PF01421	Reprolysin (M12B) family zinc metalloprotease	4	6	0.666667
PF01757	Acyltransferase family	4	6	0.666667
PF02136	Nuclear transport factor 2 (NTF2) domain	4	6	0.666667
PF03392	Insect pheromone-binding family, A10/OS-D	4	6	0.666667
PF05739	SNARE domain	4	6	0.666667
PF16077	Spaetzle	4	6	0.666667
PF00092	von Willebrand factor type A domain	2	3	0.666667
PF00111	2Fe-2S iron-sulfur cluster binding domain	2	3	0.666667
PF00291	Pyridoxal-phosphate dependent enzyme	2	3	0.666667
PF00338	Ribosomal protein S10p/S20e	2	3	0.666667
PF00351	Biopterin-dependent aromatic amino acid hydroxylase	2	3	0.666667
PF00352	Transcription factor TFIID (or TATA-binding protein, TBP)	2	3	0.666667
PF00354	Pentaxin family	2	3	0.666667
PF00380	Ribosomal protein S9/S16	2	3	0.666667
PF00432	Prenyltransferase and squalene oxidase repeat	2	3	0.666667
PF00467	KOW motif	2	3	0.666667
PF00472	RF-1 domain	2	3	0.666667
PF00646	F-box domain	2	3	0.666667
PF00667	FAD binding domain	2	3	0.666667
PF00757	Furin-like cysteine rich region	2	3	0.666667
PF00849	RNA pseudouridylate synthase	2	3	0.666667
PF00892	EamA-like transporter family	2	3	0.666667
PF00970	Oxidoreductase FAD-binding domain	2	3	0.666667
PF01040	UbiA prenyltransferase family	2	3	0.666667
PF01074	Glycosyl hydrolases family 38 N-terminal domain	2	3	0.666667
PF01119	DNA mismatch repair protein, C-terminal domain	2	3	0.666667
PF01239	Protein prenyltransferase alpha subunit repeat	2	3	0.666667
PF01299	Lysosome-associated membrane glycoprotein (Lamp)	2	3	0.666667
PF01428	AN1-like Zinc finger	2	3	0.666667
PF01483	Proprotein convertase P-domain	2	3	0.666667
PF01571	Aminomethyltransferase folate-binding domain	2	3	0.666667
PF01835	MG2 domain	2	3	0.666667
PF02036	SCP-2 sterol transfer family	2	3	0.666667
PF02196	Raf-like Ras-binding domain	2	3	0.666667
PF03109	ABC1 family	2	3	0.666667
PF03399	SAC3/GANP family	2	3	0.666667
PF03619	Organic solute transporter Ostalpha	2	3	0.666667
PF03725	3' exoribonuclease family, domain 2	2	3	0.666667
PF03943	TAP C-terminal domain	2	3	0.666667
PF04051	Transport protein particle (TRAPP) component	2	3	0.666667
PF04083	Partial alpha/beta-hydrolase lipase region	2	3	0.666667
PF04104	Eukaryotic and archaeal DNA primase, large subunit	2	3	0.666667
PF04145	Ctr copper transporter family	2	3	0.666667
PF04433	SWIRM domain	2	3	0.666667
PF04561	RNA polymerase Rpb2, domain 2	2	3	0.666667
PF04563	RNA polymerase beta subunit	2	3	0.666667
PF04565	RNA polymerase Rpb2, domain 3	2	3	0.666667
PF04675	DNA ligase N terminus	2	3	0.666667
PF05188	MutS domain II	2	3	0.666667
PF05190	MutS family domain IV	2	3	0.666667
PF05577	Serine carboxypeptidase S28	2	3	0.666667
PF05978	Ion channel regulatory protein UNC-93	2	3	0.666667
PF06371	Diaphanous GTPase-binding Domain	2	3	0.666667
PF06747	CHCH domain	2	3	0.666667
PF08399	VWA N-terminal	2	3	0.666667
PF08449	UAA transporter family	2	3	0.666667
PF08544	GHMP kinases C terminal	2	3	0.666667
PF08725	Integrin beta cytoplasmic domain	2	3	0.666667
PF08953	Domain of unknown function (DUF1899)	2	3	0.666667
PF09068	EF hand	2	3	0.666667
PF09069	EF-hand	2	3	0.666667
PF09261	Alpha mannosidase middle domain	2	3	0.666667
PF10197	N-terminal domain of CBF1 interacting co-repressor CIR	2	3	0.666667
PF10283	Zinc-finger (CX5CX6HX5H) motif	2	3	0.666667
PF10602	26S proteasome subunit RPN7	2	3	0.666667
PF11799	impB/mucB/samB family C-terminal domain	2	3	0.666667
PF13229	Right handed beta helix region	2	3	0.666667
PF13347	MFS/sugar transport protein	2	3	0.666667
PF13405	EF-hand domain	2	3	0.666667
PF13901	Putative zinc-RING and/or ribbon	2	3	0.666667
PF14523	Syntaxin-like protein	2	3	0.666667
PF14844	PH domain associated with Beige/BEACH	2	3	0.666667
PF15860	Domain of unknown function (DUF4728)	2	3	0.666667
PF17039	Fucosyltransferase, N-terminal	2	3	0.666667
PF00782	Dual specificity phosphatase, catalytic domain	11	16	0.6875
PF08205	CD80-like C2-set immunoglobulin domain	9	13	0.692308
PF00293	NUDIX domain	7	10	0.7
PF00531	Death domain	7	10	0.7
PF00754	F5/8 type C domain	7	10	0.7
PF11838	ERAP1-like C-terminal domain	7	10	0.7
PF01926	50S ribosome-binding GTPase	10	14	0.714286
PF10545	Alcohol dehydrogenase transcription factor Myb/SANT-like	10	14	0.714286
PF00808	Histone-like transcription factor (CBF/NF-Y) and archaeal histone	5	7	0.714286
PF00929	Exonuclease	5	7	0.714286
PF02460	Patched family	5	7	0.714286
PF13903	PMP-22/EMP/MP20/Claudin tight junction	5	7	0.714286
PF00328	Histidine phosphatase superfamily (branch 2)	11	15	0.733333
PF03022	Major royal jelly protein	15	20	0.75
PF01363	FYVE zinc finger	12	16	0.75
PF10613	Ligated ion channel L-glutamate- and glycine-binding site	12	16	0.75
PF00201	UDP-glucoronosyl and UDP-glucosyl transferase	9	12	0.75
PF07647	SAM domain (Sterile alpha motif)	9	12	0.75
PF07992	Pyridine nucleotide-disulphide oxidoreductase	9	12	0.75
PF00339	Arrestin (or S-antigen), N-terminal domain	6	8	0.75
PF00858	Amiloride-sensitive sodium channel	6	8	0.75
PF01145	SPFH domain / Band 7 family	6	8	0.75
PF02148	Zn-finger in ubiquitin-hydrolases and other protein	6	8	0.75
PF02463	RecF/RecN/SMC N terminal domain	6	8	0.75
PF05193	Peptidase M16 inactive domain	6	8	0.75
PF10584	Proteasome subunit A N-terminal signature	6	8	0.75
PF12799	Leucine Rich repeats (2 copies)	6	8	0.75
PF00097	Zinc finger, C3HC4 type (RING finger)	3	4	0.75
PF00145	C-5 cytosine-specific DNA methylase	3	4	0.75
PF00188	Cysteine-rich secretory protein family	3	4	0.75
PF00341	PDGF/VEGF domain	3	4	0.75
PF00458	WHEP-TRS domain	3	4	0.75
PF00554	Rel homology DNA-binding domain	3	4	0.75
PF00631	GGL domain	3	4	0.75
PF00753	Metallo-beta-lactamase superfamily	3	4	0.75
PF00852	Glycosyltransferase family 10 (fucosyltransferase) C-term	3	4	0.75
PF00853	Runt domain	3	4	0.75
PF01064	Activin types I and II receptor domain	3	4	0.75
PF01189	16S rRNA methyltransferase RsmB/F	3	4	0.75
PF01429	Methyl-CpG binding domain	3	4	0.75
PF01467	Cytidylyltransferase-like	3	4	0.75
PF01501	Glycosyl transferase family 8	3	4	0.75
PF01510	N-acetylmuramoyl-L-alanine amidase	3	4	0.75
PF01697	Glycosyltransferase family 92	3	4	0.75
PF01734	Patatin-like phospholipase	3	4	0.75
PF01833	IPT/TIG domain	3	4	0.75
PF01839	FG-GAP repeat	3	4	0.75
PF01979	Amidohydrolase family	3	4	0.75
PF02020	eIF4-gamma/eIF5/eIF2-epsilon	3	4	0.75
PF02171	Piwi domain	3	4	0.75
PF02494	HYR domain	3	4	0.75
PF02828	L27 domain	3	4	0.75
PF02996	Prefoldin subunit	3	4	0.75
PF03104	DNA polymerase family B, exonuclease domain	3	4	0.75
PF03765	CRAL/TRIO, N-terminal domain	3	4	0.75
PF03828	Cid1 family poly A polymerase	3	4	0.75
PF04438	HIT zinc finger	3	4	0.75
PF05033	Pre-SET motif	3	4	0.75
PF05154	TM2 domain	3	4	0.75
PF05253	U11-48K-like CHHC zinc finger	3	4	0.75
PF07562	Nine Cysteines Domain of family 3 GPCR	3	4	0.75
PF07700	Haem-NO-binding	3	4	0.75
PF08423	Rad51	3	4	0.75
PF08441	Integrin alpha	3	4	0.75
PF08542	Replication factor C C-terminal domain	3	4	0.75
PF09412	Endoribonuclease XendoU	3	4	0.75
PF10277	Frag1/DRAM/Sfk1 family	3	4	0.75
PF13415	Galactose oxidase, central domain	3	4	0.75
PF13418	Galactose oxidase, central domain	3	4	0.75
PF13426	PAS domain	3	4	0.75
PF13640	2OG-Fe(II) oxygenase superfamily	3	4	0.75
PF13771	PHD-like zinc-binding domain	3	4	0.75
PF13854	Kelch motif	3	4	0.75
PF14912	Testicular haploid expressed repeat	3	4	0.75
PF15410	Pleckstrin homology domain	3	4	0.75
PF16179	Rel homology dimerisation domain	3	4	0.75
PF16363	GDP-mannose 4,6 dehydratase	3	4	0.75
PF16661	Metallo-beta-lactamase superfamily domain	3	4	0.75
PF16908	Vacuolar sorting-associated protein 13, N-terminal	3	4	0.75
PF00412	LIM domain	22	29	0.758621
PF00856	SET domain	19	25	0.76
PF13637	Ankyrin repeats (many copies)	14	18	0.777778
PF00379	Insect cuticle protein	29	37	0.783784
PF00002	7 transmembrane receptor (Secretin family)	11	14	0.785714
PF00664	ABC transporter transmembrane region	11	14	0.785714
PF12775	P-loop containing dynein motor region D3	11	14	0.785714
PF12780	P-loop containing dynein motor region D4	11	14	0.785714
PF13923	Zinc finger, C3HC4 type (RING finger)	11	14	0.785714
PF13927	Immunoglobulin domain	59	74	0.797297
PF12937	F-box-like	20	25	0.8
PF00060	Ligand-gated ion channel	16	20	0.8
PF00090	Thrombospondin type 1 domain	16	20	0.8
PF00194	Eukaryotic-type carbonic anhydrase	8	10	0.8
PF00348	Polyprenyl synthetase	8	10	0.8
PF01347	Lipoprotein amino terminal region	8	10	0.8
PF01562	Reprolysin family propeptide	8	10	0.8
PF00630	Filamin/ABP280 repeat	4	5	0.8
PF01437	Plexin repeat	4	5	0.8
PF01448	ELM2 domain	4	5	0.8
PF01545	Cation efflux family	4	5	0.8
PF01728	FtsJ-like methyltransferase	4	5	0.8
PF01740	STAS domain	4	5	0.8
PF01805	Surp module	4	5	0.8
PF02174	PTB domain (IRS-1 type)	4	5	0.8
PF02826	D-isomer specific 2-hydroxyacid dehydrogenase, NAD binding domain	4	5	0.8
PF02953	Tim10/DDP family zinc finger	4	5	0.8
PF02984	Cyclin, C-terminal domain	4	5	0.8
PF03722	Hemocyanin, all-alpha domain	4	5	0.8
PF04055	Radical SAM superfamily	4	5	0.8
PF05383	La domain	4	5	0.8
PF05920	Homeobox KN domain	4	5	0.8
PF06470	SMC proteins Flexible Hinge Domain	4	5	0.8
PF07534	TLD	4	5	0.8
PF07731	Multicopper oxidase	4	5	0.8
PF07732	Multicopper oxidase	4	5	0.8
PF08736	FERM adjacent (FA)	4	5	0.8
PF13848	Thioredoxin-like domain	4	5	0.8
PF14559	Tetratricopeptide repeat	4	5	0.8
PF16207	RAWUL domain RING finger- and WD40-associated ubiquitin-like	4	5	0.8
PF00046	Homeobox domain	69	86	0.802326
PF02931	Neurotransmitter-gated ion-channel ligand binding domain	17	21	0.809524
PF00003	7 transmembrane sweet-taste receptor of 3 GCPR	9	11	0.818182
PF01431	Peptidase family M13	9	11	0.818182
PF09379	FERM N-terminal domain	9	11	0.818182
PF13499	EF-hand domain pair	33	40	0.825
PF13639	Ring finger domain	19	23	0.826087
PF00083	Sugar (and other) transporter	40	48	0.833333
PF07776	Zinc-finger associated domain (zf-AD)	25	30	0.833333
PF00620	RhoGAP domain	20	24	0.833333
PF00515	Tetratricopeptide repeat	10	12	0.833333
PF00640	Phosphotyrosine interaction domain (PTB/PID)	10	12	0.833333
PF01529	DHHC palmitoyltransferase	10	12	0.833333
PF00200	Disintegrin	5	6	0.833333
PF00656	Caspase domain	5	6	0.833333
PF00657	GDSL-like Lipase/Acylhydrolase	5	6	0.833333
PF00675	Insulinase (Peptidase family M16)	5	6	0.833333
PF01284	Membrane-associating domain	5	6	0.833333
PF01762	Galactosyltransferase	5	6	0.833333
PF02145	Rap/ran-GAP	5	6	0.833333
PF02181	Formin Homology 2 Domain	5	6	0.833333
PF02338	OTU-like cysteine protease	5	6	0.833333
PF02793	Hormone receptor domain	5	6	0.833333
PF03137	Organic Anion Transporter Polypeptide (OATP) family	5	6	0.833333
PF04117	Mpv17 / PMP22 family	5	6	0.833333
PF08264	Anticodon-binding domain of tRNA	5	6	0.833333
PF13086	AAA domain	5	6	0.833333
PF13087	AAA domain	5	6	0.833333
PF16211	C-terminus of histone H2A	5	6	0.833333
PF01344	Kelch motif	11	13	0.846154
PF07885	Ion channel	11	13	0.846154
PF00505	HMG (high mobility group) box	23	27	0.851852
PF00335	Tetraspanin family	18	21	0.857143
PF00122	E1-E2 ATPase	12	14	0.857143
PF01753	MYND finger	12	14	0.857143
PF00056	lactate/malate dehydrogenase, NAD binding domain	6	7	0.857143
PF00079	Serpin (serine protease inhibitor)	6	7	0.857143
PF00110	wnt family	6	7	0.857143
PF00233	3'5'-cyclic nucleotide phosphodiesterase	6	7	0.857143
PF00254	FKBP-type peptidyl-prolyl cis-trans isomerase	6	7	0.857143
PF00441	Acyl-CoA dehydrogenase, C-terminal domain	6	7	0.857143
PF00459	Inositol monophosphatase family	6	7	0.857143
PF00575	S1 RNA binding domain	6	7	0.857143
PF00789	UBX domain	6	7	0.857143
PF01388	ARID/BRIGHT DNA binding domain	6	7	0.857143
PF01485	IBR domain, a half RING-finger domain	6	7	0.857143
PF02771	Acyl-CoA dehydrogenase, N-terminal domain	6	7	0.857143
PF06602	Myotubularin-like phosphatase domain	6	7	0.857143
PF06757	Insect allergen related repeat, nitrile-specifier detoxification	6	7	0.857143
PF12171	Zinc-finger double-stranded RNA-binding	6	7	0.857143
PF12906	RING-variant domain	6	7	0.857143
PF00010	Helix-loop-helix DNA-binding domain	39	45	0.866667
PF00134	Cyclin, N-terminal domain	13	15	0.866667
PF01151	GNS1/SUR4 family	13	15	0.866667
PF00651	BTB/POZ domain	55	63	0.873016
PF00025	ADP-ribosylation factor family	14	16	0.875
PF01399	PCI domain	14	16	0.875
PF12781	ATP-binding dynein motor region D5	14	16	0.875
PF00385	Chromo (CHRromatin Organisation MOdifier) domain	7	8	0.875
PF00406	Adenylate kinase	7	8	0.875
PF00627	UBA/TS-N domain	7	8	0.875
PF00957	Synaptobrevin	7	8	0.875
PF01217	Clathrin adaptor complex small chain	7	8	0.875
PF02535	ZIP Zinc transporter	7	8	0.875
PF03567	Sulfotransferase family	7	8	0.875
PF00096	Zinc finger, C2H2 type	29	33	0.878788
PF00001	7 transmembrane receptor (rhodopsin family)	55	62	0.887097
PF00400	WD domain, G-beta repeat	48	54	0.888889
PF00621	RhoGEF domain	24	27	0.888889
PF00536	SAM domain (Sterile alpha motif)	16	18	0.888889
PF00100	Zona pellucida-like domain	8	9	0.888889
PF00567	Tudor domain	8	9	0.888889
PF00884	Sulfatase	8	9	0.888889
PF00916	Sulfate permease family	8	9	0.888889
PF02770	Acyl-CoA dehydrogenase, middle domain	8	9	0.888889
PF02866	lactate/malate dehydrogenase, alpha/beta C-terminal domain	8	9	0.888889
PF07716	Basic region leucine zipper	8	9	0.888889
PF08385	Dynein heavy chain, N-terminal region 1	8	9	0.888889
PF13193	AMP-binding enzyme C-terminal domain	8	9	0.888889
PF13424	Tetratricopeptide repeat	8	9	0.888889
PF00089	Trypsin	51	57	0.894737
PF05199	GMC oxidoreductase	17	19	0.894737
PF13855	Leucine rich repeat	69	77	0.896104
PF00373	FERM central domain	18	20	0.9
PF00246	Zinc carboxypeptidase	9	10	0.9
PF00481	Protein phosphatase 2C	9	10	0.9
PF05649	Peptidase family M13	9	10	0.9
PF07648	Kazal-type serine protease inhibitor domain	9	10	0.9
PF07728	AAA domain (dynein-related subfamily)	9	10	0.9
PF13414	TPR repeat	9	10	0.9
PF00130	Phorbol esters/diacylglycerol binding domain (C1 domain)	19	21	0.904762
PF00397	WW domain	19	21	0.904762
PF00071	Ras family	58	64	0.90625
PF07679	Immunoglobulin I-set domain	60	66	0.909091
PF00105	Zinc finger, C4 type (two domains)	20	22	0.909091
PF00474	Sodium:solute symporter family	10	11	0.909091
PF00855	PWWP domain	10	11	0.909091
PF03133	Tubulin-tyrosine ligase family	10	11	0.909091
PF09380	FERM C-terminal PH-like domain	10	11	0.909091
PF00454	Phosphatidylinositol 3- and 4-kinase	11	12	0.916667
PF00561	alpha/beta hydrolase fold	11	12	0.916667
PF02958	Ecdysteroid kinase	11	12	0.916667
PF00307	Calponin homology (CH) domain	23	25	0.92
PF01553	Acyltransferase	12	13	0.923077
PF07690	Major Facilitator Superfamily	49	53	0.924528
PF00168	C2 domain	39	42	0.928571
PF00102	Protein-tyrosine phosphatase	13	14	0.928571
PF00431	CUB domain	13	14	0.928571
PF00583	Acetyltransferase (GNAT) family	13	14	0.928571
PF01490	Transmembrane amino acid transporter protein	13	14	0.928571
PF03953	Tubulin C-terminal domain	13	14	0.928571
PF06585	Haemolymph juvenile hormone binding protein (JHBP)	13	14	0.928571
PF00226	DnaJ domain	28	30	0.933333
PF00091	Tubulin/FtsZ family, GTPase domain	14	15	0.933333
PF00227	Proteasome subunit	14	15	0.933333
PF12796	Ankyrin repeats (3 copies)	72	77	0.935065
PF00027	Cyclic nucleotide-binding domain	15	16	0.9375
PF00151	Lipase	15	16	0.9375
PF00153	Mitochondrial carrier protein	31	33	0.939394
PF00176	SNF2 family N-terminal domain	16	17	0.941176
PF01423	LSM domain	16	17	0.941176
PF00149	Calcineurin-like phosphoesterase	18	19	0.947368
PF02932	Neurotransmitter-gated ion-channel transmembrane region	18	19	0.947368
PF00271	Helicase conserved C-terminal domain	73	77	0.948052
PF00076	RNA recognition motif. (a.k.a. RRM, RBD, or RNP domain)	94	99	0.949495
PF00439	Bromodomain	19	20	0.95
PF00732	GMC oxidoreductase	20	21	0.952381
PF00787	PX domain	20	21	0.952381
PF00169	PH domain	42	44	0.954545
PF00085	Thioredoxin	21	22	0.954545
PF00067	Cytochrome P450	45	47	0.957447
PF00443	Ubiquitin carboxyl-terminal hydrolase	23	24	0.958333
PF00017	SH2 domain	26	27	0.962963
PF14604	Variant SH3 domain	28	29	0.965517
PF00018	SH3 domain	31	32	0.96875
PF00520	Ion transport protein	33	34	0.970588
PF00041	Fibronectin type III domain	34	35	0.971429
PF00106	short chain dehydrogenase	34	35	0.971429
PF00004	ATPase family associated with various cellular activities (AAA)	37	38	0.973684
PF07714	Protein tyrosine kinase	50	51	0.980392
PF00069	Protein kinase domain	152	155	0.980645
PF00270	DEAD/DEAH box helicase	56	56	1
PF00595	PDZ domain (Also known as DHR or GLGF)	56	56	1
PF00005	ABC transporter	39	39	1
PF00179	Ubiquitin-conjugating enzyme	26	26	1
PF00225	Kinesin motor domain	25	25	1
PF00240	Ubiquitin family	22	22	1
PF07898	Protein of unknown function (DUF1676)	22	22	1
PF00566	Rab-GTPase-TBC domain	21	21	1
PF13920	Zinc finger, C3HC4 type (RING finger)	21	21	1
PF07645	Calcium-binding EGF domain	20	20	1
PF00104	Ligand-binding domain of nuclear hormone receptor	19	19	1
PF00160	Cyclophilin type peptidyl-prolyl cis-trans isomerase/CLD	17	17	1
PF00211	Adenylate and Guanylate cyclase catalytic domain	17	17	1
PF00009	Elongation factor Tu GTP binding domain	16	16	1
PF00250	Forkhead domain	16	16	1
PF00501	AMP-binding enzyme	16	16	1
PF07707	BTB And C-terminal Kelch	16	16	1
PF00650	CRAL/TRIO domain	15	15	1
PF08393	Dynein heavy chain, N-terminal region 2	15	15	1
PF12777	Microtubule-binding stalk of dynein motor	15	15	1
PF00632	HECT-domain (ubiquitin-transferase)	14	14	1
PF01585	G-patch domain	14	14	1
PF04408	Helicase associated domain (HA2)	14	14	1
PF12774	Hydrolytic ATP binding site of dynein motor region D1	14	14	1
PF00415	Regulator of chromosome condensation (RCC1) repeat	13	13	1
PF00498	FHA domain	13	13	1
PF00155	Aminotransferase class I and II	12	12	1
PF00702	haloacid dehalogenase-like hydrolase	12	12	1
PF00788	Ras association (RalGDS/AF-6) domain	12	12	1
PF07717	Oligonucleotide/oligosaccharide-binding (OB)-fold	12	12	1
PF00249	Myb-like DNA-binding domain	11	11	1
PF00282	Pyridoxal-dependent decarboxylase conserved domain	11	11	1
PF00615	Regulator of G protein signaling domain	11	11	1
PF02214	BTB/POZ domain	11	11	1
PF14580	Leucine-rich repeat	11	11	1
PF00118	TCP-1/cpn60 chaperonin family	10	10	1
PF00433	Protein kinase C terminal domain	10	10	1
PF00569	Zinc finger, ZZ type	10	10	1
PF01398	JAB1/Mov34/MPN/PAD-1 ubiquitin protease	10	10	1
PF03015	Male sterility protein	10	10	1
PF03144	Elongation factor Tu domain 2	10	10	1
PF07993	Male sterility protein	10	10	1
PF00047	Immunoglobulin domain	9	9	1
PF00053	Laminin EGF domain	9	9	1
PF00054	Laminin G domain	9	9	1
PF00059	Lectin C-type domain	9	9	1
PF00170	bZIP transcription factor	9	9	1
PF00171	Aldehyde dehydrogenase family	9	9	1
PF00378	Enoyl-CoA hydratase/isomerase	9	9	1
PF00535	Glycosyl transferase family 2	9	9	1
PF00557	Metallopeptidase family M24	9	9	1
PF00625	Guanylate kinase	9	9	1
PF01412	Putative GTPase activating protein for Arf	9	9	1
PF02759	RUN domain	9	9	1
PF03098	Animal haem peroxidase	9	9	1
PF13520	Amino acid permease	9	9	1
PF14670	Coagulation Factor Xa inhibitory site	9	9	1
PF00019	Transforming growth factor beta like domain	8	8	1
PF00128	Alpha amylase, catalytic domain	8	8	1
PF00248	Aldo/keto reductase family	8	8	1
PF00364	Biotin-requiring enzyme	8	8	1
PF00493	MCM2/3/5 family	8	8	1
PF00642	Zinc finger C-x8-C-x5-C-x3-H type (and similar)	8	8	1
PF00781	Diacylglycerol kinase catalytic domain	8	8	1
PF00899	ThiF family	8	8	1
PF03351	DOMON domain	8	8	1
PF14598	PAS domain	8	8	1
PF17207	MCM OB domain	8	8	1
PF00084	Sushi repeat (SCR repeat)	7	7	1
PF00326	Prolyl oligopeptidase family	7	7	1
PF00514	Armadillo/beta-catenin-like repeat	7	7	1
PF00643	B-box zinc finger	7	7	1
PF00652	Ricin-type beta-trefoil lectin domain	7	7	1
PF00688	TGF-beta propeptide	7	7	1
PF00690	Cation transporter/ATPase, N-terminus	7	7	1
PF01138	3' exoribonuclease family, domain 1	7	7	1
PF01602	Adaptin N terminal region	7	7	1
PF02373	JmjC domain, hydroxylase	7	7	1
PF02779	Transketolase, pyrimidine binding domain	7	7	1
PF03357	Snf7	7	7	1
PF07527	Hairy Orange	7	7	1
PF08240	Alcohol dehydrogenase GroES-like domain	7	7	1
PF14497	Glutathione S-transferase, C-terminal domain	7	7	1
PF14555	UBA-like domain	7	7	1
PF00012	Hsp70 protein	6	6	1
PF00058	Low-density lipoprotein receptor repeat class B	6	6	1
PF00094	von Willebrand factor type D domain	6	6	1
PF00107	Zinc-binding dehydrogenase	6	6	1
PF00133	tRNA synthetases class I (I, L, M and V)	6	6	1
PF00300	Histidine phosphatase superfamily (branch 1)	6	6	1
PF00320	GATA zinc finger	6	6	1
PF00370	FGGY family of carbohydrate kinases, N-terminal domain	6	6	1
PF00611	Fes/CIP4, and EFC/F-BAR homology domain	6	6	1
PF00616	GTPase-activator protein for Ras-like GTPase	6	6	1
PF00618	RasGEF N-terminal motif	6	6	1
PF00626	Gelsolin repeat	6	6	1
PF00641	Zn-finger in Ran binding protein and others	6	6	1
PF00676	Dehydrogenase E1 component	6	6	1
PF00679	Elongation factor G C-terminus	6	6	1
PF00780	CNH domain	6	6	1
PF00888	Cullin family	6	6	1
PF00995	Sec1 family	6	6	1
PF01248	Ribosomal protein L7Ae/L30e/S12e/Gadd45 family	6	6	1
PF01569	PAP2 superfamily	6	6	1
PF02146	Sir2 family	6	6	1
PF02782	FGGY family of carbohydrate kinases, C-terminal domain	6	6	1
PF02798	Glutathione S-transferase, N-terminal domain	6	6	1
PF02854	MIF4G domain	6	6	1
PF02893	GRAM domain	6	6	1
PF03031	NLI interacting factor-like phosphatase	6	6	1
PF03114	BAR domain	6	6	1
PF07701	Heme NO binding associated	6	6	1
PF08241	Methyltransferase domain	6	6	1
PF12624	N-terminal region of Chorein or VPS13	6	6	1
PF13832	PHD-zinc-finger like domain	6	6	1
PF14551	MCM N-terminal domain	6	6	1
PF00095	WAP-type (Whey Acidic Protein) 'four-disulfide core'	5	5	1
PF00108	Thiolase, N-terminal domain	5	5	1
PF00152	tRNA synthetases class II (D, K and N)	5	5	1
PF00266	Aminotransferase class-V	5	5	1
PF00324	Amino acid permease	5	5	1
PF00372	Hemocyanin, copper containing domain	5	5	1
PF00375	Sodium:dicarboxylate symporter family	5	5	1
PF00388	Phosphatidylinositol-specific phospholipase C, X domain	5	5	1
PF00581	Rhodanese-like domain	5	5	1
PF00609	Diacylglycerol kinase accessory domain	5	5	1
PF00610	Domain found in Dishevelled, Egl-10, and Pleckstrin (DEP)	5	5	1
PF00728	Glycosyl hydrolase family 20, catalytic domain	5	5	1
PF00928	Adaptor complexes medium subunit family	5	5	1
PF00930	Dipeptidyl peptidase IV (DPP IV) N-terminal region	5	5	1
PF01105	emp24/gp25L/p24 family/GOLD	5	5	1
PF01244	Membrane dipeptidase (Peptidase family M19)	5	5	1
PF01266	FAD dependent oxidoreductase	5	5	1
PF01369	Sec7 domain	5	5	1
PF01370	NAD dependent epimerase/dehydratase family	5	5	1
PF01556	DnaJ C terminal domain	5	5	1
PF01576	Myosin tail	5	5	1
PF01582	TIR domain	5	5	1
PF01612	3'-5' exonuclease	5	5	1
PF01852	START domain	5	5	1
PF02037	SAP domain	5	5	1
PF02138	Beige/BEACH domain	5	5	1
PF02141	DENN (AEX-3) domain	5	5	1
PF02170	PAZ domain	5	5	1
PF02207	Putative zinc finger in N-recognin (UBR box)	5	5	1
PF02260	FATC domain	5	5	1
PF02466	Tim17/Tim22/Tim23/Pmp24 family	5	5	1
PF02518	Histidine kinase-, DNA gyrase B-, and HSP90-like ATPase	5	5	1
PF02803	Thiolase, C-terminal domain	5	5	1
PF03129	Anticodon binding domain	5	5	1
PF03143	Elongation factor Tu C-terminal domain	5	5	1
PF03148	Tektin family	5	5	1
PF03165	MH1 domain	5	5	1
PF03166	MH2 domain	5	5	1
PF03723	Hemocyanin, ig-like domain	5	5	1
PF04130	Spc97 / Spc98 family	5	5	1
PF04389	Peptidase family M28	5	5	1
PF04427	Brix domain	5	5	1
PF04564	U-box domain	5	5	1
PF10557	Cullin protein neddylation domain	5	5	1
PF12349	Sterol-sensing domain of SREBP cleavage-activation	5	5	1
PF12662	Complement Clr-like EGF-like	5	5	1
PF12832	MFS_1 like family	5	5	1
PF13589	Histidine kinase-, DNA gyrase B-, and HSP90-like ATPase	5	5	1
PF14492	Elongation Factor G, domain II	5	5	1
PF16209	Phospholipid-translocating ATPase N-terminal	5	5	1
PF16212	Phospholipid-translocating P-type ATPase C-terminal	5	5	1
PF00006	ATP synthase alpha/beta family, nucleotide-binding domain	4	4	1
PF00014	Kunitz/Bovine pancreatic trypsin inhibitor domain	4	4	1
PF00043	Glutathione S-transferase, C-terminal domain	4	4	1
PF00051	Kringle domain	4	4	1
PF00052	Laminin B (Domain IV)	4	4	1
PF00080	Copper/zinc superoxide dismutase (SODC)	4	4	1
PF00093	von Willebrand factor type C domain	4	4	1
PF00136	DNA polymerase family B	4	4	1
PF00157	Pou domain - N-terminal to homeobox domain	4	4	1
PF00180	Isocitrate/isopropylmalate dehydrogenase	4	4	1
PF00183	Hsp90 protein	4	4	1
PF00198	2-oxoacid dehydrogenases acyltransferase (catalytic domain)	4	4	1
PF00261	Tropomyosin	4	4	1
PF00334	Nucleoside diphosphate kinase	4	4	1
PF00389	D-isomer specific 2-hydroxyacid dehydrogenase, catalytic domain	4	4	1
PF00402	Calponin family repeat	4	4	1
PF00530	Scavenger receptor cysteine-rich domain	4	4	1
PF00534	Glycosyl transferases group 1	4	4	1
PF00549	CoA-ligase	4	4	1
PF00568	WH1 domain	4	4	1
PF00571	CBS domain	4	4	1
PF00579	tRNA synthetases class I (W and Y)	4	4	1
PF00613	Phosphoinositide 3-kinase family, accessory domain (PIK domain)	4	4	1
PF00637	Region in Clathrin and VPS	4	4	1
PF00638	RanBP1 domain	4	4	1
PF00735	Septin	4	4	1
PF00752	XPG N-terminal domain	4	4	1
PF00786	P21-Rho-binding domain	4	4	1
PF00790	VHS domain	4	4	1
PF00791	ZU5 domain	4	4	1
PF00850	Histone deacetylase domain	4	4	1
PF00867	XPG I-region	4	4	1
PF00887	Acyl CoA binding protein	4	4	1
PF01008	Initiation factor 2 subunit family	4	4	1
PF01027	Inhibitor of apoptosis-promoting Bax1	4	4	1
PF01048	Phosphorylase superfamily	4	4	1
PF01066	CDP-alcohol phosphatidyltransferase	4	4	1
PF01082	Copper type II ascorbate-dependent monooxygenase, N-terminal domain	4	4	1
PF01096	Transcription factor S-II (TFIIS)	4	4	1
PF01112	Asparaginase	4	4	1
PF01207	Dihydrouridine synthase (Dus)	4	4	1
PF01237	Oxysterol-binding protein	4	4	1
PF01263	Aldose 1-epimerase	4	4	1
PF01401	Angiotensin-converting enzyme	4	4	1
PF01425	Amidase	4	4	1
PF01436	NHL repeat	4	4	1
PF01465	GRIP domain	4	4	1
PF01853	MOZ/SAS family	4	4	1
PF01920	Prefoldin subunit	4	4	1
PF02014	Reeler domain	4	4	1
PF02194	PXA domain	4	4	1
PF02204	Vacuolar sorting protein 9 (VPS9) domain	4	4	1
PF02221	ML domain	4	4	1
PF02244	Carboxypeptidase activation peptide	4	4	1
PF02383	SacI homology domain	4	4	1
PF02780	Transketolase, C-terminal domain	4	4	1
PF02786	Carbamoyl-phosphate synthase L chain, ATP binding domain	4	4	1
PF02820	mbt repeat	4	4	1
PF02825	WWE domain	4	4	1
PF02847	MA3 domain	4	4	1
PF02874	ATP synthase alpha/beta family, beta-barrel domain	4	4	1
PF02883	Adaptin C-terminal domain	4	4	1
PF03006	Haemolysin-III related	4	4	1
PF03067	Lytic polysaccharide mono-oxygenase, cellulose-degrading	4	4	1
PF03281	Mab-21 protein	4	4	1
PF03522	Solute carrier family 12	4	4	1
PF03637	Mob1/phocein family	4	4	1
PF03645	Tctex-1 family	4	4	1
PF03712	Copper type II ascorbate-dependent monooxygenase, C-terminal domain	4	4	1
PF03764	Elongation factor G, domain IV	4	4	1
PF03770	Inositol polyphosphate kinase	4	4	1
PF04042	DNA polymerase alpha/epsilon subunit B	4	4	1
PF04193	PQ loop repeat	4	4	1
PF04818	RNA polymerase II-binding domain.	4	4	1
PF05186	Dpy-30 motif	4	4	1
PF05347	Complex 1 protein (LYR family)	4	4	1
PF06367	Diaphanous FH3 Domain	4	4	1
PF06701	Mib_herc2	4	4	1
PF06733	DEAD_2	4	4	1
PF06920	Dock homology region 2	4	4	1
PF07738	Sad1 / UNC-like C-terminal	4	4	1
PF08389	Exportin 1-like protein	4	4	1
PF08711	TFIIS helical bundle-like domain	4	4	1
PF09011	HMG-box domain	4	4	1
PF09279	Phosphoinositide-specific phospholipase C, efhand-like	4	4	1
PF09815	XK-related protein	4	4	1
PF10294	Lysine methyltransferase	4	4	1
PF10417	C-terminal domain of 1-Cys peroxiredoxin	4	4	1
PF10601	LITAF-like zinc ribbon domain	4	4	1
PF10607	CTLH/CRA C-terminal to LisH motif domain	4	4	1
PF10996	Beta-Casp domain	4	4	1
PF11717	RNA binding activity-knot of a chromodomain	4	4	1
PF12763	Cytoskeletal-regulatory complex EF hand	4	4	1
PF12874	Zinc-finger of C2H2 type	4	4	1
PF13012	Maintenance of mitochondrial structure and function	4	4	1
PF13307	Helicase C-terminal domain	4	4	1
PF13344	Haloacid dehalogenase-like hydrolase	4	4	1
PF13445	RING-type zinc-finger	4	4	1
PF13532	2OG-Fe(II) oxygenase superfamily	4	4	1
PF13540	Regulator of chromosome condensation (RCC1) repeat	4	4	1
PF13602	Zinc-binding dehydrogenase	4	4	1
PF13831	PHD-finger	4	4	1
PF13906	C-terminus of AA_permease	4	4	1
PF13959	Domain of unknown function (DUF4217)	4	4	1
PF14429	C2 domain in Dock180 and Zizimin proteins	4	4	1
PF15511	Centromere kinetochore component CENP-T histone fold	4	4	1
PF16124	RecQ zinc-binding	4	4	1
PF16214	Adenylyl cyclase N-terminal extracellular and transmembrane region	4	4	1
PF16905	Voltage-dependent L-type calcium channel, IQ-associated	4	4	1
PF16909	Vacuolar-sorting-associated 13 protein C-terminal	4	4	1
PF00086	Thyroglobulin type-1 repeat	3	3	1
PF00109	Beta-ketoacyl synthase, N-terminal domain	3	3	1
PF00117	Glutamine amidotransferase class-I	3	3	1
PF00137	ATP synthase subunit C	3	3	1
PF00156	Phosphoribosyl transferase domain	3	3	1
PF00167	Fibroblast growth factor	3	3	1
PF00191	Annexin	3	3	1
PF00206	Lyase	3	3	1
PF00207	Alpha-2-macroglobulin family	3	3	1
PF00210	Ferritin-like domain	3	3	1
PF00241	Cofilin/tropomyosin-type actin-binding protein	3	3	1
PF00245	Alkaline phosphatase	3	3	1
PF00258	Flavodoxin	3	3	1
PF00285	Citrate synthase, C-terminal domain	3	3	1
PF00287	Sodium / potassium ATPase beta chain	3	3	1
PF00289	Biotin carboxylase, N-terminal domain	3	3	1
PF00337	Galactoside-binding lectin	3	3	1
PF00362	Integrin beta chain VWA domain	3	3	1
PF00403	Heavy-metal-associated domain	3	3	1
PF00405	Transferrin	3	3	1
PF00408	Phosphoglucomutase/phosphomannomutase, C-terminal domain	3	3	1
PF00428	60s Acidic ribosomal protein	3	3	1
PF00483	Nucleotidyl transferase	3	3	1
PF00551	Formyl transferase	3	3	1
PF00562	RNA polymerase Rpb2, domain 6	3	3	1
PF00564	PB1 domain	3	3	1
PF00623	RNA polymerase Rpb1, domain 2	3	3	1
PF00629	MAM domain, meprin/A5/mu	3	3	1
PF00635	MSP (Major sperm protein) domain	3	3	1
PF00644	Poly(ADP-ribose) polymerase catalytic domain	3	3	1
PF00654	Voltage gated chloride channel	3	3	1
PF00687	Ribosomal protein L1p/L10e family	3	3	1
PF00698	Acyl transferase domain	3	3	1
PF00743	Flavin-binding monooxygenase-like	3	3	1
PF00749	tRNA synthetases class I (E and Q), catalytic domain	3	3	1
PF00755	Choline/Carnitine o-acyltransferase	3	3	1
PF00792	Phosphoinositide 3-kinase C2	3	3	1
PF00817	impB/mucB/samB family	3	3	1
PF00857	Isochorismatase family	3	3	1
PF00909	Ammonium Transporter Family	3	3	1
PF00962	Adenosine/AMP deaminase	3	3	1
PF00994	Probable molybdopterin binding domain	3	3	1
PF01019	Gamma-glutamyltranspeptidase	3	3	1
PF01055	Glycosyl hydrolases family 31	3	3	1
PF01062	Bestrophin, RFP-TM, chloride channel	3	3	1
PF01067	Calpain large subunit, domain III	3	3	1
PF01068	ATP dependent DNA ligase domain	3	3	1
PF01084	Ribosomal protein S18	3	3	1
PF01088	Ubiquitin carboxyl-terminal hydrolase, family 1	3	3	1
PF01135	Protein-L-isoaspartate(D-aspartate) O-methyltransferase (PCMT)	3	3	1
PF01161	Phosphatidylethanolamine-binding protein	3	3	1
PF01253	Translation initiation factor SUI1	3	3	1
PF01400	Astacin (Peptidase family M12A)	3	3	1
PF01408	Oxidoreductase family, NAD-binding Rossmann fold	3	3	1
PF01434	Peptidase family M41	3	3	1
PF01479	S4 domain	3	3	1
PF01480	PWI domain	3	3	1
PF01504	Phosphatidylinositol-4-phosphate 5-Kinase	3	3	1
PF01534	Frizzled/Smoothened family membrane region	3	3	1
PF01564	Spermine/spermidine synthase domain	3	3	1
PF01590	GAF domain	3	3	1
PF01652	Eukaryotic initiation factor 4E	3	3	1
PF01663	Type I phosphodiesterase / nucleotide pyrophosphatase	3	3	1
PF01683	EB module	3	3	1
PF01733	Nucleoside transporter	3	3	1
PF01749	Importin beta binding domain	3	3	1
PF01751	Toprim domain	3	3	1
PF01769	Divalent cation transporter	3	3	1
PF01798	snoRNA binding domain, fibrillarin	3	3	1
PF01851	Proteasome/cyclosome repeat	3	3	1
PF01981	Peptidyl-tRNA hydrolase PTH2	3	3	1
PF02017	CIDE-N domain	3	3	1
PF02121	Phosphatidylinositol transfer protein	3	3	1
PF02149	Kinase associated domain 1	3	3	1
PF02190	ATP-dependent protease La (LON) substrate-binding domain	3	3	1
PF02209	Villin headpiece domain	3	3	1
PF02225	PA domain	3	3	1
PF02257	RFX DNA-binding domain	3	3	1
PF02318	FYVE-type zinc finger	3	3	1
PF02319	E2F/DP family winged-helix DNA-binding domain	3	3	1
PF02375	jmjN domain	3	3	1
PF02437	SKI/SNO/DAC family	3	3	1
PF02709	N-terminal domain of galactosyltransferase	3	3	1
PF02769	AIR synthase related protein, C-terminal domain	3	3	1
PF02785	Biotin carboxylase C-terminal domain	3	3	1
PF02791	DDT domain	3	3	1
PF02801	Beta-ketoacyl synthase, C-terminal domain	3	3	1
PF02845	CUE domain	3	3	1
PF02852	Pyridine nucleotide-disulphide oxidoreductase, dimerisation domain	3	3	1
PF02862	DDHD domain	3	3	1
PF02878	Phosphoglucomutase/phosphomannomutase, alpha/beta/alpha domain I	3	3	1
PF02889	Sec63 Brl domain	3	3	1
PF02990	Endomembrane protein 70	3	3	1
PF02995	Protein of unknown function (DUF229)	3	3	1
PF03009	Glycerophosphoryl diester phosphodiesterase family	3	3	1
PF03016	Exostosin family	3	3	1
PF03029	Conserved hypothetical ATP binding protein	3	3	1
PF03097	BRO1-like domain	3	3	1
PF03131	bZIP Maf transcription factor	3	3	1
PF03178	CPSF A subunit region	3	3	1
PF03188	Eukaryotic cytochrome b561	3	3	1
PF03226	Yippee zinc-binding/DNA-binding /Mis18, centromere assembly	3	3	1
PF03366	YEATS family	3	3	1
PF03455	dDENN domain	3	3	1
PF03473	MOSC domain	3	3	1
PF03476	MOSC N-terminal beta barrel domain	3	3	1
PF03556	Cullin binding	3	3	1
PF03914	CBF/Mak21 family	3	3	1
PF04000	Sas10/Utp3/C1D family	3	3	1
PF04003	Dip2/Utp12 Family	3	3	1
PF04116	Fatty acid hydroxylase superfamily	3	3	1
PF04142	Nucleotide-sugar transporter	3	3	1
PF04178	Got1/Sft2-like family	3	3	1
PF04212	MIT (microtubule interacting and transport) domain	3	3	1
PF04218	CENP-B N-terminal DNA-binding domain	3	3	1
PF04547	Calcium-activated chloride channel	3	3	1
PF04560	RNA polymerase Rpb2, domain 7	3	3	1
PF04679	ATP dependent DNA ligase C terminal region	3	3	1
PF04707	PRELI-like family	3	3	1
PF04810	Sec23/Sec24 zinc finger	3	3	1
PF04811	Sec23/Sec24 trunk domain	3	3	1
PF04815	Sec23/Sec24 helical domain	3	3	1
PF04851	Type III restriction enzyme, res subunit	3	3	1
PF04857	CAF1 family ribonuclease	3	3	1
PF04893	Yip1 domain	3	3	1
PF04983	RNA polymerase Rpb1, domain 3	3	3	1
PF04997	RNA polymerase Rpb1, domain 1	3	3	1
PF04998	RNA polymerase Rpb1, domain 5	3	3	1
PF05000	RNA polymerase Rpb1, domain 4	3	3	1
PF05018	Protein of unknown function (DUF667)	3	3	1
PF05047	Mitochondrial ribosomal protein L51 / S25 / CI-B8 domain	3	3	1
PF05063	MT-A70	3	3	1
PF05746	DALR anticodon binding domain	3	3	1
PF05761	5' nucleotidase family	3	3	1
PF05964	F/Y-rich N-terminus	3	3	1
PF05965	F/Y rich C-terminus	3	3	1
PF06017	Unconventional myosin tail, actin- and lipid-binding	3	3	1
PF06119	Nidogen-like	3	3	1
PF06220	U1 zinc finger	3	3	1
PF06325	Ribosomal protein L11 methyltransferase (PrmA)	3	3	1
PF06456	Arfaptin-like domain	3	3	1
PF06650	SHR-binding domain of vacuolar-sorting associated protein 13	3	3	1
PF07162	Ciliary basal body-associated, B9 protein	3	3	1
PF07177	Neuralized	3	3	1
PF07521	Zn-dependent metallo-hydrolase RNA specificity domain	3	3	1
PF07524	Bromodomain associated	3	3	1
PF07533	BRK domain	3	3	1
PF07677	A-macroglobulin receptor	3	3	1
PF07678	A-macroglobulin complement component	3	3	1
PF07703	Alpha-2-macroglobulin family N-terminal region	3	3	1
PF07742	BTG family	3	3	1
PF07744	SPOC domain	3	3	1
PF07748	Glycosyl hydrolases family 38 C-terminal domain	3	3	1
PF07910	Peptidase family C78	3	3	1
PF08005	PHR domain	3	3	1
PF08033	Sec23/Sec24 beta-sandwich domain	3	3	1
PF08271	TFIIB zinc-binding	3	3	1
PF08409	Domain of unknown function (DUF1736)	3	3	1
PF08442	ATP-grasp domain	3	3	1
PF08447	PAS fold	3	3	1
PF08513	LisH	3	3	1
PF08515	Transforming growth factor beta type I GS-motif	3	3	1
PF08662	Eukaryotic translation initiation factor eIF2A	3	3	1
PF08700	Vps51/Vps67	3	3	1
PF09172	Domain of unknown function (DUF1943)	3	3	1
PF09258	Glycosyl transferase family 64 domain	3	3	1
PF09324	Domain of unknown function (DUF1981)	3	3	1
PF09325	Vps5 C terminal like	3	3	1
PF09336	Vps4 C terminal oligomerisation domain	3	3	1
PF10075	CSN8/PSMD8/EIF3K family	3	3	1
PF10373	Est1 DNA/RNA binding domain	3	3	1
PF10374	Telomerase activating protein Est1	3	3	1
PF10409	C2 domain of PTEN tumour-suppressor protein	3	3	1
PF10433	Mono-functional DNA-alkylating methyl methanesulfonate N-term	3	3	1
PF10513	Enhancer of polycomb-like	3	3	1
PF10517	Electron transfer DM13	3	3	1
PF10591	Secreted protein acidic and rich in cysteine Ca binding region	3	3	1
PF10609	NUBPL iron-transfer P-loop NTPase	3	3	1
PF11969	Scavenger mRNA decapping enzyme C-term binding	3	3	1
PF11976	Ubiquitin-2 like Rad60 SUMO-like	3	3	1
PF12130	Protein of unknown function (DUF3585)	3	3	1
PF12146	Serine aminopeptidase, S33	3	3	1
PF12348	CLASP N terminal	3	3	1
PF12736	Cell-cycle sustaining, positive selection,	3	3	1
PF12783	Guanine nucleotide exchange factor in Golgi transport N-terminal	3	3	1
PF12848	ABC transporter	3	3	1
PF12947	EGF domain	3	3	1
PF12998	Inhibitor of growth proteins N-terminal histone-binding	3	3	1
PF13091	PLD-like domain	3	3	1
PF13242	HAD-hyrolase-like	3	3	1
PF13419	Haloacid dehalogenase-like hydrolase	3	3	1
PF13621	Cupin-like domain	3	3	1
PF13638	PIN domain	3	3	1
PF13646	HEAT repeats	3	3	1
PF13649	Methyltransferase domain	3	3	1
PF13676	TIR domain	3	3	1
PF13679	Methyltransferase domain	3	3	1
PF13733	N-terminal region of glycosyl transferase group 7	3	3	1
PF13774	Regulated-SNARE-like domain	3	3	1
PF13877	Potential Monad-binding region of RPAP3	3	3	1
PF13909	C2H2-type zinc-finger domain	3	3	1
PF13913	zinc-finger of a C2HC-type	3	3	1
PF14520	Helix-hairpin-helix domain	3	3	1
PF15936	Domain of unknown function (DUF4749)	3	3	1
PF15998	Domain of unknown function (DUF4773)	3	3	1
PF16013	Domain of unknown function (DUF4781)	3	3	1
PF16076	Acyltransferase C-terminus	3	3	1
PF16186	Atypical Arm repeat	3	3	1
PF16300	Type of WD40 repeat	3	3	1
PF16746	BAR domain of APPL family	3	3	1
PF16870	2-oxoglutarate dehydrogenase C-terminal	3	3	1
PF16878	Transcriptional regulator, SIX1, N-terminal SD domain	3	3	1
PF16910	Repeating coiled region of VPS13	3	3	1
PF17171	Glutathione S-transferase, C-terminal domain	3	3	1
PF00023	Ankyrin repeat	2	2	1
PF00042	Globin	2	2	1
PF00044	Glyceraldehyde 3-phosphate dehydrogenase, NAD binding domain	2	2	1
PF00062	C-type lysozyme/alpha-lactalbumin family	2	2	1
PF00066	LNR domain	2	2	1
PF00113	Enolase, C-terminal TIM barrel domain	2	2	1
PF00132	Bacterial transferase hexapeptide (six repeats)	2	2	1
PF00164	Ribosomal protein S12/S23	2	2	1
PF00177	Ribosomal protein S7p/S5e	2	2	1
PF00181	Ribosomal Proteins L2, RNA binding domain	2	2	1
PF00224	Pyruvate kinase, barrel domain	2	2	1
PF00237	Ribosomal protein L22p/L17e	2	2	1
PF00238	Ribosomal protein L14p/L23e	2	2	1
PF00244	14-3-3 protein	2	2	1
PF00255	Glutathione peroxidase	2	2	1
PF00262	Calreticulin family	2	2	1
PF00274	Fructose-bisphosphate aldolase class-I	2	2	1
PF00276	Ribosomal protein L23	2	2	1
PF00297	Ribosomal protein L3	2	2	1
PF00298	Ribosomal protein L11, RNA binding domain	2	2	1
PF00312	Ribosomal protein S15	2	2	1
PF00313	'Cold-shock' DNA-binding domain	2	2	1
PF00318	Ribosomal protein S2	2	2	1
PF00319	SRF-type transcription factor (DNA-binding and dimerisation domain)	2	2	1
PF00327	Ribosomal protein L30p/L7e	2	2	1
PF00330	Aconitase family (aconitate hydratase)	2	2	1
PF00333	Ribosomal protein S5, N-terminal domain	2	2	1
PF00349	Hexokinase	2	2	1
PF00366	Ribosomal protein S17	2	2	1
PF00383	Cytidine and deoxycytidylate deaminase zinc-binding region	2	2	1
PF00390	Malic enzyme, N-terminal domain	2	2	1
PF00411	Ribosomal protein S11	2	2	1
PF00448	SRP54-type protein, GTPase domain	2	2	1
PF00450	Serine carboxypeptidase	2	2	1
PF00466	Ribosomal protein L10	2	2	1
PF00476	DNA polymerase family A	2	2	1
PF00478	IMP dehydrogenase / GMP reductase domain	2	2	1
PF00570	HRDC domain	2	2	1
PF00572	Ribosomal protein L13	2	2	1
PF00573	Ribosomal protein L4/L1 family	2	2	1
PF00586	AIR synthase related protein, N-terminal domain	2	2	1
PF00588	SpoU rRNA Methylase family	2	2	1
PF00596	Class II Aldolase and Adducin N-terminal domain	2	2	1
PF00614	Phospholipase D Active site motif	2	2	1
PF00645	Poly(ADP-ribose) polymerase and DNA-Ligase Zn-finger region	2	2	1
PF00658	Poly-adenylate binding protein, unique domain	2	2	1
PF00670	S-adenosyl-L-homocysteine hydrolase, NAD binding domain	2	2	1
PF00684	DnaJ central domain	2	2	1
PF00694	Aconitase C-terminal domain	2	2	1
PF00708	Acylphosphatase	2	2	1
PF00717	Peptidase S24-like	2	2	1
PF00723	Glycosyl hydrolases family 15	2	2	1
PF00725	3-hydroxyacyl-CoA dehydrogenase, C-terminal domain	2	2	1
PF00730	HhH-GPD superfamily base excision DNA repair protein	2	2	1
PF00736	EF-1 guanine nucleotide exchange domain	2	2	1
PF00750	tRNA synthetases class I (R)	2	2	1
PF00763	Tetrahydrofolate dehydrogenase/cyclohydrolase, catalytic domain	2	2	1
PF00769	Ezrin/radixin/moesin family	2	2	1
PF00778	DIX domain	2	2	1
PF00794	PI3-kinase family, ras-binding domain	2	2	1
PF00804	Syntaxin	2	2	1
PF00814	Glycoprotease family	2	2	1
PF00828	Ribosomal proteins 50S-L15, 50S-L18e, 60S-L27A	2	2	1
PF00868	Transglutaminase family	2	2	1
PF00875	DNA photolyase	2	2	1
PF00883	Cytosol aminopeptidase family, catalytic domain	2	2	1
PF00890	FAD binding domain	2	2	1
PF00903	Glyoxalase/Bleomycin resistance protein/Dioxygenase superfamily	2	2	1
PF00917	MATH domain	2	2	1
PF00927	Transglutaminase family, C-terminal ig like domain	2	2	1
PF00939	Sodium:sulfate symporter transmembrane region	2	2	1
PF00941	FAD binding domain in molybdopterin dehydrogenase	2	2	1
PF00955	HCO3- transporter family	2	2	1
PF00975	Thioesterase domain	2	2	1
PF00992	Troponin	2	2	1
PF00996	GDP dissociation inhibitor	2	2	1
PF01000	RNA polymerase Rpb3/RpoA insert domain	2	2	1
PF01007	Inward rectifier potassium channel	2	2	1
PF01012	Electron transfer flavoprotein domain	2	2	1
PF01018	GTP1/OBG	2	2	1
PF01026	TatD related DNase	2	2	1
PF01031	Dynamin central region	2	2	1
PF01039	Carboxyl transferase domain	2	2	1
PF01042	Endoribonuclease L-PSP	2	2	1
PF01049	Cadherin cytoplasmic region	2	2	1
PF01121	Dephospho-CoA kinase	2	2	1
PF01131	DNA topoisomerase	2	2	1
PF01137	RNA 3'-terminal phosphate cyclase	2	2	1
PF01163	RIO1 family	2	2	1
PF01167	Tub family	2	2	1
PF01170	Putative RNA methylase family UPF0020	2	2	1
PF01171	PP-loop family	2	2	1
PF01180	Dihydroorotate dehydrogenase	2	2	1
PF01182	Glucosamine-6-phosphate isomerases/6-phosphogluconolactonase	2	2	1
PF01193	RNA polymerase Rpb3/Rpb11 dimerisation domain	2	2	1
PF01201	Ribosomal protein S8e	2	2	1
PF01204	Trehalase	2	2	1
PF01243	Pyridoxamine 5'-phosphate oxidase	2	2	1
PF01246	Ribosomal protein L24e	2	2	1
PF01315	Aldehyde oxidase and xanthine dehydrogenase, a/b hammerhead domain	2	2	1
PF01321	Creatinase/Prolidase N-terminal domain	2	2	1
PF01410	Fibrillar collagen C-terminal domain	2	2	1
PF01411	tRNA synthetases class II (A)	2	2	1
PF01414	Delta serrate ligand	2	2	1
PF01417	ENTH domain	2	2	1
PF01432	Peptidase family M3	2	2	1
PF01435	Peptidase family M48	2	2	1
PF01451	Low molecular weight phosphotyrosine protein phosphatase	2	2	1
PF01472	PUA domain	2	2	1
PF01509	TruB family pseudouridylate synthase (N terminal domain)	2	2	1
PF01521	Iron-sulphur cluster biosynthesis	2	2	1
PF01522	Polysaccharide deacetylase	2	2	1
PF01546	Peptidase family M20/M25/M40	2	2	1
PF01557	Fumarylacetoacetate (FAA) hydrolase family	2	2	1
PF01565	FAD binding domain	2	2	1
PF01575	MaoC like domain	2	2	1
PF01583	Adenylylsulphate kinase	2	2	1
PF01591	6-phosphofructo-2-kinase	2	2	1
PF01603	Protein phosphatase 2A regulatory B subunit (B56 family)	2	2	1
PF01608	I/LWEQ domain	2	2	1
PF01624	MutS domain I	2	2	1
PF01661	Macro domain	2	2	1
PF01702	Queuine tRNA-ribosyltransferase	2	2	1
PF01704	UTP--glucose-1-phosphate uridylyltransferase	2	2	1
PF01712	Deoxynucleoside kinase	2	2	1
PF01747	ATP-sulfurylase	2	2	1
PF01754	A20-like zinc finger	2	2	1
PF01756	Acyl-CoA oxidase	2	2	1
PF01764	Lipase (class 3)	2	2	1
PF01778	Ribosomal L28e protein family	2	2	1
PF01799	[2Fe-2S] binding domain	2	2	1
PF01812	5-formyltetrahydrofolate cyclo-ligase family	2	2	1
PF01822	WSC domain	2	2	1
PF01825	GPCR proteolysis site, GPS, motif	2	2	1
PF01841	Transglutaminase-like superfamily	2	2	1
PF01843	DIL domain	2	2	1
PF01846	FF domain	2	2	1
PF01849	NAC domain	2	2	1
PF01866	Putative diphthamide synthesis protein	2	2	1
PF01873	Domain found in IF2B/IF5	2	2	1
PF01883	Iron-sulfur cluster assembly protein	2	2	1
PF01909	Nucleotidyltransferase domain	2	2	1
PF01918	Alba	2	2	1
PF01937	Protein of unknown function DUF89	2	2	1
PF01956	Integral membrane protein DUF106	2	2	1
PF01974	tRNA intron endonuclease, catalytic C-terminal domain	2	2	1
PF01997	Translin family	2	2	1
PF02055	Glycosyl hydrolase family 30 TIM-barrel domain	2	2	1
PF02096	60Kd inner membrane protein	2	2	1
PF02099	Josephin	2	2	1
PF02114	Phosducin	2	2	1
PF02137	Adenosine-deaminase (editase) domain	2	2	1
PF02140	Galactose binding lectin domain	2	2	1
PF02150	RNA polymerases M/15 Kd subunit	2	2	1
PF02197	Regulatory subunit of type II PKA R-subunit	2	2	1
PF02201	SWIB/MDM2 domain	2	2	1
PF02212	Dynamin GTPase effector domain	2	2	1
PF02213	GYF domain	2	2	1
PF02230	Phospholipase/Carboxylesterase	2	2	1
PF02234	Cyclin-dependent kinase inhibitor	2	2	1
PF02269	Transcription initiation factor IID, 18kD subunit	2	2	1
PF02271	Ubiquinol-cytochrome C reductase complex 14kD subunit	2	2	1
PF02301	HORMA domain	2	2	1
PF02359	Cell division protein 48 (CDC48), N-terminal domain	2	2	1
PF02366	Dolichyl-phosphate-mannose-protein mannosyltransferase	2	2	1
PF02376	CUT domain	2	2	1
PF02515	CoA-transferase family III	2	2	1
PF02516	Oligosaccharyl transferase STT3 subunit	2	2	1
PF02540	NAD synthase	2	2	1
PF02544	3-oxo-5-alpha-steroid 4-dehydrogenase	2	2	1
PF02550	Acetyl-CoA hydrolase/transferase N-terminal domain	2	2	1
PF02574	Homocysteine S-methyltransferase	2	2	1
PF02629	CoA binding domain	2	2	1
PF02733	Dak1 domain	2	2	1
PF02734	DAK2 domain	2	2	1
PF02735	Ku70/Ku80 beta-barrel domain	2	2	1
PF02736	Myosin N-terminal SH3-like domain	2	2	1
PF02737	3-hydroxyacyl-CoA dehydrogenase, NAD binding domain	2	2	1
PF02738	Molybdopterin-binding domain of aldehyde dehydrogenase	2	2	1
PF02755	RPEL repeat	2	2	1
PF02800	Glyceraldehyde 3-phosphate dehydrogenase, C-terminal domain	2	2	1
PF02806	Alpha amylase, C-terminal all-beta domain	2	2	1
PF02817	e3 binding domain	2	2	1
PF02822	Antistasin family	2	2	1
PF02836	Glycosyl hydrolases family 2, TIM barrel domain	2	2	1
PF02837	Glycosyl hydrolases family 2, sugar binding domain	2	2	1
PF02872	5'-nucleotidase, C-terminal domain	2	2	1
PF02879	Phosphoglucomutase/phosphomannomutase, alpha/beta/alpha domain II	2	2	1
PF02880	Phosphoglucomutase/phosphomannomutase, alpha/beta/alpha domain III	2	2	1
PF02881	SRP54-type protein, helical bundle domain	2	2	1
PF02882	Tetrahydrofolate dehydrogenase/cyclohydrolase, NAD(P)-binding domain	2	2	1
PF02891	MIZ/SP-RING zinc finger	2	2	1
PF02910	Fumarate reductase flavoprotein C-term	2	2	1
PF02911	Formyl transferase, C-terminal domain	2	2	1
PF02913	FAD linked oxidases, C-terminal domain	2	2	1
PF02921	Ubiquinol cytochrome reductase transmembrane region	2	2	1
PF02926	THUMP domain	2	2	1
PF02928	C5HC2 zinc finger	2	2	1
PF02933	Cell division protein 48 (CDC48), domain 2	2	2	1
PF02969	TATA box binding protein associated factor (TAF)	2	2	1
PF02991	Autophagy protein Atg8 ubiquitin like	2	2	1
PF03020	LEM domain	2	2	1
PF03045	DAN domain	2	2	1
PF03083	Sugar efflux transporter for intercellular exchange	2	2	1
PF03103	Domain of unknown function (DUF243)	2	2	1
PF03105	SPX domain	2	2	1
PF03124	EXS family	2	2	1
PF03127	GAT domain	2	2	1
PF03134	TB2/DP1, HVA22 family	2	2	1
PF03142	Chitin synthase	2	2	1
PF03159	XRN 5'-3' exonuclease N-terminus	2	2	1
PF03171	2OG-Fe(II) oxygenase superfamily	2	2	1
PF03177	Non-repetitive/WGA-negative nucleoporin C-terminal	2	2	1
PF03199	Eukaryotic glutathione synthase	2	2	1
PF03208	PRA1 family protein	2	2	1
PF03227	Gamma interferon inducible lysosomal thiol reductase (GILT)	2	2	1
PF03259	Roadblock/LC7 domain	2	2	1
PF03311	Cornichon protein	2	2	1
PF03359	Guanylate-kinase-associated protein (GKAP) protein	2	2	1
PF03360	Glycosyltransferase family 43	2	2	1
PF03368	Dicer dimerisation domain	2	2	1
PF03370	Carbohydrate/starch-binding module (family 21)	2	2	1
PF03371	PRP38 family	2	2	1
PF03388	Legume-like lectin family	2	2	1
PF03416	Peptidase family C54	2	2	1
PF03435	Saccharopine dehydrogenase NADP binding domain	2	2	1
PF03450	CO dehydrogenase flavoprotein C-terminal domain	2	2	1
PF03451	HELP motif	2	2	1
PF03463	eRF1 domain 1	2	2	1
PF03464	eRF1 domain 2	2	2	1
PF03465	eRF1 domain 3	2	2	1
PF03474	DMRTA motif	2	2	1
PF03483	B3/4 domain	2	2	1
PF03493	Calcium-activated BK potassium channel alpha subunit	2	2	1
PF03607	Doublecortin	2	2	1
PF03630	Fumble	2	2	1
PF03643	Vacuolar protein sorting-associated protein 26	2	2	1
PF03719	Ribosomal protein S5, C-terminal domain	2	2	1
PF03727	Hexokinase	2	2	1
PF03730	Ku70/Ku80 C-terminal arm	2	2	1
PF03782	AMOP domain	2	2	1
PF03798	TLC domain	2	2	1
PF03807	NADP oxidoreductase coenzyme F420-dependent	2	2	1
PF03820	Tricarboxylate carrier	2	2	1
PF03835	Rad4 transglutaminase-like domain	2	2	1
PF03853	YjeF-related protein N-terminus	2	2	1
PF03876	SHS2 domain found in N terminus of Rpb7p/Rpc25p/MJ0397	2	2	1
PF03909	BSD domain	2	2	1
PF03917	Eukaryotic glutathione synthase, ATP binding domain	2	2	1
PF03931	Skp1 family, tetramerisation domain	2	2	1
PF03942	DTW domain	2	2	1
PF03946	Ribosomal protein L11, N-terminal domain	2	2	1
PF03947	Ribosomal Proteins L2, C-terminal domain	2	2	1
PF03949	Malic enzyme, NAD binding domain	2	2	1
PF03950	tRNA synthetases class I (E and Q), anti-codon binding domain	2	2	1
PF03952	Enolase, N-terminal domain	2	2	1
PF03987	Autophagocytosis associated protein, active-site domain	2	2	1
PF04046	PSP	2	2	1
PF04053	Coatomer WD associated region	2	2	1
PF04068	Possible Fer4-like domain in RNase L inhibitor, RLI	2	2	1
PF04099	Sybindin-like family	2	2	1
PF04146	YT521-B-like domain	2	2	1
PF04153	NOT2 / NOT3 / NOT5 family	2	2	1
PF04157	EAP30/Vps36 family	2	2	1
PF04194	Programmed cell death protein 2, C-terminal putative domain	2	2	1
PF04258	Signal peptide peptidase	2	2	1
PF04280	Tim44-like domain	2	2	1
PF04387	Protein tyrosine phosphatase-like protein, PTPLA	2	2	1
PF04410	Gar1/Naf1 RNA binding region	2	2	1
PF04502	Family of unknown function (DUF572)	2	2	1
PF04511	Der1-like family	2	2	1
PF04515	Plasma-membrane choline transporter	2	2	1
PF04516	CP2 transcription factor	2	2	1
PF04572	Alpha 1,4-glycosyltransferase conserved region	2	2	1
PF04628	Sedlin, N-terminal conserved region	2	2	1
PF04641	Rtf2 RING-finger	2	2	1
PF04676	Protein similar to CwfJ C-terminus 2	2	2	1
PF04677	Protein similar to CwfJ C-terminus 1	2	2	1
PF04712	Radial spokehead-like protein	2	2	1
PF04727	ELMO/CED-12 family	2	2	1
PF04752	ChaC-like protein	2	2	1
PF04790	Sarcoglycan complex subunit protein	2	2	1
PF04825	N terminus of Rad21 / Rec8 like protein	2	2	1
PF04950	40S ribosome biogenesis protein Tsr1 and BMS1 C-terminal	2	2	1
PF05028	Poly (ADP-ribose) glycohydrolase (PARG)	2	2	1
PF05161	MOFRL family	2	2	1
PF05175	Methyltransferase small domain	2	2	1
PF05189	RNA 3'-terminal phosphate cyclase (RTC), insert domain	2	2	1
PF05191	Adenylate kinase, active site lid	2	2	1
PF05210	Sprouty protein (Spry)	2	2	1
PF05221	S-adenosyl-L-homocysteine hydrolase	2	2	1
PF05276	SH3 domain-binding protein 5 (SH3BP5)	2	2	1
PF05335	Protein of unknown function (DUF745)	2	2	1
PF05351	GMP-PDE, delta subunit	2	2	1
PF05478	Prominin	2	2	1
PF05529	B-cell receptor-associated protein 31-like	2	2	1
PF05602	Cleft lip and palate transmembrane protein 1 (CLPTM1)	2	2	1
PF05622	HOOK protein	2	2	1
PF05648	Peroxisomal biogenesis factor 11 (PEX11)	2	2	1
PF05670	Domain of unknown function (DUF814)	2	2	1
PF05679	Chondroitin N-acetylgalactosaminyltransferase	2	2	1
PF05705	Eukaryotic protein of unknown function (DUF829)	2	2	1
PF05712	MRG	2	2	1
PF05843	Suppressor of forked protein (Suf)	2	2	1
PF05903	PPPDE putative peptidase domain	2	2	1
PF05916	GINS complex protein	2	2	1
PF05972	APC 15 residue motif	2	2	1
PF06003	Survival motor neuron protein (SMN)	2	2	1
PF06031	SERTA motif	2	2	1
PF06068	TIP49 C-terminus	2	2	1
PF06201	PITH domain	2	2	1
PF06292	Domain of Unknown Function (DUF1041)	2	2	1
PF06294	CH-like domain in sperm protein	2	2	1
PF06327	Domain of Unknown Function (DUF1053)	2	2	1
PF06448	Domain of Unknown Function (DUF1081)	2	2	1
PF06467	MYM-type Zinc finger with FCS sequence motif	2	2	1
PF06472	ABC transporter transmembrane region 2	2	2	1
PF06631	Protein of unknown function (DUF1154)	2	2	1
PF06664	Wnt-binding factor required for Wnt secretion	2	2	1
PF06702	Golgi casein kinase, C-terminal, Fam20	2	2	1
PF06859	Bicoid-interacting protein 3 (Bin3)	2	2	1
PF07019	Rab5-interacting protein (Rab5ip)	2	2	1
PF07147	Mitochondrial 28S ribosomal protein S30 (PDCD9)	2	2	1
PF07159	Protein of unknown function (DUF1394)	2	2	1
PF07200	Modifier of rudimentary (Mod(r)) protein	2	2	1
PF07479	NAD-dependent glycerol-3-phosphate dehydrogenase C-terminus	2	2	1
PF07500	Transcription factor S-II (TFIIS), central domain	2	2	1
PF07528	DZF domain	2	2	1
PF07529	HSA	2	2	1
PF07531	NHR1 homology to TAF	2	2	1
PF07565	Band 3 cytoplasmic domain	2	2	1
PF07657	N terminus of Notch ligand	2	2	1
PF07687	Peptidase dimerisation domain	2	2	1
PF07724	AAA domain (Cdc48 subfamily)	2	2	1
PF07766	LETM1-like protein	2	2	1
PF07782	DC-STAMP-like protein	2	2	1
PF07842	GC-rich sequence DNA-binding factor-like protein	2	2	1
PF07856	Mediator of CRAC channel activity	2	2	1
PF07896	Protein of unknown function (DUF1674)	2	2	1
PF07970	Endoplasmic reticulum vesicle transporter	2	2	1
PF07973	Threonyl and Alanyl tRNA synthetase second additional domain	2	2	1
PF08059	SEP domain	2	2	1
PF08142	AARP2CN (NUC121) domain	2	2	1
PF08148	DSHCT (NUC185) domain	2	2	1
PF08150	FerB (NUC096) domain	2	2	1
PF08151	FerI (NUC094) domain	2	2	1
PF08154	NLE (NUC135) domain	2	2	1
PF08156	NOP5NT (NUC127) domain	2	2	1
PF08159	NUC153 domain	2	2	1
PF08174	Cell division protein anillin	2	2	1
PF08190	pre-RNA processing PIH1/Nop17	2	2	1
PF08238	Sel1 repeat	2	2	1
PF08265	YL1 nuclear protein C-terminal domain	2	2	1
PF08312	cwf21 domain	2	2	1
PF08337	Plexin cytoplasmic RasGAP domain	2	2	1
PF08366	LLGL2	2	2	1
PF08397	IRSp53/MIM homology domain	2	2	1
PF08416	Phosphotyrosine-binding domain	2	2	1
PF08450	SMP-30/Gluconolaconase/LRE-like region	2	2	1
PF08512	Histone chaperone Rttp106-like	2	2	1
PF08516	ADAM cysteine-rich	2	2	1
PF08585	RecQ mediated genome instability protein	2	2	1
PF08598	Sds3-like	2	2	1
PF08616	Stabilization of polarity axis	2	2	1
PF08628	Sorting nexin C terminal	2	2	1
PF08659	KR domain	2	2	1
PF08669	Glycine cleavage T-protein C-terminal barrel domain	2	2	1
PF08676	MutL C terminal dimerisation domain	2	2	1
PF08718	Glycolipid transfer protein (GLTP)	2	2	1
PF08726	Ca2+ insensitive EF hand	2	2	1
PF08742	C8 domain	2	2	1
PF08755	Hemimethylated DNA-binding protein YccV like	2	2	1
PF08763	Voltage gated calcium channel IQ domain	2	2	1
PF08766	DEK C terminal domain	2	2	1
PF08777	RNA binding motif	2	2	1
PF08782	c-SKI Smad4 binding domain	2	2	1
PF08799	pre-mRNA processing factor 4 (PRP4) like	2	2	1
PF08801	Nup133 N terminal like	2	2	1
PF08969	USP8 dimerisation domain	2	2	1
PF09079	CDC6, C terminal winged helix domain	2	2	1
PF09162	Tap, RNA-binding	2	2	1
PF09334	tRNA synthetases class I (M)	2	2	1
PF09335	SNARE associated Golgi protein	2	2	1
PF09360	Iron-binding zinc finger CDGSH type	2	2	1
PF09398	FOP N terminal dimerisation domain	2	2	1
PF09409	PUB domain	2	2	1
PF09457	FIP domain	2	2	1
PF09744	JNK_SAPK-associated protein-1	2	2	1
PF09750	Alternative splicing regulator	2	2	1
PF09753	Membrane fusion protein Use1	2	2	1
PF09794	Transport protein Avl9	2	2	1
PF09806	Cyclin-dependent kinase 2-associated protein	2	2	1
PF09811	Essential protein Yae1, N terminal	2	2	1
PF10186	Vacuolar sorting 38 and autophagy-related subunit 14	2	2	1
PF10192	Rhodopsin-like GPCR transmembrane domain	2	2	1
PF10220	Smg8_Smg9	2	2	1
PF10237	Probable N6-adenine methyltransferase	2	2	1
PF10250	GDP-fucose protein O-fucosyltransferase	2	2	1
PF10256	Golgin subfamily A member 7/ERF4 family	2	2	1
PF10257	Retinoic acid induced 16-like protein	2	2	1
PF10263	SprT-like family	2	2	1
PF10300	Protein of unknown function (DUF3808)	2	2	1
PF10324	Serpentine type 7TM GPCR chemoreceptor Srw	2	2	1
PF10358	N-terminal C2 in EEIG1 and EHBP1 proteins	2	2	1
PF10408	Ubiquitin elongating factor core	2	2	1
PF10431	C-terminal, D2-small domain, of ClpB protein	2	2	1
PF10475	Vacuolar-sorting protein 54, of GARP complex	2	2	1
PF10491	NLS-binding and DNA-binding and dimerisation domains of Nrf1	2	2	1
PF10523	BEN domain	2	2	1
PF10525	Engrailed homeobox C-terminal signature domain	2	2	1
PF10568	Outer mitochondrial membrane transport complex protein	2	2	1
PF10569	Alpha-macro-globulin thiol-ester bond-forming region	2	2	1
PF10587	Eukaryotic elongation factor 1 beta central acidic region	2	2	1
PF11018	Pupal cuticle protein C1	2	2	1
PF11527	The ARF-like 2 binding protein BART	2	2	1
PF11817	Foie gras liver health family 1	2	2	1
PF11878	Domain of unknown function (DUF3398)	2	2	1
PF11904	GPCR-chaperone	2	2	1
PF11938	TLR4 regulator and MIR-interacting MSAP	2	2	1
PF11987	Translation-initiation factor 2	2	2	1
PF12002	MgsA AAA+ ATPase C terminal	2	2	1
PF12036	Protein of unknown function (DUF3522)	2	2	1
PF12047	Cytosine specific DNA methyltransferase replication foci domain	2	2	1
PF12140	SLED domain	2	2	1
PF12202	Oxidative-stress-responsive kinase 1 C-terminal domain	2	2	1
PF12248	Farnesoic acid 0-methyl transferase	2	2	1
PF12265	Histone-binding protein RBBP4 or subunit C of CAF1 complex	2	2	1
PF12540	Protein of unknown function (DUF3736)	2	2	1
PF12756	C2H2 type zinc-finger (2 copies)	2	2	1
PF12999	Glucosidase II beta subunit-like	2	2	1
PF13017	piRNA pathway germ-plasm component	2	2	1
PF13085	2Fe-2S iron-sulfur cluster binding domain	2	2	1
PF13180	PDZ domain	2	2	1
PF13279	Thioesterase-like superfamily	2	2	1
PF13336	Acetyl-CoA hydrolase/transferase C-terminal domain	2	2	1
PF13374	Tetratricopeptide repeat	2	2	1
PF13393	Histidyl-tRNA synthetase	2	2	1
PF13489	Methyltransferase domain	2	2	1
PF13513	HEAT-like repeat	2	2	1
PF13522	Glutamine amidotransferase domain	2	2	1
PF13599	Pentapeptide repeats (9 copies)	2	2	1
PF13620	Carboxypeptidase regulatory-like domain	2	2	1
PF13656	RNA polymerase Rpb3/Rpb11 dimerisation domain	2	2	1
PF13660	Domain of unknown function (DUF4147)	2	2	1
PF13671	AAA domain	2	2	1
PF13793	N-terminal domain of ribose phosphate pyrophosphokinase	2	2	1
PF13802	Galactose mutarotase-like	2	2	1
PF13837	Myb/SANT-like DNA-binding domain	2	2	1
PF13850	Endoplasmic Reticulum-Golgi Intermediate Compartment (ERGIC)	2	2	1
PF13873	Myb/SANT-like DNA-binding domain	2	2	1
PF13879	KIAA1430 homologue	2	2	1
PF13893	RNA recognition motif. (a.k.a. RRM, RBD, or RNP domain)	2	2	1
PF13905	Thioredoxin-like	2	2	1
PF13917	Zinc knuckle	2	2	1
PF13949	ALIX V-shaped domain binding to HIV	2	2	1
PF14050	N-terminal conserved domain of Nudc.	2	2	1
PF14260	C4-type zinc-finger of DNA polymerase delta	2	2	1
PF14306	PUA-like domain	2	2	1
PF14360	PAP2 superfamily C-terminal	2	2	1
PF14377	Domain of unknown function (DUF4414)	2	2	1
PF14382	Exosome complex exonuclease RRP4 N-terminal region	2	2	1
PF14572	Phosphoribosyl synthetase-associated domain	2	2	1
PF14632	Acidic N-terminal SPT6	2	2	1
PF14633	SH2 domain	2	2	1
PF14635	Helix-hairpin-helix motif	2	2	1
PF14639	Holliday-junction resolvase-like of SPT6	2	2	1
PF14641	Helix-turn-helix DNA-binding domain of SPT6	2	2	1
PF14671	Dual specificity protein phosphatase, N-terminal half	2	2	1
PF14691	Dihydroprymidine dehydrogenase domain II, 4Fe-4S cluster	2	2	1
PF14712	Snapin/Pallidin	2	2	1
PF14748	Pyrroline-5-carboxylate reductase dimerisation	2	2	1
PF14765	Polyketide synthase dehydratase	2	2	1
PF14799	FAM195 family	2	2	1
PF14833	NAD-binding of NADP-dependent 3-hydroxyisobutyrate dehydrogenase	2	2	1
PF14878	Death-like domain of SPT6	2	2	1
PF14938	Soluble NSF attachment protein, SNAP	2	2	1
PF15275	PEHE domain	2	2	1
PF15636	GHH signature containing HNH/Endo VII superfamily nuclease toxin	2	2	1
PF15663	Zinc-finger containing family	2	2	1
PF15886	Carbohydrate binding domain (family 32)	2	2	1
PF15928	Domain of unknown function (DUF4746)	2	2	1
PF15985	KH domain	2	2	1
PF16027	Domain of unknown function (DUF4786)	2	2	1
PF16040	Domain of unknown function (DUF4792)	2	2	1
PF16060	Domain of unknown function (DUF4802)	2	2	1
PF16066	Domain of unknown function (DUF4808)	2	2	1
PF16078	2-oxoglutarate dehydrogenase N-terminus	2	2	1
PF16086	Domain of unknown function (DUF4816)	2	2	1
PF16178	Dimerisation domain of Ca+-activated chloride-channel, anoctamin	2	2	1
PF16188	C-terminal region of peptidase_M24	2	2	1
PF16189	Creatinase/Prolidase N-terminal domain	2	2	1
PF16192	C-terminal four TMM region of protein-O-mannosyltransferase	2	2	1
PF16193	AAA C-terminal domain	2	2	1
PF16197	Ketoacyl-synthetase C-terminal extension	2	2	1
PF16366	Cytoplasmic polyadenylation element-binding protein ZZ domain	2	2	1
PF16367	RNA recognition motif	2	2	1
PF16414	Niemann-Pick C1 N terminus	2	2	1
PF16421	E2F transcription factor CC-MB domain	2	2	1
PF16489	GPCR-Autoproteolysis INducing (GAIN) domain	2	2	1
PF16543	DRG Family Regulatory Proteins, Tma46	2	2	1
PF16566	Cell-cycle alteration and expression-elevated protein in tumour	2	2	1
PF16575	mRNA cleavage and polyadenylation factor CLP1 P-loop	2	2	1
PF16678	HOIP UBA domain pair	2	2	1
PF16770	Regulator of Ty1 transposition protein 107 BRCT domain	2	2	1
PF16880	N-terminal EH-domain containing protein	2	2	1
PF16891	Serine-threonine protein phosphatase N-terminal domain	2	2	1
PF16897	C-terminal region of MMR_HSR1 domain	2	2	1
PF16899	Cyclin C-terminal domain	2	2	1
PF17189	Glycosyl hydrolase family 30 beta sandwich domain	2	2	1
PF17205	Integrin plexin domain	2	2	1
PF17217	UPA domain	2	2	1
PF17284	Spermidine synthase tetramerisation domain	2	2	1
PF00020	TNFR/NGFR cysteine-rich region	1	1	1
PF00026	Eukaryotic aspartyl protease	1	1	1
PF00031	Cystatin domain	1	1	1
PF00037	4Fe-4S binding domain	1	1	1
PF00038	Intermediate filament protein	1	1	1
PF00068	Phospholipase A2	1	1	1
PF00075	RNase H	1	1	1
PF00081	Iron/manganese superoxide dismutases, alpha-hairpin domain	1	1	1
PF00088	Trefoil (P-type) domain	1	1	1
PF00120	Glutamine synthetase, catalytic domain	1	1	1
PF00121	Triosephosphate isomerase	1	1	1
PF00159	Pancreatic hormone peptide	1	1	1
PF00162	Phosphoglycerate kinase	1	1	1
PF00163	Ribosomal protein S4/S9 N-terminal domain	1	1	1
PF00166	Chaperonin 10 Kd subunit	1	1	1
PF00174	Oxidoreductase molybdopterin binding domain	1	1	1
PF00185	Aspartate/ornithine carbamoyltransferase, Asp/Orn binding domain	1	1	1
PF00186	Dihydrofolate reductase	1	1	1
PF00189	Ribosomal protein S3, C-terminal domain	1	1	1
PF00199	Catalase	1	1	1
PF00203	Ribosomal protein S19	1	1	1
PF00204	DNA gyrase B	1	1	1
PF00208	Glutamate/Leucine/Phenylalanine/Valine dehydrogenase	1	1	1
PF00213	ATP synthase delta (OSCP) subunit	1	1	1
PF00215	Orotidine 5'-phosphate decarboxylase / HUMPS family	1	1	1
PF00231	ATP synthase	1	1	1
PF00232	Glycosyl hydrolase family 1	1	1	1
PF00235	Profilin	1	1	1
PF00268	Ribonucleotide reductase, small chain	1	1	1
PF00278	Pyridoxal-dependent decarboxylase, C-terminal sheet domain	1	1	1
PF00281	Ribosomal protein L5	1	1	1
PF00306	ATP synthase alpha/beta chain, C terminal domain	1	1	1
PF00310	Glutamine amidotransferases class-II	1	1	1
PF00316	Fructose-1-6-bisphosphatase, N-terminal domain	1	1	1
PF00317	Ribonucleotide reductase, all-alpha domain	1	1	1
PF00329	Respiratory-chain NADH dehydrogenase, 30 Kd subunit	1	1	1
PF00342	Phosphoglucose isomerase	1	1	1
PF00343	Carbohydrate phosphorylase	1	1	1
PF00344	SecY translocase	1	1	1
PF00346	Respiratory-chain NADH dehydrogenase, 49 Kd subunit	1	1	1
PF00347	Ribosomal protein L6	1	1	1
PF00365	Phosphofructokinase	1	1	1
PF00368	Hydroxymethylglutaryl-coenzyme A reductase	1	1	1
PF00384	Molybdopterin oxidoreductase	1	1	1
PF00393	6-phosphogluconate dehydrogenase, C-terminal domain	1	1	1
PF00410	Ribosomal protein S8	1	1	1
PF00416	Ribosomal protein S13/S18	1	1	1
PF00418	Tau and MAP protein, tubulin-binding repeat	1	1	1
PF00436	Single-strand binding protein family	1	1	1
PF00438	S-adenosylmethionine synthetase, N-terminal domain	1	1	1
PF00453	Ribosomal protein L20	1	1	1
PF00456	Transketolase, thiamine diphosphate binding domain	1	1	1
PF00464	Serine hydroxymethyltransferase	1	1	1
PF00468	Ribosomal protein L34	1	1	1
PF00473	Corticotropin-releasing factor family	1	1	1
PF00479	Glucose-6-phosphate dehydrogenase, NAD binding domain	1	1	1
PF00484	Carbonic anhydrase	1	1	1
PF00490	Delta-aminolevulinic acid dehydratase	1	1	1
PF00491	Arginase family	1	1	1
PF00494	Squalene/phytoene synthase	1	1	1
PF00521	DNA gyrase/topoisomerase IV, subunit A	1	1	1
PF00542	Ribosomal protein L7/L12 C-terminal domain	1	1	1
PF00565	Staphylococcal nuclease homologue	1	1	1
PF00574	Clp protease	1	1	1
PF00576	HIUase/Transthyretin family	1	1	1
PF00584	SecE/Sec61-gamma subunits of protein translocation complex	1	1	1
PF00590	Tetrapyrrole (Corrin/Porphyrin) Methylases	1	1	1
PF00633	Helix-hairpin-helix motif	1	1	1
PF00639	PPIC-type PPIASE domain	1	1	1
PF00647	Elongation factor 1 gamma, conserved domain	1	1	1
PF00673	ribosomal L5P family C-terminus	1	1	1
PF00686	Starch binding domain	1	1	1
PF00692	dUTPase	1	1	1
PF00696	Amino acid kinase family	1	1	1
PF00705	Proliferating cell nuclear antigen, N-terminal domain	1	1	1
PF00709	Adenylosuccinate synthetase	1	1	1
PF00710	Asparaginase, N-terminal	1	1	1
PF00719	Inorganic pyrophosphatase	1	1	1
PF00722	Glycosyl hydrolases family 16	1	1	1
PF00731	AIR carboxylase	1	1	1
PF00756	Putative esterase	1	1	1
PF00759	Glycosyl hydrolase family 9	1	1	1
PF00762	Ferrochelatase	1	1	1
PF00764	Arginosuccinate synthase	1	1	1
PF00766	Electron transfer flavoprotein FAD-binding domain	1	1	1
PF00805	Pentapeptide repeats (8 copies)	1	1	1
PF00806	Pumilio-family RNA binding repeat	1	1	1
PF00810	ER lumen protein retaining receptor	1	1	1
PF00812	Ephrin	1	1	1
PF00821	Phosphoenolpyruvate carboxykinase C-terminal P-loop domain	1	1	1
PF00822	PMP-22/EMP/MP20/Claudin family	1	1	1
PF00827	Ribosomal L15	1	1	1
PF00829	Ribosomal prokaryotic L21 protein	1	1	1
PF00831	Ribosomal L29 protein	1	1	1
PF00833	Ribosomal S17	1	1	1
PF00834	Ribulose-phosphate 3 epimerase family	1	1	1
PF00835	SNAP-25 family	1	1	1
PF00836	Stathmin family	1	1	1
PF00838	Translationally controlled tumour protein	1	1	1
PF00839	Cysteine rich repeat	1	1	1
PF00854	POT family	1	1	1
PF00860	Permease family	1	1	1
PF00870	P53 DNA-binding domain	1	1	1
PF00878	Cation-independent mannose-6-phosphate receptor repeat	1	1	1
PF00881	Nitroreductase family	1	1	1
PF00886	Ribosomal protein S16	1	1	1
PF00889	Elongation factor TS	1	1	1
PF00900	Ribosomal family S4e	1	1	1
PF00923	Transaldolase/Fructose-6-phosphate aldolase	1	1	1
PF00932	Lamin Tail Domain	1	1	1
PF00935	Ribosomal protein L44	1	1	1
PF00940	DNA-dependent RNA polymerase	1	1	1
PF00953	Glycosyl transferase family 4	1	1	1
PF00958	GMP synthase C terminal domain	1	1	1
PF00982	Glycosyltransferase family 20	1	1	1
PF00984	UDP-glucose/GDP-mannose dehydrogenase family, central domain	1	1	1
PF00988	Carbamoyl-phosphate synthase small chain, CPSase domain	1	1	1
PF01015	Ribosomal S3Ae family	1	1	1
PF01016	Ribosomal L27 protein	1	1	1
PF01017	STAT protein, all-alpha domain	1	1	1
PF01020	Ribosomal L40e family	1	1	1
PF01025	GrpE	1	1	1
PF01028	Eukaryotic DNA topoisomerase I, catalytic core	1	1	1
PF01033	Somatomedin B domain	1	1	1
PF01035	6-O-methylguanine DNA methyltransferase, DNA binding domain	1	1	1
PF01053	Cys/Met metabolism PLP-dependent enzyme	1	1	1
PF01058	NADH ubiquinone oxidoreductase, 20 Kd subunit	1	1	1
PF01063	Amino-transferase class IV	1	1	1
PF01071	Phosphoribosylglycinamide synthetase, ATP-grasp (A) domain	1	1	1
PF01079	Hint module	1	1	1
PF01080	Presenilin	1	1	1
PF01086	Clathrin light chain	1	1	1
PF01090	Ribosomal protein S19e	1	1	1
PF01091	PTN/MK heparin-binding protein family, C-terminal domain	1	1	1
PF01092	Ribosomal protein S6e	1	1	1
PF01103	Surface antigen	1	1	1
PF01106	NifU-like domain	1	1	1
PF01115	F-actin capping protein, beta subunit	1	1	1
PF01120	Alpha-L-fucosidase	1	1	1
PF01122	Eukaryotic cobalamin-binding protein	1	1	1
PF01124	MAPEG family	1	1	1
PF01125	G10 protein	1	1	1
PF01126	Heme oxygenase	1	1	1
PF01127	Succinate dehydrogenase/Fumarate reductase transmembrane subunit	1	1	1
PF01133	Enhancer of rudimentary	1	1	1
PF01134	Glucose inhibited division protein A	1	1	1
PF01139	tRNA-splicing ligase RtcB	1	1	1
PF01142	tRNA pseudouridine synthase D (TruD)	1	1	1
PF01144	Coenzyme A transferase	1	1	1
PF01146	Caveolin	1	1	1
PF01148	Cytidylyltransferase family	1	1	1
PF01154	Hydroxymethylglutaryl-coenzyme A synthase N terminal	1	1	1
PF01156	Inosine-uridine preferring nucleoside hydrolase	1	1	1
PF01157	Ribosomal protein L21e	1	1	1
PF01158	Ribosomal protein L36e	1	1	1
PF01159	Ribosomal protein L6e	1	1	1
PF01165	Ribosomal protein S21	1	1	1
PF01166	TSC-22/dip/bun family	1	1	1
PF01168	Alanine racemase, N-terminal domain	1	1	1
PF01169	Uncharacterized protein family UPF0016	1	1	1
PF01172	Shwachman-Bodian-Diamond syndrome (SBDS) protein	1	1	1
PF01186	Lysyl oxidase	1	1	1
PF01191	RNA polymerase Rpb5, C-terminal domain	1	1	1
PF01192	RNA polymerase Rpb6	1	1	1
PF01194	RNA polymerases N / 8 kDa subunit	1	1	1
PF01196	Ribosomal protein L17	1	1	1
PF01198	Ribosomal protein L31e	1	1	1
PF01199	Ribosomal protein L34e	1	1	1
PF01208	Uroporphyrinogen decarboxylase (URO-D)	1	1	1
PF01209	ubiE/COQ5 methyltransferase family	1	1	1
PF01213	Adenylate cyclase associated (CAP) N terminal	1	1	1
PF01214	Casein kinase II regulatory subunit	1	1	1
PF01215	Cytochrome c oxidase subunit Vb	1	1	1
PF01218	Coproporphyrinogen III oxidase	1	1	1
PF01223	DNA/RNA non-specific endonuclease	1	1	1
PF01227	GTP cyclohydrolase I	1	1	1
PF01230	HIT domain	1	1	1
PF01233	Myristoyl-CoA:protein N-myristoyltransferase, N-terminal domain	1	1	1
PF01238	Phosphomannose isomerase type I	1	1	1
PF01242	6-pyruvoyl tetrahydropterin synthase	1	1	1
PF01245	Ribosomal protein L19	1	1	1
PF01247	Ribosomal protein L35Ae	1	1	1
PF01249	Ribosomal protein S21e	1	1	1
PF01250	Ribosomal protein S6	1	1	1
PF01251	Ribosomal protein S7e	1	1	1
PF01256	Carbohydrate kinase	1	1	1
PF01257	Thioredoxin-like [2Fe-2S] ferredoxin	1	1	1
PF01259	SAICAR synthetase	1	1	1
PF01261	Xylose isomerase-like TIM barrel	1	1	1
PF01265	Cytochrome c/c1 heme lyase	1	1	1
PF01267	F-actin capping protein alpha subunit	1	1	1
PF01268	Formate--tetrahydrofolate ligase	1	1	1
PF01269	Fibrillarin	1	1	1
PF01275	Myelin proteolipid protein (PLP or lipophilin)	1	1	1
PF01280	Ribosomal protein L19e	1	1	1
PF01281	Ribosomal protein L9, N-terminal domain	1	1	1
PF01282	Ribosomal protein S24e	1	1	1
PF01286	XPA protein N-terminal	1	1	1
PF01287	Eukaryotic elongation factor 5A hypusine, DNA-binding OB fold	1	1	1
PF01290	Thymosin beta-4 family	1	1	1
PF01294	Ribosomal protein L13e	1	1	1
PF01300	Telomere recombination	1	1	1
PF01301	Glycosyl hydrolases family 35	1	1	1
PF01327	Polypeptide deformylase	1	1	1
PF01329	Pterin 4 alpha carbinolamine dehydratase	1	1	1
PF01331	mRNA capping enzyme, catalytic domain	1	1	1
PF01342	SAND domain	1	1	1
PF01351	Ribonuclease HII	1	1	1
PF01372	Melittin	1	1	1
PF01379	Porphobilinogen deaminase, dipyromethane cofactor binding domain	1	1	1
PF01380	SIS domain	1	1	1
PF01381	Helix-turn-helix	1	1	1
PF01384	Phosphate transporter family	1	1	1
PF01393	Chromo shadow domain	1	1	1
PF01394	Clathrin propeller repeat	1	1	1
PF01396	Topoisomerase DNA binding C4 zinc finger	1	1	1
PF01404	Ephrin receptor ligand binding domain	1	1	1
PF01422	NF-X1 type zinc finger	1	1	1
PF01454	MAGE family	1	1	1
PF01457	Leishmanolysin	1	1	1
PF01466	Skp1 family, dimerisation domain	1	1	1
PF01470	Pyroglutamyl peptidase	1	1	1
PF01476	LysM domain	1	1	1
PF01477	PLAT/LH2 domain	1	1	1
PF01491	Frataxin-like domain	1	1	1
PF01493	GXGXG motif	1	1	1
PF01498	Transposase	1	1	1
PF01507	Phosphoadenosine phosphosulfate reductase family	1	1	1
PF01512	Respiratory-chain NADH dehydrogenase 51 Kd subunit	1	1	1
PF01531	Glycosyl transferase family 11	1	1	1
PF01536	Adenosylmethionine decarboxylase	1	1	1
PF01541	GIY-YIG catalytic domain	1	1	1
PF01566	Natural resistance-associated macrophage protein	1	1	1
PF01586	Myogenic Basic domain	1	1	1
PF01588	Putative tRNA binding domain	1	1	1
PF01592	NifU-like N terminal domain	1	1	1
PF01595	Domain of unknown function DUF21	1	1	1
PF01597	Glycine cleavage H-protein	1	1	1
PF01599	Ribosomal protein S27a	1	1	1
PF01619	Proline dehydrogenase	1	1	1
PF01625	Peptide methionine sulfoxide reductase	1	1	1
PF01630	Hyaluronidase	1	1	1
PF01632	Ribosomal protein L35	1	1	1
PF01641	SelR domain	1	1	1
PF01645	Conserved region in glutamate synthase	1	1	1
PF01650	Peptidase C13 family	1	1	1
PF01655	Ribosomal protein L32	1	1	1
PF01658	Myo-inositol-1-phosphate synthase	1	1	1
PF01667	Ribosomal protein S27	1	1	1
PF01687	Riboflavin kinase	1	1	1
PF01693	Caulimovirus viroplasmin	1	1	1
PF01709	Transcriptional regulator	1	1	1
PF01725	Ham1 family	1	1	1
PF01743	Poly A polymerase head domain	1	1	1
PF01755	Glycosyltransferase family 25 (LPS biosynthesis protein)	1	1	1
PF01765	Ribosome recycling factor	1	1	1
PF01770	Reduced folate carrier	1	1	1
PF01775	Ribosomal proteins 50S-L18Ae/60S-L20/60S-L18A	1	1	1
PF01776	Ribosomal L22e protein family	1	1	1
PF01777	Ribosomal L27e protein family	1	1	1
PF01779	Ribosomal L29e protein family	1	1	1
PF01780	Ribosomal L37ae protein family	1	1	1
PF01781	Ribosomal L38e protein family	1	1	1
PF01784	NIF3 (NGG1p interacting factor 3)	1	1	1
PF01791	DeoC/LacD family aldolase	1	1	1
PF01795	MraW methylase family	1	1	1
PF01808	AICARFT/IMPCHase bienzyme	1	1	1
PF01813	ATP synthase subunit D	1	1	1
PF01834	XRCC1 N terminal domain	1	1	1
PF01847	VHL beta domain	1	1	1
PF01857	Retinoblastoma-associated protein B domain	1	1	1
PF01858	Retinoblastoma-associated protein A domain	1	1	1
PF01868	Domain of unknown function UPF0086	1	1	1
PF01869	BadF/BadG/BcrA/BcrD ATPase family	1	1	1
PF01894	Uncharacterised protein family UPF0047	1	1	1
PF01896	DNA primase small subunit	1	1	1
PF01902	Diphthamide synthase	1	1	1
PF01907	Ribosomal protein L37e	1	1	1
PF01912	eIF-6 family	1	1	1
PF01916	Deoxyhypusine synthase	1	1	1
PF01922	SRP19 protein	1	1	1
PF01923	Cobalamin adenosyltransferase	1	1	1
PF01927	Mut7-C RNAse domain	1	1	1
PF01929	Ribosomal protein L14	1	1	1
PF01931	Protein of unknown function DUF84	1	1	1
PF01936	NYN domain	1	1	1
PF01940	Integral membrane protein DUF92	1	1	1
PF01963	TraB family	1	1	1
PF01965	DJ-1/PfpI family	1	1	1
PF01967	MoaC family	1	1	1
PF01968	Hydantoinase/oxoprolinase	1	1	1
PF01980	Uncharacterised protein family UPF0066	1	1	1
PF01984	Double-stranded DNA-binding domain	1	1	1
PF01991	ATP synthase (E/31 kDa) subunit	1	1	1
PF01992	ATP synthase (C/AC39) subunit	1	1	1
PF02002	TFIIE alpha subunit	1	1	1
PF02005	N2,N2-dimethylguanosine tRNA methyltransferase	1	1	1
PF02045	CCAAT-binding transcription factor (CBF-B/NF-YA) subunit B	1	1	1
PF02064	MAS20 protein import receptor	1	1	1
PF02077	SURF4 family	1	1	1
PF02078	Synapsin, N-terminal domain	1	1	1
PF02100	Ornithine decarboxylase antizyme	1	1	1
PF02101	Ocular albinism type 1 protein	1	1	1
PF02104	SURF1 family	1	1	1
PF02109	DAD family	1	1	1
PF02115	RHO protein GDP dissociation inhibitor	1	1	1
PF02126	Phosphotriesterase family	1	1	1
PF02144	Repair protein Rad1/Rec1/Rad17	1	1	1
PF02163	Peptidase family M50	1	1	1
PF02173	pKID domain	1	1	1
PF02176	TRAF-type zinc finger	1	1	1
PF02177	Amyloid A4 N-terminal heparin-binding	1	1	1
PF02179	BAG domain	1	1	1
PF02184	HAT (Half-A-TPR) repeat	1	1	1
PF02186	TFIIE beta subunit core domain	1	1	1
PF02192	PI3-kinase family, p85-binding domain	1	1	1
PF02199	Saposin A-type domain	1	1	1
PF02205	WH2 motif	1	1	1
PF02219	Methylenetetrahydrofolate reductase	1	1	1
PF02223	Thymidylate kinase	1	1	1
PF02229	Transcriptional Coactivator p15 (PC4)	1	1	1
PF02237	Biotin protein ligase C terminal domain	1	1	1
PF02251	Proteasome activator pa28 alpha subunit	1	1	1
PF02252	Proteasome activator pa28 beta subunit	1	1	1
PF02262	CBL proto-oncogene N-terminal domain 1	1	1	1
PF02263	Guanylate-binding protein, N-terminal domain	1	1	1
PF02268	Transcription initiation factor IIA, gamma subunit, helical domain	1	1	1
PF02270	Transcription initiation factor IIF, beta subunit	1	1	1
PF02272	DHHA1 domain	1	1	1
PF02284	Cytochrome c oxidase subunit Va	1	1	1
PF02290	Signal recognition particle 14kD protein	1	1	1
PF02291	Transcription initiation factor IID, 31kD subunit	1	1	1
PF02296	Alpha adaptin AP2, C-terminal domain	1	1	1
PF02312	Core binding factor beta subunit	1	1	1
PF02320	Ubiquinol-cytochrome C reductase hinge protein	1	1	1
PF02330	Mitochondrial glycoprotein	1	1	1
PF02347	Glycine cleavage system P-protein	1	1	1
PF02358	Trehalose-phosphatase	1	1	1
PF02374	Anion-transporting ATPase	1	1	1
PF02377	Dishevelled specific domain	1	1	1
PF02390	Putative methyltransferase	1	1	1
PF02403	Seryl-tRNA synthetase N-terminal domain	1	1	1
PF02410	Ribosomal silencing factor during starvation	1	1	1
PF02412	Thrombospondin type 3 repeat	1	1	1
PF02436	Conserved carboxylase domain	1	1	1
PF02441	Flavoprotein	1	1	1
PF02450	Lecithin:cholesterol acyltransferase	1	1	1
PF02453	Reticulon	1	1	1
PF02485	Core-2/I-Branching enzyme	1	1	1
PF02487	CLN3 protein	1	1	1
PF02493	MORN repeat	1	1	1
PF02517	CAAX protease self-immunity	1	1	1
PF02538	Hydantoinase B/oxoprolinase	1	1	1
PF02545	Maf-like protein	1	1	1
PF02580	D-Tyr-tRNA(Tyr) deacylase	1	1	1
PF02582	Uncharacterised ACR, YagE family COG1723	1	1	1
PF02585	GlcNAc-PI de-N-acetylase	1	1	1
PF02586	SOS response associated peptidase (SRAP)	1	1	1
PF02594	Uncharacterised ACR, YggU family COG1872	1	1	1
PF02598	Putative RNA methyltransferase	1	1	1
PF02602	Uroporphyrinogen-III synthase HemD	1	1	1
PF02615	Malate/L-lactate dehydrogenase	1	1	1
PF02617	ATP-dependent Clp protease adaptor protein ClpS	1	1	1
PF02628	Cytochrome oxidase assembly protein	1	1	1
PF02630	SCO1/SenC	1	1	1
PF02636	Putative S-adenosyl-L-methionine-dependent methyltransferase	1	1	1
PF02637	GatB domain	1	1	1
PF02661	Fic/DOC family	1	1	1
PF02666	Phosphatidylserine decarboxylase	1	1	1
PF02671	Paired amphipathic helix repeat	1	1	1
PF02714	Calcium-dependent channel, 7TM region, putative phosphate	1	1	1
PF02724	CDC45-like protein	1	1	1
PF02729	Aspartate/ornithine carbamoyltransferase, carbamoyl-P binding domain	1	1	1
PF02731	SKIP/SNW domain	1	1	1
PF02744	Galactose-1-phosphate uridyl transferase, C-terminal domain	1	1	1
PF02746	Mandelate racemase / muconate lactonizing enzyme, N-terminal domain	1	1	1
PF02747	Proliferating cell nuclear antigen, C-terminal domain	1	1	1
PF02750	Synapsin, ATP binding domain	1	1	1
PF02751	Transcription initiation factor IIA, gamma subunit	1	1	1
PF02761	CBL proto-oncogene N-terminus, EF hand-like domain	1	1	1
PF02762	CBL proto-oncogene N-terminus, SH2-like domain	1	1	1
PF02772	S-adenosylmethionine synthetase, central domain	1	1	1
PF02773	S-adenosylmethionine synthetase, C-terminal domain	1	1	1
PF02775	Thiamine pyrophosphate enzyme, C-terminal TPP binding domain	1	1	1
PF02777	Iron/manganese superoxide dismutases, C-terminal domain	1	1	1
PF02781	Glucose-6-phosphate dehydrogenase, C-terminal domain	1	1	1
PF02784	Pyridoxal-dependent decarboxylase, pyridoxal binding domain	1	1	1
PF02787	Carbamoyl-phosphate synthetase large chain, oligomerisation domain	1	1	1
PF02789	Cytosol aminopeptidase family, N-terminal domain	1	1	1
PF02799	Myristoyl-CoA:protein N-myristoyltransferase, C-terminal domain	1	1	1
PF02812	Glu/Leu/Phe/Val dehydrogenase, dimerisation domain	1	1	1
PF02823	ATP synthase, Delta/Epsilon chain, beta-sandwich domain	1	1	1
PF02827	cAMP-dependent protein kinase inhibitor	1	1	1
PF02833	DHHA2 domain	1	1	1
PF02838	Glycosyl hydrolase family 20, domain 2	1	1	1
PF02840	Prp18 domain	1	1	1
PF02841	Guanylate-binding protein, C-terminal domain	1	1	1
PF02843	Phosphoribosylglycinamide synthetase, C domain	1	1	1
PF02844	Phosphoribosylglycinamide synthetase, N domain	1	1	1
PF02864	STAT protein, DNA binding domain	1	1	1
PF02865	STAT protein, protein interaction domain	1	1	1
PF02867	Ribonucleotide reductase, barrel domain	1	1	1
PF02877	Poly(ADP-ribose) polymerase, regulatory domain	1	1	1
PF02894	Oxidoreductase family, C-terminal alpha/beta domain	1	1	1
PF02897	Prolyl oligopeptidase, N-terminal beta-propeller domain	1	1	1
PF02898	Nitric oxide synthase, oxygenase domain	1	1	1
PF02906	Iron only hydrogenase large subunit, C-terminal domain	1	1	1
PF02919	Eukaryotic DNA topoisomerase I, DNA binding fragment	1	1	1
PF02922	Carbohydrate-binding module 48 (Isoamylase N-terminal domain)	1	1	1
PF02934	GatB/GatE catalytic domain	1	1	1
PF02936	Cytochrome c oxidase subunit IV	1	1	1
PF02937	Cytochrome c oxidase subunit VIc	1	1	1
PF02961	Barrier to autointegration factor	1	1	1
PF02966	Mitosis protein DIM1	1	1	1
PF02970	Tubulin binding cofactor A	1	1	1
PF02978	Signal peptide binding domain	1	1	1
PF03034	Phosphatidyl serine synthase	1	1	1
PF03051	Peptidase C1-like family	1	1	1
PF03054	tRNA methyl transferase	1	1	1
PF03055	Retinal pigment epithelial membrane protein	1	1	1
PF03061	Thioesterase superfamily	1	1	1
PF03066	Nucleoplasmin/nucleophosmin domain	1	1	1
PF03071	GNT-I family	1	1	1
PF03073	TspO/MBR family	1	1	1
PF03074	Glutamate-cysteine ligase	1	1	1
PF03079	ARD/ARD' family	1	1	1
PF03081	Exo70 exocyst complex subunit	1	1	1
PF03088	Strictosidine synthase	1	1	1
PF03091	CutA1 divalent ion tolerance protein	1	1	1
PF03095	Phosphotyrosyl phosphate activator (PTPA) protein	1	1	1
PF03096	Ndr family	1	1	1
PF03101	FAR1 DNA-binding domain	1	1	1
PF03121	Herpesviridae UL52/UL70 DNA primase	1	1	1
PF03126	Plus-3 domain	1	1	1
PF03145	Seven in absentia protein family	1	1	1
PF03152	Ubiquitin fusion degradation protein UFD1	1	1	1
PF03153	Transcription factor IIA, alpha/beta subunit	1	1	1
PF03154	Atrophin-1 family	1	1	1
PF03164	Trafficking protein Mon1	1	1	1
PF03179	Vacuolar (H+)-ATPase G subunit	1	1	1
PF03190	Protein of unknown function, DUF255	1	1	1
PF03200	Glycosyl hydrolase family 63 C-terminal domain	1	1	1
PF03215	Rad17 cell cycle checkpoint protein	1	1	1
PF03223	V-ATPase subunit C	1	1	1
PF03224	V-ATPase subunit H	1	1	1
PF03234	Cdc37 N terminal kinase binding	1	1	1
PF03248	Rer1 family	1	1	1
PF03250	Tropomodulin	1	1	1
PF03256	Anaphase-promoting complex, subunit 10 (APC10)	1	1	1
PF03265	Deoxyribonuclease II	1	1	1
PF03266	NTPase	1	1	1
PF03271	EB1-like C-terminal motif	1	1	1
PF03283	Pectinacetylesterase	1	1	1
PF03291	mRNA capping enzyme	1	1	1
PF03297	S25 ribosomal protein	1	1	1
PF03299	Transcription factor AP-2	1	1	1
PF03301	Tryptophan 2,3-dioxygenase	1	1	1
PF03332	Eukaryotic phosphomannomutase	1	1	1
PF03343	SART-1 family	1	1	1
PF03344	Daxx N-terminal Rassf1C-interacting domain	1	1	1
PF03345	Oligosaccharyltransferase 48 kDa subunit beta	1	1	1
PF03348	Serine incorporator (Serinc)	1	1	1
PF03364	Polyketide cyclase / dehydrase and lipid transport	1	1	1
PF03367	ZPR1 zinc-finger domain	1	1	1
PF03378	CAS/CSE protein, C-terminus	1	1	1
PF03381	LEM3 (ligand-effect modulator 3) family / CDC50 family	1	1	1
PF03398	Regulator of Vps4 activity in the MVB pathway	1	1	1
PF03404	Mo-co oxidoreductase dimerisation domain	1	1	1
PF03417	Acyl-coenzyme A:6-aminopenicillanic acid acyl-transferase	1	1	1
PF03437	BtpA family	1	1	1
PF03439	Early transcription elongation factor of RNA pol II, NGN section	1	1	1
PF03441	FAD binding domain of DNA photolyase	1	1	1
PF03453	MoeA N-terminal region (domain I and II)	1	1	1
PF03454	MoeA C-terminal region (domain IV)	1	1	1
PF03462	PCRF domain	1	1	1
PF03467	Smg-4/UPF3 family	1	1	1
PF03477	ATP cone domain	1	1	1
PF03484	tRNA synthetase B5 domain	1	1	1
PF03485	Arginyl tRNA synthetase N terminal domain	1	1	1
PF03489	Saposin-like type B, region 2	1	1	1
PF03501	Plectin/S10 domain	1	1	1
[truncated: 2,027 more rows]

## Sheet: Total
pfam ID	pfam description	Apis cerana	Apis mellifera	Apis cerana/Apis mellifera
PF00001	7 transmembrane receptor (rhodopsin family)	55	62	0.887097
PF00002	7 transmembrane receptor (Secretin family)	11	14	0.785714
PF00003	7 transmembrane sweet-taste receptor of 3 GCPR	9	11	0.818182
PF00004	ATPase family associated with various cellular activities (AAA)	37	38	0.973684
PF00005	ABC transporter	39	39	1
PF00006	ATP synthase alpha/beta family, nucleotide-binding domain	4	4	1
PF00008	EGF-like domain	17	16	1.0625
PF00009	Elongation factor Tu GTP binding domain	16	16	1
PF00010	Helix-loop-helix DNA-binding domain	39	45	0.866667
PF00011	Hsp20/alpha crystallin family	10	9	1.11111
PF00012	Hsp70 protein	6	6	1
PF00013	KH domain	18	17	1.05882
PF00014	Kunitz/Bovine pancreatic trypsin inhibitor domain	4	4	1
PF00017	SH2 domain	26	27	0.962963
PF00018	SH3 domain	31	32	0.96875
PF00019	Transforming growth factor beta like domain	8	8	1
PF00020	TNFR/NGFR cysteine-rich region	1	1	1
PF00022	Actin	15	14	1.07143
PF00023	Ankyrin repeat	2	2	1
PF00024	PAN domain	7	6	1.16667
PF00025	ADP-ribosylation factor family	14	16	0.875
PF00026	Eukaryotic aspartyl protease	1	1	1
PF00027	Cyclic nucleotide-binding domain	15	16	0.9375
PF00028	Cadherin domain	18	14	1.28571
PF00031	Cystatin domain	1	1	1
PF00032	Cytochrome b(C-terminal)/b6/petD	0	1	0
PF00033	Cytochrome b/b6/petB	0	1	0
PF00034	Cytochrome c	1	2	0.5
PF00035	Double-stranded RNA binding motif	9	8	1.125
PF00036	EF hand	3	5	0.6
PF00037	4Fe-4S binding domain	1	1	1
PF00038	Intermediate filament protein	1	1	1
PF00041	Fibronectin type III domain	34	35	0.971429
PF00042	Globin	2	2	1
PF00043	Glutathione S-transferase, C-terminal domain	4	4	1
PF00044	Glyceraldehyde 3-phosphate dehydrogenase, NAD binding domain	2	2	1
PF00045	Hemopexin	2	1	2
PF00046	Homeobox domain	69	86	0.802326
PF00047	Immunoglobulin domain	9	9	1
PF00049	Insulin/IGF/Relaxin family	0	1	0
PF00050	Kazal-type serine protease inhibitor domain	3	1	3
PF00051	Kringle domain	4	4	1
PF00052	Laminin B (Domain IV)	4	4	1
PF00053	Laminin EGF domain	9	9	1
PF00054	Laminin G domain	9	9	1
PF00055	Laminin N-terminal (Domain VI)	6	5	1.2
PF00056	lactate/malate dehydrogenase, NAD binding domain	6	7	0.857143
PF00057	Low-density lipoprotein receptor domain class A	26	25	1.04
PF00058	Low-density lipoprotein receptor repeat class B	6	6	1
PF00059	Lectin C-type domain	9	9	1
PF00060	Ligand-gated ion channel	16	20	0.8
PF00061	Lipocalin / cytosolic fatty-acid binding protein family	4	3	1.33333
PF00062	C-type lysozyme/alpha-lactalbumin family	2	2	1
PF00063	Myosin head (motor domain)	19	16	1.1875
PF00066	LNR domain	2	2	1
PF00067	Cytochrome P450	45	47	0.957447
PF00068	Phospholipase A2	1	1	1
PF00069	Protein kinase domain	152	155	0.980645
PF00071	Ras family	58	64	0.90625
PF00075	RNase H	1	1	1
PF00076	RNA recognition motif. (a.k.a. RRM, RBD, or RNP domain)	94	99	0.949495
PF00078	Reverse transcriptase (RNA-dependent DNA polymerase)	8	2	4
PF00079	Serpin (serine protease inhibitor)	6	7	0.857143
PF00080	Copper/zinc superoxide dismutase (SODC)	4	4	1
PF00081	Iron/manganese superoxide dismutases, alpha-hairpin domain	1	1	1
PF00082	Subtilase family	7	5	1.4
PF00083	Sugar (and other) transporter	40	48	0.833333
PF00084	Sushi repeat (SCR repeat)	7	7	1
PF00085	Thioredoxin	21	22	0.954545
PF00086	Thyroglobulin type-1 repeat	3	3	1
PF00088	Trefoil (P-type) domain	1	1	1
PF00089	Trypsin	51	57	0.894737
PF00090	Thrombospondin type 1 domain	16	20	0.8
PF00091	Tubulin/FtsZ family, GTPase domain	14	15	0.933333
PF00092	von Willebrand factor type A domain	2	3	0.666667
PF00093	von Willebrand factor type C domain	4	4	1
PF00094	von Willebrand factor type D domain	6	6	1
PF00095	WAP-type (Whey Acidic Protein) 'four-disulfide core'	5	5	1
PF00096	Zinc finger, C2H2 type	29	33	0.878788
PF00097	Zinc finger, C3HC4 type (RING finger)	3	4	0.75
PF00098	Zinc knuckle	1	2	0.5
PF00100	Zona pellucida-like domain	8	9	0.888889
PF00102	Protein-tyrosine phosphatase	13	14	0.928571
PF00104	Ligand-binding domain of nuclear hormone receptor	19	19	1
PF00105	Zinc finger, C4 type (two domains)	20	22	0.909091
PF00106	short chain dehydrogenase	34	35	0.971429
PF00107	Zinc-binding dehydrogenase	6	6	1
PF00108	Thiolase, N-terminal domain	5	5	1
PF00109	Beta-ketoacyl synthase, N-terminal domain	3	3	1
PF00110	wnt family	6	7	0.857143
PF00111	2Fe-2S iron-sulfur cluster binding domain	2	3	0.666667
PF00112	Papain family cysteine protease	7	6	1.16667
PF00113	Enolase, C-terminal TIM barrel domain	2	2	1
PF00115	Cytochrome C and Quinol oxidase polypeptide I	0	1	0
PF00116	Cytochrome C oxidase subunit II, periplasmic domain	0	1	0
PF00117	Glutamine amidotransferase class-I	3	3	1
PF00118	TCP-1/cpn60 chaperonin family	10	10	1
PF00119	ATP synthase A chain	0	1	0
PF00120	Glutamine synthetase, catalytic domain	1	1	1
PF00121	Triosephosphate isomerase	1	1	1
PF00122	E1-E2 ATPase	12	14	0.857143
PF00125	Core histone H2A/H2B/H3/H4	18	17	1.05882
PF00128	Alpha amylase, catalytic domain	8	8	1
PF00130	Phorbol esters/diacylglycerol binding domain (C1 domain)	19	21	0.904762
PF00132	Bacterial transferase hexapeptide (six repeats)	2	2	1
PF00133	tRNA synthetases class I (I, L, M and V)	6	6	1
PF00134	Cyclin, N-terminal domain	13	15	0.866667
PF00135	Carboxylesterase family	30	24	1.25
PF00136	DNA polymerase family B	4	4	1
PF00137	ATP synthase subunit C	3	3	1
PF00145	C-5 cytosine-specific DNA methylase	3	4	0.75
PF00146	NADH dehydrogenase	0	1	0
PF00147	Fibrinogen beta and gamma chains, C-terminal globular domain	1	2	0.5
PF00149	Calcineurin-like phosphoesterase	18	19	0.947368
PF00151	Lipase	15	16	0.9375
PF00152	tRNA synthetases class II (D, K and N)	5	5	1
PF00153	Mitochondrial carrier protein	31	33	0.939394
PF00155	Aminotransferase class I and II	12	12	1
PF00156	Phosphoribosyl transferase domain	3	3	1
PF00157	Pou domain - N-terminal to homeobox domain	4	4	1
PF00159	Pancreatic hormone peptide	1	1	1
PF00160	Cyclophilin type peptidyl-prolyl cis-trans isomerase/CLD	17	17	1
PF00162	Phosphoglycerate kinase	1	1	1
PF00163	Ribosomal protein S4/S9 N-terminal domain	1	1	1
PF00164	Ribosomal protein S12/S23	2	2	1
PF00166	Chaperonin 10 Kd subunit	1	1	1
PF00167	Fibroblast growth factor	3	3	1
PF00168	C2 domain	39	42	0.928571
PF00169	PH domain	42	44	0.954545
PF00170	bZIP transcription factor	9	9	1
PF00171	Aldehyde dehydrogenase family	9	9	1
PF00173	Cytochrome b5-like Heme/Steroid binding domain	8	12	0.666667
PF00174	Oxidoreductase molybdopterin binding domain	1	1	1
PF00175	Oxidoreductase NAD-binding domain	4	6	0.666667
PF00176	SNF2 family N-terminal domain	16	17	0.941176
PF00177	Ribosomal protein S7p/S5e	2	2	1
PF00178	Ets-domain	6	9	0.666667
PF00179	Ubiquitin-conjugating enzyme	26	26	1
PF00180	Isocitrate/isopropylmalate dehydrogenase	4	4	1
PF00181	Ribosomal Proteins L2, RNA binding domain	2	2	1
PF00183	Hsp90 protein	4	4	1
PF00185	Aspartate/ornithine carbamoyltransferase, Asp/Orn binding domain	1	1	1
PF00186	Dihydrofolate reductase	1	1	1
PF00188	Cysteine-rich secretory protein family	3	4	0.75
PF00189	Ribosomal protein S3, C-terminal domain	1	1	1
PF00191	Annexin	3	3	1
PF00194	Eukaryotic-type carbonic anhydrase	8	10	0.8
PF00198	2-oxoacid dehydrogenases acyltransferase (catalytic domain)	4	4	1
PF00199	Catalase	1	1	1
PF00200	Disintegrin	5	6	0.833333
PF00201	UDP-glucoronosyl and UDP-glucosyl transferase	9	12	0.75
PF00202	Aminotransferase class-III	7	6	1.16667
PF00203	Ribosomal protein S19	1	1	1
PF00204	DNA gyrase B	1	1	1
PF00205	Thiamine pyrophosphate enzyme, central domain	0	1	0
PF00206	Lyase	3	3	1
PF00207	Alpha-2-macroglobulin family	3	3	1
PF00208	Glutamate/Leucine/Phenylalanine/Valine dehydrogenase	1	1	1
PF00209	Sodium:neurotransmitter symporter family	15	14	1.07143
PF00210	Ferritin-like domain	3	3	1
PF00211	Adenylate and Guanylate cyclase catalytic domain	17	17	1
PF00213	ATP synthase delta (OSCP) subunit	1	1	1
PF00215	Orotidine 5'-phosphate decarboxylase / HUMPS family	1	1	1
PF00217	ATP:guanido phosphotransferase, C-terminal catalytic domain	3	2	1.5
PF00219	Insulin-like growth factor binding protein	0	1	0
PF00224	Pyruvate kinase, barrel domain	2	2	1
PF00225	Kinesin motor domain	25	25	1
PF00226	DnaJ domain	28	30	0.933333
PF00227	Proteasome subunit	14	15	0.933333
PF00230	Major intrinsic protein	6	5	1.2
PF00231	ATP synthase	1	1	1
PF00232	Glycosyl hydrolase family 1	1	1	1
PF00233	3'5'-cyclic nucleotide phosphodiesterase	6	7	0.857143
PF00235	Profilin	1	1	1
PF00237	Ribosomal protein L22p/L17e	2	2	1
PF00238	Ribosomal protein L14p/L23e	2	2	1
PF00240	Ubiquitin family	22	22	1
PF00241	Cofilin/tropomyosin-type actin-binding protein	3	3	1
PF00244	14-3-3 protein	2	2	1
PF00245	Alkaline phosphatase	3	3	1
PF00246	Zinc carboxypeptidase	9	10	0.9
PF00248	Aldo/keto reductase family	8	8	1
PF00249	Myb-like DNA-binding domain	11	11	1
PF00250	Forkhead domain	16	16	1
PF00252	Ribosomal protein L16p/L10e	2	1	2
PF00253	Ribosomal protein S14p/S29e	1	2	0.5
PF00254	FKBP-type peptidyl-prolyl cis-trans isomerase	6	7	0.857143
PF00255	Glutathione peroxidase	2	2	1
PF00258	Flavodoxin	3	3	1
PF00261	Tropomyosin	4	4	1
PF00262	Calreticulin family	2	2	1
PF00266	Aminotransferase class-V	5	5	1
PF00268	Ribonucleotide reductase, small chain	1	1	1
PF00270	DEAD/DEAH box helicase	56	56	1
PF00271	Helicase conserved C-terminal domain	73	77	0.948052
PF00274	Fructose-bisphosphate aldolase class-I	2	2	1
PF00276	Ribosomal protein L23	2	2	1
PF00278	Pyridoxal-dependent decarboxylase, C-terminal sheet domain	1	1	1
PF00281	Ribosomal protein L5	1	1	1
PF00282	Pyridoxal-dependent decarboxylase conserved domain	11	11	1
PF00285	Citrate synthase, C-terminal domain	3	3	1
PF00287	Sodium / potassium ATPase beta chain	3	3	1
PF00288	GHMP kinases N terminal domain	2	4	0.5
PF00289	Biotin carboxylase, N-terminal domain	3	3	1
PF00291	Pyridoxal-phosphate dependent enzyme	2	3	0.666667
PF00292	'Paired box' domain	6	9	0.666667
PF00293	NUDIX domain	7	10	0.7
PF00294	pfkB family carbohydrate kinase	3	5	0.6
PF00297	Ribosomal protein L3	2	2	1
PF00298	Ribosomal protein L11, RNA binding domain	2	2	1
PF00300	Histidine phosphatase superfamily (branch 1)	6	6	1
PF00303	Thymidylate synthase	0	1	0
PF00306	ATP synthase alpha/beta chain, C terminal domain	1	1	1
PF00307	Calponin homology (CH) domain	23	25	0.92
PF00310	Glutamine amidotransferases class-II	1	1	1
PF00312	Ribosomal protein S15	2	2	1
PF00313	'Cold-shock' DNA-binding domain	2	2	1
PF00316	Fructose-1-6-bisphosphatase, N-terminal domain	1	1	1
PF00317	Ribonucleotide reductase, all-alpha domain	1	1	1
PF00318	Ribosomal protein S2	2	2	1
PF00319	SRF-type transcription factor (DNA-binding and dimerisation domain)	2	2	1
PF00320	GATA zinc finger	6	6	1
PF00324	Amino acid permease	5	5	1
PF00326	Prolyl oligopeptidase family	7	7	1
PF00327	Ribosomal protein L30p/L7e	2	2	1
PF00328	Histidine phosphatase superfamily (branch 2)	11	15	0.733333
PF00329	Respiratory-chain NADH dehydrogenase, 30 Kd subunit	1	1	1
PF00330	Aconitase family (aconitate hydratase)	2	2	1
PF00333	Ribosomal protein S5, N-terminal domain	2	2	1
PF00334	Nucleoside diphosphate kinase	4	4	1
PF00335	Tetraspanin family	18	21	0.857143
PF00337	Galactoside-binding lectin	3	3	1
PF00338	Ribosomal protein S10p/S20e	2	3	0.666667
PF00339	Arrestin (or S-antigen), N-terminal domain	6	8	0.75
PF00341	PDGF/VEGF domain	3	4	0.75
PF00342	Phosphoglucose isomerase	1	1	1
PF00343	Carbohydrate phosphorylase	1	1	1
PF00344	SecY translocase	1	1	1
PF00346	Respiratory-chain NADH dehydrogenase, 49 Kd subunit	1	1	1
PF00347	Ribosomal protein L6	1	1	1
PF00348	Polyprenyl synthetase	8	10	0.8
PF00349	Hexokinase	2	2	1
PF00350	Dynamin family	6	5	1.2
PF00351	Biopterin-dependent aromatic amino acid hydroxylase	2	3	0.666667
PF00352	Transcription factor TFIID (or TATA-binding protein, TBP)	2	3	0.666667
PF00354	Pentaxin family	2	3	0.666667
PF00355	Rieske [2Fe-2S] domain	5	4	1.25
PF00361	Proton-conducting membrane transporter	0	3	0
PF00362	Integrin beta chain VWA domain	3	3	1
PF00364	Biotin-requiring enzyme	8	8	1
PF00365	Phosphofructokinase	1	1	1
PF00366	Ribosomal protein S17	2	2	1
PF00368	Hydroxymethylglutaryl-coenzyme A reductase	1	1	1
PF00370	FGGY family of carbohydrate kinases, N-terminal domain	6	6	1
PF00372	Hemocyanin, copper containing domain	5	5	1
PF00373	FERM central domain	18	20	0.9
PF00375	Sodium:dicarboxylate symporter family	5	5	1
PF00378	Enoyl-CoA hydratase/isomerase	9	9	1
PF00379	Insect cuticle protein	29	37	0.783784
PF00380	Ribosomal protein S9/S16	2	3	0.666667
PF00382	Transcription factor TFIIB repeat	3	2	1.5
PF00383	Cytidine and deoxycytidylate deaminase zinc-binding region	2	2	1
PF00384	Molybdopterin oxidoreductase	1	1	1
PF00385	Chromo (CHRromatin Organisation MOdifier) domain	7	8	0.875
PF00386	C1q domain	0	1	0
PF00387	Phosphatidylinositol-specific phospholipase C, Y domain	6	5	1.2
PF00388	Phosphatidylinositol-specific phospholipase C, X domain	5	5	1
PF00389	D-isomer specific 2-hydroxyacid dehydrogenase, catalytic domain	4	4	1
PF00390	Malic enzyme, N-terminal domain	2	2	1
PF00393	6-phosphogluconate dehydrogenase, C-terminal domain	1	1	1
PF00394	Multicopper oxidase	5	4	1.25
PF00397	WW domain	19	21	0.904762
PF00398	Ribosomal RNA adenine dimethylase	1	3	0.333333
PF00400	WD domain, G-beta repeat	48	54	0.888889
PF00402	Calponin family repeat	4	4	1
PF00403	Heavy-metal-associated domain	3	3	1
PF00405	Transferrin	3	3	1
PF00406	Adenylate kinase	7	8	0.875
PF00408	Phosphoglucomutase/phosphomannomutase, C-terminal domain	3	3	1
PF00410	Ribosomal protein S8	1	1	1
PF00411	Ribosomal protein S11	2	2	1
PF00412	LIM domain	22	29	0.758621
PF00413	Matrixin	2	1	2
PF00415	Regulator of chromosome condensation (RCC1) repeat	13	13	1
PF00416	Ribosomal protein S13/S18	1	1	1
PF00418	Tau and MAP protein, tubulin-binding repeat	1	1	1
PF00428	60s Acidic ribosomal protein	3	3	1
PF00431	CUB domain	13	14	0.928571
PF00432	Prenyltransferase and squalene oxidase repeat	2	3	0.666667
PF00433	Protein kinase C terminal domain	10	10	1
PF00435	Spectrin repeat	12	8	1.5
PF00436	Single-strand binding protein family	1	1	1
PF00438	S-adenosylmethionine synthetase, N-terminal domain	1	1	1
PF00439	Bromodomain	19	20	0.95
PF00441	Acyl-CoA dehydrogenase, C-terminal domain	6	7	0.857143
PF00443	Ubiquitin carboxyl-terminal hydrolase	23	24	0.958333
PF00444	Ribosomal protein L36	0	1	0
PF00445	Ribonuclease T2 family	1	0	#DIV/0!
PF00447	HSF-type DNA-binding	0	2	0
PF00448	SRP54-type protein, GTPase domain	2	2	1
PF00450	Serine carboxypeptidase	2	2	1
PF00452	Apoptosis regulator proteins, Bcl-2 family	2	1	2
PF00453	Ribosomal protein L20	1	1	1
PF00454	Phosphatidylinositol 3- and 4-kinase	11	12	0.916667
PF00456	Transketolase, thiamine diphosphate binding domain	1	1	1
PF00458	WHEP-TRS domain	3	4	0.75
PF00459	Inositol monophosphatase family	6	7	0.857143
PF00462	Glutaredoxin	3	5	0.6
PF00464	Serine hydroxymethyltransferase	1	1	1
PF00465	Iron-containing alcohol dehydrogenase	1	2	0.5
PF00466	Ribosomal protein L10	2	2	1
PF00467	KOW motif	2	3	0.666667
PF00468	Ribosomal protein L34	1	1	1
PF00472	RF-1 domain	2	3	0.666667
PF00473	Corticotropin-releasing factor family	1	1	1
PF00474	Sodium:solute symporter family	10	11	0.909091
PF00476	DNA polymerase family A	2	2	1
PF00478	IMP dehydrogenase / GMP reductase domain	2	2	1
PF00479	Glucose-6-phosphate dehydrogenase, NAD binding domain	1	1	1
PF00481	Protein phosphatase 2C	9	10	0.9
PF00483	Nucleotidyl transferase	3	3	1
PF00484	Carbonic anhydrase	1	1	1
PF00485	Phosphoribulokinase / Uridine kinase family	2	1	2
PF00487	Fatty acid desaturase	5	11	0.454545
PF00488	MutS domain V	2	4	0.5
PF00490	Delta-aminolevulinic acid dehydratase	1	1	1
PF00491	Arginase family	1	1	1
PF00493	MCM2/3/5 family	8	8	1
PF00494	Squalene/phytoene synthase	1	1	1
PF00497	Bacterial extracellular solute-binding proteins, family 3	2	1	2
PF00498	FHA domain	13	13	1
PF00501	AMP-binding enzyme	16	16	1
PF00503	G-protein alpha subunit	6	5	1.2
PF00505	HMG (high mobility group) box	23	27	0.851852
PF00507	NADH-ubiquinone/plastoquinone oxidoreductase, chain 3	0	1	0
PF00510	Cytochrome c oxidase subunit III	0	1	0
PF00514	Armadillo/beta-catenin-like repeat	7	7	1
PF00515	Tetratricopeptide repeat	10	12	0.833333
PF00520	Ion transport protein	33	34	0.970588
PF00521	DNA gyrase/topoisomerase IV, subunit A	1	1	1
PF00530	Scavenger receptor cysteine-rich domain	4	4	1
PF00531	Death domain	7	10	0.7
PF00533	BRCA1 C Terminus (BRCT) domain	3	7	0.428571
PF00534	Glycosyl transferases group 1	4	4	1
PF00535	Glycosyl transferase family 2	9	9	1
PF00536	SAM domain (Sterile alpha motif)	16	18	0.888889
PF00538	linker histone H1 and H5 family	3	6	0.5
PF00542	Ribosomal protein L7/L12 C-terminal domain	1	1	1
PF00549	CoA-ligase	4	4	1
PF00550	Phosphopantetheine attachment site	3	2	1.5
PF00551	Formyl transferase	3	3	1
PF00554	Rel homology DNA-binding domain	3	4	0.75
PF00557	Metallopeptidase family M24	9	9	1
PF00561	alpha/beta hydrolase fold	11	12	0.916667
PF00562	RNA polymerase Rpb2, domain 6	3	3	1
PF00564	PB1 domain	3	3	1
PF00565	Staphylococcal nuclease homologue	1	1	1
PF00566	Rab-GTPase-TBC domain	21	21	1
PF00567	Tudor domain	8	9	0.888889
PF00568	WH1 domain	4	4	1
PF00569	Zinc finger, ZZ type	10	10	1
PF00570	HRDC domain	2	2	1
PF00571	CBS domain	4	4	1
PF00572	Ribosomal protein L13	2	2	1
PF00573	Ribosomal protein L4/L1 family	2	2	1
PF00574	Clp protease	1	1	1
PF00575	S1 RNA binding domain	6	7	0.857143
PF00576	HIUase/Transthyretin family	1	1	1
PF00578	AhpC/TSA family	5	4	1.25
PF00579	tRNA synthetases class I (W and Y)	4	4	1
PF00581	Rhodanese-like domain	5	5	1
PF00583	Acetyltransferase (GNAT) family	13	14	0.928571
PF00584	SecE/Sec61-gamma subunits of protein translocation complex	1	1	1
PF00586	AIR synthase related protein, N-terminal domain	2	2	1
PF00587	tRNA synthetase class II core domain (G, H, P, S and T)	7	6	1.16667
PF00588	SpoU rRNA Methylase family	2	2	1
PF00590	Tetrapyrrole (Corrin/Porphyrin) Methylases	1	1	1
PF00595	PDZ domain (Also known as DHR or GLGF)	56	56	1
PF00596	Class II Aldolase and Adducin N-terminal domain	2	2	1
PF00609	Diacylglycerol kinase accessory domain	5	5	1
PF00610	Domain found in Dishevelled, Egl-10, and Pleckstrin (DEP)	5	5	1
PF00611	Fes/CIP4, and EFC/F-BAR homology domain	6	6	1
PF00612	IQ calmodulin-binding motif	1	2	0.5
PF00613	Phosphoinositide 3-kinase family, accessory domain (PIK domain)	4	4	1
PF00614	Phospholipase D Active site motif	2	2	1
PF00615	Regulator of G protein signaling domain	11	11	1
PF00616	GTPase-activator protein for Ras-like GTPase	6	6	1
PF00617	RasGEF domain	9	8	1.125
PF00618	RasGEF N-terminal motif	6	6	1
PF00619	Caspase recruitment domain	0	1	0
PF00620	RhoGAP domain	20	24	0.833333
PF00621	RhoGEF domain	24	27	0.888889
PF00622	SPRY domain	12	10	1.2
PF00623	RNA polymerase Rpb1, domain 2	3	3	1
PF00625	Guanylate kinase	9	9	1
PF00626	Gelsolin repeat	6	6	1
PF00627	UBA/TS-N domain	7	8	0.875
PF00628	PHD-finger	24	23	1.04348
PF00629	MAM domain, meprin/A5/mu	3	3	1
PF00630	Filamin/ABP280 repeat	4	5	0.8
PF00631	GGL domain	3	4	0.75
PF00632	HECT-domain (ubiquitin-transferase)	14	14	1
PF00633	Helix-hairpin-helix motif	1	1	1
PF00634	BRCA2 repeat	0	1	0
PF00635	MSP (Major sperm protein) domain	3	3	1
PF00636	Ribonuclease III domain	4	3	1.33333
PF00637	Region in Clathrin and VPS	4	4	1
PF00638	RanBP1 domain	4	4	1
PF00639	PPIC-type PPIASE domain	1	1	1
PF00640	Phosphotyrosine interaction domain (PTB/PID)	10	12	0.833333
PF00641	Zn-finger in Ran binding protein and others	6	6	1
PF00642	Zinc finger C-x8-C-x5-C-x3-H type (and similar)	8	8	1
PF00643	B-box zinc finger	7	7	1
PF00644	Poly(ADP-ribose) polymerase catalytic domain	3	3	1
PF00645	Poly(ADP-ribose) polymerase and DNA-Ligase Zn-finger region	2	2	1
PF00646	F-box domain	2	3	0.666667
PF00647	Elongation factor 1 gamma, conserved domain	1	1	1
PF00648	Calpain family cysteine protease	5	4	1.25
PF00650	CRAL/TRIO domain	15	15	1
PF00651	BTB/POZ domain	55	63	0.873016
PF00652	Ricin-type beta-trefoil lectin domain	7	7	1
PF00653	Inhibitor of Apoptosis domain	3	5	0.6
PF00654	Voltage gated chloride channel	3	3	1
PF00656	Caspase domain	5	6	0.833333
PF00657	GDSL-like Lipase/Acylhydrolase	5	6	0.833333
PF00658	Poly-adenylate binding protein, unique domain	2	2	1
PF00659	POLO box duplicated region	1	2	0.5
PF00664	ABC transporter transmembrane region	11	14	0.785714
PF00665	Integrase core domain	1	0	#DIV/0!
PF00667	FAD binding domain	2	3	0.666667
PF00670	S-adenosyl-L-homocysteine hydrolase, NAD binding domain	2	2	1
PF00673	ribosomal L5P family C-terminus	1	1	1
PF00675	Insulinase (Peptidase family M16)	5	6	0.833333
PF00676	Dehydrogenase E1 component	6	6	1
PF00679	Elongation factor G C-terminus	6	6	1
PF00682	HMGL-like	1	2	0.5
PF00683	TB domain	2	1	2
PF00684	DnaJ central domain	2	2	1
PF00685	Sulfotransferase domain	8	7	1.14286
PF00686	Starch binding domain	1	1	1
PF00687	Ribosomal protein L1p/L10e family	3	3	1
PF00688	TGF-beta propeptide	7	7	1
PF00689	Cation transporting ATPase, C-terminus	7	6	1.16667
PF00690	Cation transporter/ATPase, N-terminus	7	7	1
PF00692	dUTPase	1	1	1
PF00694	Aconitase C-terminal domain	2	2	1
PF00696	Amino acid kinase family	1	1	1
PF00698	Acyl transferase domain	3	3	1
PF00701	Dihydrodipicolinate synthetase family	0	1	0
PF00702	haloacid dehalogenase-like hydrolase	12	12	1
PF00703	Glycosyl hydrolases family 2	1	0	#DIV/0!
PF00704	Glycosyl hydrolases family 18	12	11	1.09091
PF00705	Proliferating cell nuclear antigen, N-terminal domain	1	1	1
PF00708	Acylphosphatase	2	2	1
PF00709	Adenylosuccinate synthetase	1	1	1
PF00710	Asparaginase, N-terminal	1	1	1
PF00717	Peptidase S24-like	2	2	1
PF00719	Inorganic pyrophosphatase	1	1	1
PF00722	Glycosyl hydrolases family 16	1	1	1
PF00723	Glycosyl hydrolases family 15	2	2	1
PF00725	3-hydroxyacyl-CoA dehydrogenase, C-terminal domain	2	2	1
PF00728	Glycosyl hydrolase family 20, catalytic domain	5	5	1
PF00730	HhH-GPD superfamily base excision DNA repair protein	2	2	1
PF00731	AIR carboxylase	1	1	1
PF00732	GMC oxidoreductase	20	21	0.952381
PF00733	Asparagine synthase	1	2	0.5
PF00735	Septin	4	4	1
PF00736	EF-1 guanine nucleotide exchange domain	2	2	1
PF00743	Flavin-binding monooxygenase-like	3	3	1
PF00749	tRNA synthetases class I (E and Q), catalytic domain	3	3	1
PF00750	tRNA synthetases class I (R)	2	2	1
PF00751	DM DNA binding domain	2	4	0.5
PF00752	XPG N-terminal domain	4	4	1
PF00753	Metallo-beta-lactamase superfamily	3	4	0.75
PF00754	F5/8 type C domain	7	10	0.7
PF00755	Choline/Carnitine o-acyltransferase	3	3	1
PF00756	Putative esterase	1	1	1
PF00757	Furin-like cysteine rich region	2	3	0.666667
PF00759	Glycosyl hydrolase family 9	1	1	1
PF00762	Ferrochelatase	1	1	1
PF00763	Tetrahydrofolate dehydrogenase/cyclohydrolase, catalytic domain	2	2	1
PF00764	Arginosuccinate synthase	1	1	1
PF00766	Electron transfer flavoprotein FAD-binding domain	1	1	1
PF00769	Ezrin/radixin/moesin family	2	2	1
PF00773	RNB domain	1	2	0.5
PF00778	DIX domain	2	2	1
PF00779	BTK motif	1	2	0.5
PF00780	CNH domain	6	6	1
PF00781	Diacylglycerol kinase catalytic domain	8	8	1
PF00782	Dual specificity phosphatase, catalytic domain	11	16	0.6875
PF00784	MyTH4 domain	6	5	1.2
PF00786	P21-Rho-binding domain	4	4	1
PF00787	PX domain	20	21	0.952381
PF00788	Ras association (RalGDS/AF-6) domain	12	12	1
PF00789	UBX domain	6	7	0.857143
PF00790	VHS domain	4	4	1
PF00791	ZU5 domain	4	4	1
PF00792	Phosphoinositide 3-kinase C2	3	3	1
PF00794	PI3-kinase family, ras-binding domain	2	2	1
PF00795	Carbon-nitrogen hydrolase	8	7	1.14286
PF00804	Syntaxin	2	2	1
PF00805	Pentapeptide repeats (8 copies)	1	1	1
PF00806	Pumilio-family RNA binding repeat	1	1	1
PF00807	Apidaecin	0	1	0
PF00808	Histone-like transcription factor (CBF/NF-Y) and archaeal histone	5	7	0.714286
PF00810	ER lumen protein retaining receptor	1	1	1
PF00812	Ephrin	1	1	1
PF00814	Glycoprotease family	2	2	1
PF00817	impB/mucB/samB family	3	3	1
PF00821	Phosphoenolpyruvate carboxykinase C-terminal P-loop domain	1	1	1
PF00822	PMP-22/EMP/MP20/Claudin family	1	1	1
PF00827	Ribosomal L15	1	1	1
PF00828	Ribosomal proteins 50S-L15, 50S-L18e, 60S-L27A	2	2	1
PF00829	Ribosomal prokaryotic L21 protein	1	1	1
PF00831	Ribosomal L29 protein	1	1	1
PF00832	Ribosomal L39 protein	0	1	0
PF00833	Ribosomal S17	1	1	1
PF00834	Ribulose-phosphate 3 epimerase family	1	1	1
PF00835	SNAP-25 family	1	1	1
PF00836	Stathmin family	1	1	1
PF00838	Translationally controlled tumour protein	1	1	1
PF00839	Cysteine rich repeat	1	1	1
PF00849	RNA pseudouridylate synthase	2	3	0.666667
PF00850	Histone deacetylase domain	4	4	1
PF00852	Glycosyltransferase family 10 (fucosyltransferase) C-term	3	4	0.75
PF00853	Runt domain	3	4	0.75
PF00854	POT family	1	1	1
PF00855	PWWP domain	10	11	0.909091
PF00856	SET domain	19	25	0.76
PF00857	Isochorismatase family	3	3	1
PF00858	Amiloride-sensitive sodium channel	6	8	0.75
PF00860	Permease family	1	1	1
PF00867	XPG I-region	4	4	1
PF00868	Transglutaminase family	2	2	1
PF00870	P53 DNA-binding domain	1	1	1
PF00875	DNA photolyase	2	2	1
PF00876	Innexin	4	6	0.666667
PF00878	Cation-independent mannose-6-phosphate receptor repeat	1	1	1
PF00880	Nebulin repeat	1	0	#DIV/0!
PF00881	Nitroreductase family	1	1	1
PF00883	Cytosol aminopeptidase family, catalytic domain	2	2	1
PF00884	Sulfatase	8	9	0.888889
PF00886	Ribosomal protein S16	1	1	1
PF00887	Acyl CoA binding protein	4	4	1
PF00888	Cullin family	6	6	1
PF00889	Elongation factor TS	1	1	1
PF00890	FAD binding domain	2	2	1
PF00892	EamA-like transporter family	2	3	0.666667
PF00899	ThiF family	8	8	1
PF00900	Ribosomal family S4e	1	1	1
PF00903	Glyoxalase/Bleomycin resistance protein/Dioxygenase superfamily	2	2	1
PF00907	T-box	7	6	1.16667
PF00909	Ammonium Transporter Family	3	3	1
PF00916	Sulfate permease family	8	9	0.888889
PF00917	MATH domain	2	2	1
PF00919	Uncharacterized protein family UPF0004	1	2	0.5
PF00923	Transaldolase/Fructose-6-phosphate aldolase	1	1	1
PF00927	Transglutaminase family, C-terminal ig like domain	2	2	1
PF00928	Adaptor complexes medium subunit family	5	5	1
PF00929	Exonuclease	5	7	0.714286
PF00930	Dipeptidyl peptidase IV (DPP IV) N-terminal region	5	5	1
PF00931	NB-ARC domain	0	1	0
PF00932	Lamin Tail Domain	1	1	1
PF00935	Ribosomal protein L44	1	1	1
PF00939	Sodium:sulfate symporter transmembrane region	2	2	1
PF00940	DNA-dependent RNA polymerase	1	1	1
PF00941	FAD binding domain in molybdopterin dehydrogenase	2	2	1
PF00953	Glycosyl transferase family 4	1	1	1
PF00955	HCO3- transporter family	2	2	1
PF00956	Nucleosome assembly protein (NAP)	1	2	0.5
PF00957	Synaptobrevin	7	8	0.875
PF00958	GMP synthase C terminal domain	1	1	1
PF00962	Adenosine/AMP deaminase	3	3	1
PF00965	Tissue inhibitor of metalloproteinase	0	1	0
PF00970	Oxidoreductase FAD-binding domain	2	3	0.666667
PF00975	Thioesterase domain	2	2	1
PF00982	Glycosyltransferase family 20	1	1	1
PF00984	UDP-glucose/GDP-mannose dehydrogenase family, central domain	1	1	1
PF00988	Carbamoyl-phosphate synthase small chain, CPSase domain	1	1	1
PF00989	PAS fold	5	8	0.625
PF00992	Troponin	2	2	1
PF00994	Probable molybdopterin binding domain	3	3	1
PF00995	Sec1 family	6	6	1
PF00996	GDP dissociation inhibitor	2	2	1
PF00999	Sodium/hydrogen exchanger family	5	4	1.25
PF01000	RNA polymerase Rpb3/RpoA insert domain	2	2	1
PF01007	Inward rectifier potassium channel	2	2	1
PF01008	Initiation factor 2 subunit family	4	4	1
PF01012	Electron transfer flavoprotein domain	2	2	1
PF01015	Ribosomal S3Ae family	1	1	1
PF01016	Ribosomal L27 protein	1	1	1
PF01017	STAT protein, all-alpha domain	1	1	1
PF01018	GTP1/OBG	2	2	1
PF01019	Gamma-glutamyltranspeptidase	3	3	1
PF01020	Ribosomal L40e family	1	1	1
PF01025	GrpE	1	1	1
PF01026	TatD related DNase	2	2	1
PF01027	Inhibitor of apoptosis-promoting Bax1	4	4	1
PF01028	Eukaryotic DNA topoisomerase I, catalytic core	1	1	1
PF01030	Receptor L domain	4	3	1.33333
PF01031	Dynamin central region	2	2	1
PF01033	Somatomedin B domain	1	1	1
PF01034	Syndecan domain	2	1	2
PF01035	6-O-methylguanine DNA methyltransferase, DNA binding domain	1	1	1
PF01039	Carboxyl transferase domain	2	2	1
PF01040	UbiA prenyltransferase family	2	3	0.666667
PF01042	Endoribonuclease L-PSP	2	2	1
PF01044	Vinculin family	6	3	2
PF01048	Phosphorylase superfamily	4	4	1
PF01049	Cadherin cytoplasmic region	2	2	1
PF01053	Cys/Met metabolism PLP-dependent enzyme	1	1	1
PF01055	Glycosyl hydrolases family 31	3	3	1
PF01058	NADH ubiquinone oxidoreductase, 20 Kd subunit	1	1	1
PF01061	ABC-2 type transporter	15	13	1.15385
PF01062	Bestrophin, RFP-TM, chloride channel	3	3	1
PF01063	Amino-transferase class IV	1	1	1
PF01064	Activin types I and II receptor domain	3	4	0.75
PF01066	CDP-alcohol phosphatidyltransferase	4	4	1
PF01067	Calpain large subunit, domain III	3	3	1
PF01068	ATP dependent DNA ligase domain	3	3	1
PF01070	FMN-dependent dehydrogenase	2	1	2
PF01071	Phosphoribosylglycinamide synthetase, ATP-grasp (A) domain	1	1	1
PF01074	Glycosyl hydrolases family 38 N-terminal domain	2	3	0.666667
PF01079	Hint module	1	1	1
PF01080	Presenilin	1	1	1
PF01082	Copper type II ascorbate-dependent monooxygenase, N-terminal domain	4	4	1
PF01084	Ribosomal protein S18	3	3	1
PF01085	Hedgehog amino-terminal signalling domain	2	1	2
PF01086	Clathrin light chain	1	1	1
PF01087	Galactose-1-phosphate uridyl transferase, N-terminal domain	1	3	0.333333
PF01088	Ubiquitin carboxyl-terminal hydrolase, family 1	3	3	1
PF01090	Ribosomal protein S19e	1	1	1
PF01091	PTN/MK heparin-binding protein family, C-terminal domain	1	1	1
PF01092	Ribosomal protein S6e	1	1	1
PF01094	Receptor family ligand binding region	23	22	1.04545
PF01096	Transcription factor S-II (TFIIS)	4	4	1
PF01097	Arthropod defensin	1	2	0.5
PF01103	Surface antigen	1	1	1
PF01105	emp24/gp25L/p24 family/GOLD	5	5	1
PF01106	NifU-like domain	1	1	1
PF01111	Cyclin-dependent kinase regulatory subunit	1	2	0.5
PF01112	Asparaginase	4	4	1
PF01115	F-actin capping protein, beta subunit	1	1	1
PF01119	DNA mismatch repair protein, C-terminal domain	2	3	0.666667
PF01120	Alpha-L-fucosidase	1	1	1
PF01121	Dephospho-CoA kinase	2	2	1
PF01122	Eukaryotic cobalamin-binding protein	1	1	1
PF01124	MAPEG family	1	1	1
PF01125	G10 protein	1	1	1
PF01126	Heme oxygenase	1	1	1
PF01127	Succinate dehydrogenase/Fumarate reductase transmembrane subunit	1	1	1
PF01130	CD36 family	10	9	1.11111
PF01131	DNA topoisomerase	2	2	1
PF01133	Enhancer of rudimentary	1	1	1
PF01134	Glucose inhibited division protein A	1	1	1
PF01135	Protein-L-isoaspartate(D-aspartate) O-methyltransferase (PCMT)	3	3	1
PF01137	RNA 3'-terminal phosphate cyclase	2	2	1
PF01138	3' exoribonuclease family, domain 1	7	7	1
PF01139	tRNA-splicing ligase RtcB	1	1	1
PF01142	tRNA pseudouridine synthase D (TruD)	1	1	1
PF01144	Coenzyme A transferase	1	1	1
PF01145	SPFH domain / Band 7 family	6	8	0.75
PF01146	Caveolin	1	1	1
PF01147	Crustacean CHH/MIH/GIH neurohormone family	0	1	0
PF01148	Cytidylyltransferase family	1	1	1
PF01150	GDA1/CD39 (nucleoside phosphatase) family	1	2	0.5
PF01151	GNS1/SUR4 family	13	15	0.866667
PF01153	Glypican	4	2	2
PF01154	Hydroxymethylglutaryl-coenzyme A synthase N terminal	1	1	1
PF01156	Inosine-uridine preferring nucleoside hydrolase	1	1	1
PF01157	Ribosomal protein L21e	1	1	1
PF01158	Ribosomal protein L36e	1	1	1
PF01159	Ribosomal protein L6e	1	1	1
PF01161	Phosphatidylethanolamine-binding protein	3	3	1
PF01163	RIO1 family	2	2	1
PF01165	Ribosomal protein S21	1	1	1
PF01166	TSC-22/dip/bun family	1	1	1
PF01167	Tub family	2	2	1
PF01168	Alanine racemase, N-terminal domain	1	1	1
PF01169	Uncharacterized protein family UPF0016	1	1	1
PF01170	Putative RNA methylase family UPF0020	2	2	1
PF01171	PP-loop family	2	2	1
PF01172	Shwachman-Bodian-Diamond syndrome (SBDS) protein	1	1	1
PF01176	Translation initiation factor 1A / IF-1	1	2	0.5
PF01180	Dihydroorotate dehydrogenase	2	2	1
PF01182	Glucosamine-6-phosphate isomerases/6-phosphogluconolactonase	2	2	1
PF01186	Lysyl oxidase	1	1	1
PF01189	16S rRNA methyltransferase RsmB/F	3	4	0.75
PF01191	RNA polymerase Rpb5, C-terminal domain	1	1	1
PF01192	RNA polymerase Rpb6	1	1	1
PF01193	RNA polymerase Rpb3/Rpb11 dimerisation domain	2	2	1
PF01194	RNA polymerases N / 8 kDa subunit	1	1	1
PF01196	Ribosomal protein L17	1	1	1
PF01198	Ribosomal protein L31e	1	1	1
PF01199	Ribosomal protein L34e	1	1	1
PF01200	Ribosomal protein S28e	1	2	0.5
PF01201	Ribosomal protein S8e	2	2	1
PF01204	Trehalase	2	2	1
PF01207	Dihydrouridine synthase (Dus)	4	4	1
PF01208	Uroporphyrinogen decarboxylase (URO-D)	1	1	1
PF01209	ubiE/COQ5 methyltransferase family	1	1	1
PF01210	NAD-dependent glycerol-3-phosphate dehydrogenase N-terminus	3	2	1.5
PF01212	Beta-eliminating lyase	1	2	0.5
PF01213	Adenylate cyclase associated (CAP) N terminal	1	1	1
PF01214	Casein kinase II regulatory subunit	1	1	1
PF01215	Cytochrome c oxidase subunit Vb	1	1	1
PF01217	Clathrin adaptor complex small chain	7	8	0.875
PF01218	Coproporphyrinogen III oxidase	1	1	1
PF01221	Dynein light chain type 1	3	2	1.5
PF01222	Ergosterol biosynthesis ERG4/ERG24 family	0	1	0
PF01223	DNA/RNA non-specific endonuclease	1	1	1
PF01227	GTP cyclohydrolase I	1	1	1
PF01230	HIT domain	1	1	1
PF01233	Myristoyl-CoA:protein N-myristoyltransferase, N-terminal domain	1	1	1
PF01237	Oxysterol-binding protein	4	4	1
PF01238	Phosphomannose isomerase type I	1	1	1
PF01239	Protein prenyltransferase alpha subunit repeat	2	3	0.666667
PF01242	6-pyruvoyl tetrahydropterin synthase	1	1	1
PF01243	Pyridoxamine 5'-phosphate oxidase	2	2	1
PF01244	Membrane dipeptidase (Peptidase family M19)	5	5	1
PF01245	Ribosomal protein L19	1	1	1
PF01246	Ribosomal protein L24e	2	2	1
PF01247	Ribosomal protein L35Ae	1	1	1
PF01248	Ribosomal protein L7Ae/L30e/S12e/Gadd45 family	6	6	1
PF01249	Ribosomal protein S21e	1	1	1
PF01250	Ribosomal protein S6	1	1	1
PF01251	Ribosomal protein S7e	1	1	1
PF01253	Translation initiation factor SUI1	3	3	1
PF01255	Putative undecaprenyl diphosphate synthase	1	2	0.5
PF01256	Carbohydrate kinase	1	1	1
PF01257	Thioredoxin-like [2Fe-2S] ferredoxin	1	1	1
PF01259	SAICAR synthetase	1	1	1
PF01261	Xylose isomerase-like TIM barrel	1	1	1
PF01263	Aldose 1-epimerase	4	4	1
PF01265	Cytochrome c/c1 heme lyase	1	1	1
PF01266	FAD dependent oxidoreductase	5	5	1
PF01267	F-actin capping protein alpha subunit	1	1	1
PF01268	Formate--tetrahydrofolate ligase	1	1	1
PF01269	Fibrillarin	1	1	1
PF01275	Myelin proteolipid protein (PLP or lipophilin)	1	1	1
PF01280	Ribosomal protein L19e	1	1	1
PF01281	Ribosomal protein L9, N-terminal domain	1	1	1
PF01282	Ribosomal protein S24e	1	1	1
PF01283	Ribosomal protein S26e	0	1	0
PF01284	Membrane-associating domain	5	6	0.833333
PF01285	TEA/ATTS domain family	2	1	2
PF01286	XPA protein N-terminal	1	1	1
PF01287	Eukaryotic elongation factor 5A hypusine, DNA-binding OB fold	1	1	1
PF01290	Thymosin beta-4 family	1	1	1
PF01294	Ribosomal protein L13e	1	1	1
PF01299	Lysosome-associated membrane glycoprotein (Lamp)	2	3	0.666667
PF01300	Telomere recombination	1	1	1
PF01301	Glycosyl hydrolases family 35	1	1	1
PF01302	CAP-Gly domain	7	6	1.16667
PF01315	Aldehyde oxidase and xanthine dehydrogenase, a/b hammerhead domain	2	2	1
PF01321	Creatinase/Prolidase N-terminal domain	2	2	1
PF01327	Polypeptide deformylase	1	1	1
PF01329	Pterin 4 alpha carbinolamine dehydratase	1	1	1
PF01331	mRNA capping enzyme, catalytic domain	1	1	1
PF01336	OB-fold nucleic acid binding domain	5	4	1.25
PF01342	SAND domain	1	1	1
PF01344	Kelch motif	11	13	0.846154
PF01347	Lipoprotein amino terminal region	8	10	0.8
PF01351	Ribonuclease HII	1	1	1
PF01359	Transposase (partial DDE domain)	4	0	#DIV/0!
PF01363	FYVE zinc finger	12	16	0.75
PF01365	RIH domain	3	1	3
PF01369	Sec7 domain	5	5	1
PF01370	NAD dependent epimerase/dehydratase family	5	5	1
PF01372	Melittin	1	1	1
PF01379	Porphobilinogen deaminase, dipyromethane cofactor binding domain	1	1	1
PF01380	SIS domain	1	1	1
PF01381	Helix-turn-helix	1	1	1
PF01382	Avidin family	0	1	0
PF01384	Phosphate transporter family	1	1	1
PF01388	ARID/BRIGHT DNA binding domain	6	7	0.857143
PF01390	SEA domain	4	3	1.33333
PF01391	Collagen triple helix repeat (20 copies)	11	10	1.1
PF01392	Fz domain	4	6	0.666667
PF01393	Chromo shadow domain	1	1	1
PF01394	Clathrin propeller repeat	1	1	1
PF01395	PBP/GOBP family	10	20	0.5
PF01396	Topoisomerase DNA binding C4 zinc finger	1	1	1
PF01398	JAB1/Mov34/MPN/PAD-1 ubiquitin protease	10	10	1
PF01399	PCI domain	14	16	0.875
PF01400	Astacin (Peptidase family M12A)	3	3	1
PF01401	Angiotensin-converting enzyme	4	4	1
PF01403	Sema domain	9	6	1.5
PF01404	Ephrin receptor ligand binding domain	1	1	1
PF01406	tRNA synthetases class I (C) catalytic domain	1	2	0.5
PF01408	Oxidoreductase family, NAD-binding Rossmann fold	3	3	1
PF01409	tRNA synthetases class II core domain (F)	1	2	0.5
PF01410	Fibrillar collagen C-terminal domain	2	2	1
PF01411	tRNA synthetases class II (A)	2	2	1
PF01412	Putative GTPase activating protein for Arf	9	9	1
PF01413	C-terminal tandem repeated domain in type 4 procollagen	3	2	1.5
PF01414	Delta serrate ligand	2	2	1
PF01416	tRNA pseudouridine synthase	1	3	0.333333
PF01417	ENTH domain	2	2	1
PF01421	Reprolysin (M12B) family zinc metalloprotease	4	6	0.666667
PF01422	NF-X1 type zinc finger	1	1	1
PF01423	LSM domain	16	17	0.941176
PF01424	R3H domain	6	5	1.2
PF01425	Amidase	4	4	1
PF01426	BAH domain	8	6	1.33333
PF01428	AN1-like Zinc finger	2	3	0.666667
PF01429	Methyl-CpG binding domain	3	4	0.75
PF01431	Peptidase family M13	9	11	0.818182
PF01432	Peptidase family M3	2	2	1
PF01433	Peptidase family M1 domain	12	11	1.09091
PF01434	Peptidase family M41	3	3	1
PF01435	Peptidase family M48	2	2	1
PF01436	NHL repeat	4	4	1
PF01437	Plexin repeat	4	5	0.8
PF01442	Apolipoprotein A1/A4/E domain	1	2	0.5
PF01448	ELM2 domain	4	5	0.8
PF01451	Low molecular weight phosphotyrosine protein phosphatase	2	2	1
PF01454	MAGE family	1	1	1
PF01457	Leishmanolysin	1	1	1
PF01459	Eukaryotic porin	4	3	1.33333
PF01462	Leucine rich repeat N-terminal domain	2	1	2
PF01465	GRIP domain	4	4	1
PF01466	Skp1 family, dimerisation domain	1	1	1
PF01467	Cytidylyltransferase-like	3	4	0.75
PF01470	Pyroglutamyl peptidase	1	1	1
PF01471	Putative peptidoglycan binding domain	3	2	1.5
PF01472	PUA domain	2	2	1
PF01476	LysM domain	1	1	1
PF01477	PLAT/LH2 domain	1	1	1
PF01479	S4 domain	3	3	1
PF01480	PWI domain	3	3	1
PF01483	Proprotein convertase P-domain	2	3	0.666667
PF01485	IBR domain, a half RING-finger domain	6	7	0.857143
PF01490	Transmembrane amino acid transporter protein	13	14	0.928571
PF01491	Frataxin-like domain	1	1	1
PF01493	GXGXG motif	1	1	1
PF01494	FAD binding domain	2	1	2
PF01496	V-type ATPase 116kDa subunit family	3	2	1.5
PF01498	Transposase	1	1	1
PF01501	Glycosyl transferase family 8	3	4	0.75
PF01504	Phosphatidylinositol-4-phosphate 5-Kinase	3	3	1
PF01507	Phosphoadenosine phosphosulfate reductase family	1	1	1
PF01509	TruB family pseudouridylate synthase (N terminal domain)	2	2	1
PF01510	N-acetylmuramoyl-L-alanine amidase	3	4	0.75
PF01512	Respiratory-chain NADH dehydrogenase 51 Kd subunit	1	1	1
PF01513	ATP-NAD kinase	3	2	1.5
PF01521	Iron-sulphur cluster biosynthesis	2	2	1
PF01522	Polysaccharide deacetylase	2	2	1
PF01529	DHHC palmitoyltransferase	10	12	0.833333
PF01530	Zinc finger, C2HC type	4	3	1.33333
PF01531	Glycosyl transferase family 11	1	1	1
PF01532	Glycosyl hydrolase family 47	5	4	1.25
PF01534	Frizzled/Smoothened family membrane region	3	3	1
PF01536	Adenosylmethionine decarboxylase	1	1	1
PF01541	GIY-YIG catalytic domain	1	1	1
PF01545	Cation efflux family	4	5	0.8
PF01546	Peptidase family M20/M25/M40	2	2	1
PF01553	Acyltransferase	12	13	0.923077
PF01556	DnaJ C terminal domain	5	5	1
PF01557	Fumarylacetoacetate (FAA) hydrolase family	2	2	1
PF01562	Reprolysin family propeptide	8	10	0.8
PF01564	Spermine/spermidine synthase domain	3	3	1
PF01565	FAD binding domain	2	2	1
PF01566	Natural resistance-associated macrophage protein	1	1	1
PF01569	PAP2 superfamily	6	6	1
PF01571	Aminomethyltransferase folate-binding domain	2	3	0.666667
PF01575	MaoC like domain	2	2	1
PF01576	Myosin tail	5	5	1
PF01582	TIR domain	5	5	1
PF01583	Adenylylsulphate kinase	2	2	1
PF01585	G-patch domain	14	14	1
PF01586	Myogenic Basic domain	1	1	1
PF01588	Putative tRNA binding domain	1	1	1
PF01590	GAF domain	3	3	1
PF01591	6-phosphofructo-2-kinase	2	2	1
PF01592	NifU-like N terminal domain	1	1	1
PF01593	Flavin containing amine oxidoreductase	8	6	1.33333
PF01595	Domain of unknown function DUF21	1	1	1
PF01597	Glycine cleavage H-protein	1	1	1
PF01599	Ribosomal protein S27a	1	1	1
PF01602	Adaptin N terminal region	7	7	1
PF01603	Protein phosphatase 2A regulatory B subunit (B56 family)	2	2	1
PF01607	Chitin binding Peritrophin-A domain	29	44	0.659091
PF01608	I/LWEQ domain	2	2	1
PF01612	3'-5' exonuclease	5	5	1
PF01619	Proline dehydrogenase	1	1	1
PF01624	MutS domain I	2	2	1
PF01625	Peptide methionine sulfoxide reductase	1	1	1
PF01630	Hyaluronidase	1	1	1
PF01632	Ribosomal protein L35	1	1	1
PF01633	Choline/ethanolamine kinase	1	2	0.5
PF01636	Phosphotransferase enzyme family	0	1	0
PF01641	SelR domain	1	1	1
PF01645	Conserved region in glutamate synthase	1	1	1
PF01648	4'-phosphopantetheinyl transferase superfamily	0	1	0
PF01650	Peptidase C13 family	1	1	1
PF01652	Eukaryotic initiation factor 4E	3	3	1
PF01655	Ribosomal protein L32	1	1	1
PF01658	Myo-inositol-1-phosphate synthase	1	1	1
PF01661	Macro domain	2	2	1
PF01663	Type I phosphodiesterase / nucleotide pyrophosphatase	3	3	1
PF01667	Ribosomal protein S27	1	1	1
PF01683	EB module	3	3	1
PF01687	Riboflavin kinase	1	1	1
PF01693	Caulimovirus viroplasmin	1	1	1
PF01694	Rhomboid family	3	6	0.5
PF01697	Glycosyltransferase family 92	3	4	0.75
PF01699	Sodium/calcium exchanger protein	8	7	1.14286
PF01702	Queuine tRNA-ribosyltransferase	2	2	1
PF01704	UTP--glucose-1-phosphate uridylyltransferase	2	2	1
PF01709	Transcriptional regulator	1	1	1
PF01712	Deoxynucleoside kinase	2	2	1
PF01715	IPP transferase	2	1	2
PF01722	BolA-like protein	3	2	1.5
PF01725	Ham1 family	1	1	1
PF01728	FtsJ-like methyltransferase	4	5	0.8
PF01733	Nucleoside transporter	3	3	1
PF01734	Patatin-like phospholipase	3	4	0.75
PF01740	STAS domain	4	5	0.8
PF01743	Poly A polymerase head domain	1	1	1
PF01746	tRNA (Guanine-1)-methyltransferase	1	2	0.5
PF01747	ATP-sulfurylase	2	2	1
PF01749	Importin beta binding domain	3	3	1
PF01751	Toprim domain	3	3	1
PF01753	MYND finger	12	14	0.857143
PF01754	A20-like zinc finger	2	2	1
PF01755	Glycosyltransferase family 25 (LPS biosynthesis protein)	1	1	1
PF01756	Acyl-CoA oxidase	2	2	1
PF01757	Acyltransferase family	4	6	0.666667
PF01759	UNC-6/NTR/C345C module	0	1	0
PF01762	Galactosyltransferase	5	6	0.833333
PF01764	Lipase (class 3)	2	2	1
PF01765	Ribosome recycling factor	1	1	1
PF01769	Divalent cation transporter	3	3	1
PF01770	Reduced folate carrier	1	1	1
PF01773	Na+ dependent nucleoside transporter N-terminus	0	1	0
PF01775	Ribosomal proteins 50S-L18Ae/60S-L20/60S-L18A	1	1	1
PF01776	Ribosomal L22e protein family	1	1	1
PF01777	Ribosomal L27e protein family	1	1	1
PF01778	Ribosomal L28e protein family	2	2	1
PF01779	Ribosomal L29e protein family	1	1	1
PF01780	Ribosomal L37ae protein family	1	1	1
PF01781	Ribosomal L38e protein family	1	1	1
PF01784	NIF3 (NGG1p interacting factor 3)	1	1	1
PF01791	DeoC/LacD family aldolase	1	1	1
PF01794	Ferric reductase like transmembrane component	1	2	0.5
PF01795	MraW methylase family	1	1	1
PF01798	snoRNA binding domain, fibrillarin	3	3	1
PF01799	[2Fe-2S] binding domain	2	2	1
PF01803	LIM-domain binding protein	0	1	0
PF01805	Surp module	4	5	0.8
PF01808	AICARFT/IMPCHase bienzyme	1	1	1
PF01812	5-formyltetrahydrofolate cyclo-ligase family	2	2	1
PF01813	ATP synthase subunit D	1	1	1
PF01822	WSC domain	2	2	1
PF01825	GPCR proteolysis site, GPS, motif	2	2	1
PF01826	Trypsin Inhibitor like cysteine rich domain	6	11	0.545455
PF01833	IPT/TIG domain	3	4	0.75
PF01834	XRCC1 N terminal domain	1	1	1
PF01835	MG2 domain	2	3	0.666667
PF01839	FG-GAP repeat	3	4	0.75
PF01841	Transglutaminase-like superfamily	2	2	1
PF01842	ACT domain	1	2	0.5
PF01843	DIL domain	2	2	1
PF01846	FF domain	2	2	1
PF01847	VHL beta domain	1	1	1
PF01849	NAC domain	2	2	1
PF01851	Proteasome/cyclosome repeat	3	3	1
PF01852	START domain	5	5	1
PF01853	MOZ/SAS family	4	4	1
PF01857	Retinoblastoma-associated protein B domain	1	1	1
PF01858	Retinoblastoma-associated protein A domain	1	1	1
PF01866	Putative diphthamide synthesis protein	2	2	1
PF01868	Domain of unknown function UPF0086	1	1	1
PF01869	BadF/BadG/BcrA/BcrD ATPase family	1	1	1
PF01871	AMMECR1	2	1	2
PF01873	Domain found in IF2B/IF5	2	2	1
PF01876	RNase P subunit p30	0	1	0
PF01883	Iron-sulfur cluster assembly protein	2	2	1
PF01894	Uncharacterised protein family UPF0047	1	1	1
PF01896	DNA primase small subunit	1	1	1
PF01900	Rpp14/Pop5 family	2	1	2
PF01902	Diphthamide synthase	1	1	1
PF01907	Ribosomal protein L37e	1	1	1
PF01909	Nucleotidyltransferase domain	2	2	1
PF01912	eIF-6 family	1	1	1
PF01916	Deoxyhypusine synthase	1	1	1
PF01918	Alba	2	2	1
PF01920	Prefoldin subunit	4	4	1
PF01922	SRP19 protein	1	1	1
PF01923	Cobalamin adenosyltransferase	1	1	1
PF01926	50S ribosome-binding GTPase	10	14	0.714286
PF01927	Mut7-C RNAse domain	1	1	1
PF01929	Ribosomal protein L14	1	1	1
PF01931	Protein of unknown function DUF84	1	1	1
PF01936	NYN domain	1	1	1
PF01937	Protein of unknown function DUF89	2	2	1
PF01938	TRAM domain	0	1	0
PF01940	Integral membrane protein DUF92	1	1	1
PF01946	Thi4 family	1	0	#DIV/0!
PF01951	Archease protein family (MTH1598/TM1083)	0	1	0
PF01956	Integral membrane protein DUF106	2	2	1
PF01963	TraB family	1	1	1
PF01965	DJ-1/PfpI family	1	1	1
PF01967	MoaC family	1	1	1
PF01968	Hydantoinase/oxoprolinase	1	1	1
PF01974	tRNA intron endonuclease, catalytic C-terminal domain	2	2	1
PF01979	Amidohydrolase family	3	4	0.75
PF01980	Uncharacterised protein family UPF0066	1	1	1
PF01981	Peptidyl-tRNA hydrolase PTH2	3	3	1
PF01984	Double-stranded DNA-binding domain	1	1	1
PF01990	ATP synthase (F/14-kDa) subunit	0	1	0
PF01991	ATP synthase (E/31 kDa) subunit	1	1	1
PF01992	ATP synthase (C/AC39) subunit	1	1	1
PF01997	Translin family	2	2	1
PF02002	TFIIE alpha subunit	1	1	1
PF02005	N2,N2-dimethylguanosine tRNA methyltransferase	1	1	1
PF02008	CXXC zinc finger domain	5	4	1.25
PF02014	Reeler domain	4	4	1
PF02017	CIDE-N domain	3	3	1
PF02019	WIF domain	4	3	1.33333
PF02020	eIF4-gamma/eIF5/eIF2-epsilon	3	4	0.75
PF02026	RyR domain	2	1	2
PF02033	Ribosome-binding factor A	0	1	0
PF02036	SCP-2 sterol transfer family	2	3	0.666667
PF02037	SAP domain	5	5	1
PF02045	CCAAT-binding transcription factor (CBF-B/NF-YA) subunit B	1	1	1
PF02046	Cytochrome c oxidase subunit VIa	1	2	0.5
PF02055	Glycosyl hydrolase family 30 TIM-barrel domain	2	2	1
PF02064	MAS20 protein import receptor	1	1	1
PF02077	SURF4 family	1	1	1
PF02078	Synapsin, N-terminal domain	1	1	1
PF02089	Palmitoyl protein thioesterase	1	2	0.5
PF02096	60Kd inner membrane protein	2	2	1
PF02099	Josephin	2	2	1
PF02100	Ornithine decarboxylase antizyme	1	1	1
PF02101	Ocular albinism type 1 protein	1	1	1
PF02104	SURF1 family	1	1	1
PF02109	DAD family	1	1	1
PF02114	Phosducin	2	2	1
PF02115	RHO protein GDP dissociation inhibitor	1	1	1
PF02121	Phosphatidylinositol transfer protein	3	3	1
PF02126	Phosphotriesterase family	1	1	1
PF02135	TAZ zinc finger	1	2	0.5
PF02136	Nuclear transport factor 2 (NTF2) domain	4	6	0.666667
PF02137	Adenosine-deaminase (editase) domain	2	2	1
PF02138	Beige/BEACH domain	5	5	1
PF02140	Galactose binding lectin domain	2	2	1
PF02141	DENN (AEX-3) domain	5	5	1
PF02142	MGS-like domain	1	2	0.5
PF02144	Repair protein Rad1/Rec1/Rad17	1	1	1
PF02145	Rap/ran-GAP	5	6	0.833333
PF02146	Sir2 family	6	6	1
PF02148	Zn-finger in ubiquitin-hydrolases and other protein	6	8	0.75
PF02149	Kinase associated domain 1	3	3	1
PF02150	RNA polymerases M/15 Kd subunit	2	2	1
PF02163	Peptidase family M50	1	1	1
PF02167	Cytochrome C1 family	1	2	0.5
PF02170	PAZ domain	5	5	1
PF02171	Piwi domain	3	4	0.75
PF02172	KIX domain	1	2	0.5
PF02173	pKID domain	1	1	1
PF02174	PTB domain (IRS-1 type)	4	5	0.8
PF02176	TRAF-type zinc finger	1	1	1
PF02177	Amyloid A4 N-terminal heparin-binding	1	1	1
PF02179	BAG domain	1	1	1
PF02181	Formin Homology 2 Domain	5	6	0.833333
PF02182	SAD/SRA domain	1	2	0.5
PF02184	HAT (Half-A-TPR) repeat	1	1	1
PF02185	Hr1 repeat	0	1	0
PF02186	TFIIE beta subunit core domain	1	1	1
PF02187	Growth-Arrest-Specific Protein 2 Domain	1	3	0.333333
PF02188	GoLoco motif	1	2	0.5
PF02190	ATP-dependent protease La (LON) substrate-binding domain	3	3	1
PF02191	Olfactomedin-like domain	0	1	0
PF02192	PI3-kinase family, p85-binding domain	1	1	1
PF02194	PXA domain	4	4	1
PF02196	Raf-like Ras-binding domain	2	3	0.666667
PF02197	Regulatory subunit of type II PKA R-subunit	2	2	1
PF02198	Sterile alpha motif (SAM)/Pointed domain	3	5	0.6
PF02199	Saposin A-type domain	1	1	1
PF02201	SWIB/MDM2 domain	2	2	1
PF02204	Vacuolar sorting protein 9 (VPS9) domain	4	4	1
PF02205	WH2 motif	1	1	1
PF02207	Putative zinc finger in N-recognin (UBR box)	5	5	1
PF02208	Sorbin homologous domain	0	1	0
PF02209	Villin headpiece domain	3	3	1
PF02210	Laminin G domain	18	17	1.05882
PF02212	Dynamin GTPase effector domain	2	2	1
PF02213	GYF domain	2	2	1
PF02214	BTB/POZ domain	11	11	1
PF02219	Methylenetetrahydrofolate reductase	1	1	1
PF02221	ML domain	4	4	1
PF02223	Thymidylate kinase	1	1	1
PF02225	PA domain	3	3	1
PF02229	Transcriptional Coactivator p15 (PC4)	1	1	1
PF02230	Phospholipase/Carboxylesterase	2	2	1
PF02234	Cyclin-dependent kinase inhibitor	2	2	1
PF02237	Biotin protein ligase C terminal domain	1	1	1
PF02244	Carboxypeptidase activation peptide	4	4	1
PF02245	Methylpurine-DNA glycosylase (MPG)	0	1	0
PF02251	Proteasome activator pa28 alpha subunit	1	1	1
PF02252	Proteasome activator pa28 beta subunit	1	1	1
PF02256	Iron hydrogenase small subunit	0	1	0
PF02257	RFX DNA-binding domain	3	3	1
PF02259	FAT domain	3	5	0.6
PF02260	FATC domain	5	5	1
PF02262	CBL proto-oncogene N-terminal domain 1	1	1	1
PF02263	Guanylate-binding protein, N-terminal domain	1	1	1
PF02268	Transcription initiation factor IIA, gamma subunit, helical domain	1	1	1
PF02269	Transcription initiation factor IID, 18kD subunit	2	2	1
PF02270	Transcription initiation factor IIF, beta subunit	1	1	1
PF02271	Ubiquinol-cytochrome C reductase complex 14kD subunit	2	2	1
PF02272	DHHA1 domain	1	1	1
PF02284	Cytochrome c oxidase subunit Va	1	1	1
PF02290	Signal recognition particle 14kD protein	1	1	1
PF02291	Transcription initiation factor IID, 31kD subunit	1	1	1
PF02296	Alpha adaptin AP2, C-terminal domain	1	1	1
PF02297	Cytochrome oxidase c subunit VIb	3	2	1.5
PF02301	HORMA domain	2	2	1
PF02312	Core binding factor beta subunit	1	1	1
PF02318	FYVE-type zinc finger	3	3	1
PF02319	E2F/DP family winged-helix DNA-binding domain	3	3	1
PF02320	Ubiquinol-cytochrome C reductase hinge protein	1	1	1
PF02330	Mitochondrial glycoprotein	1	1	1
PF02338	OTU-like cysteine protease	5	6	0.833333
PF02347	Glycine cleavage system P-protein	1	1	1
PF02351	GDNF/GAS1 domain	1	2	0.5
PF02358	Trehalose-phosphatase	1	1	1
PF02359	Cell division protein 48 (CDC48), N-terminal domain	2	2	1
PF02366	Dolichyl-phosphate-mannose-protein mannosyltransferase	2	2	1
PF02373	JmjC domain, hydroxylase	7	7	1
PF02374	Anion-transporting ATPase	1	1	1
PF02375	jmjN domain	3	3	1
PF02376	CUT domain	2	2	1
PF02377	Dishevelled specific domain	1	1	1
PF02383	SacI homology domain	4	4	1
PF02390	Putative methyltransferase	1	1	1
PF02391	MoaE protein	0	1	0
PF02403	Seryl-tRNA synthetase N-terminal domain	1	1	1
PF02410	Ribosomal silencing factor during starvation	1	1	1
PF02412	Thrombospondin type 3 repeat	1	1	1
PF02434	Fringe-like	4	3	1.33333
PF02436	Conserved carboxylase domain	1	1	1
PF02437	SKI/SNO/DAC family	3	3	1
PF02441	Flavoprotein	1	1	1
PF02450	Lecithin:cholesterol acyltransferase	1	1	1
PF02453	Reticulon	1	1	1
PF02460	Patched family	5	7	0.714286
PF02463	RecF/RecN/SMC N terminal domain	6	8	0.75
PF02466	Tim17/Tim22/Tim23/Pmp24 family	5	5	1
PF02469	Fasciclin domain	4	3	1.33333
PF02475	Met-10+ like-protein	0	1	0
PF02485	Core-2/I-Branching enzyme	1	1	1
PF02487	CLN3 protein	1	1	1
PF02493	MORN repeat	1	1	1
PF02494	HYR domain	3	4	0.75
PF02515	CoA-transferase family III	2	2	1
PF02516	Oligosaccharyl transferase STT3 subunit	2	2	1
PF02517	CAAX protease self-immunity	1	1	1
PF02518	Histidine kinase-, DNA gyrase B-, and HSP90-like ATPase	5	5	1
PF02535	ZIP Zinc transporter	7	8	0.875
PF02536	mTERF	0	1	0
PF02538	Hydantoinase B/oxoprolinase	1	1	1
PF02540	NAD synthase	2	2	1
PF02544	3-oxo-5-alpha-steroid 4-dehydrogenase	2	2	1
PF02545	Maf-like protein	1	1	1
PF02550	Acetyl-CoA hydrolase/transferase N-terminal domain	2	2	1
PF02574	Homocysteine S-methyltransferase	2	2	1
PF02580	D-Tyr-tRNA(Tyr) deacylase	1	1	1
PF02582	Uncharacterised ACR, YagE family COG1723	1	1	1
PF02585	GlcNAc-PI de-N-acetylase	1	1	1
PF02586	SOS response associated peptidase (SRAP)	1	1	1
PF02594	Uncharacterised ACR, YggU family COG1872	1	1	1
PF02597	ThiS family	0	1	0
PF02598	Putative RNA methyltransferase	1	1	1
PF02602	Uroporphyrinogen-III synthase HemD	1	1	1
PF02615	Malate/L-lactate dehydrogenase	1	1	1
PF02617	ATP-dependent Clp protease adaptor protein ClpS	1	1	1
PF02628	Cytochrome oxidase assembly protein	1	1	1
PF02629	CoA binding domain	2	2	1
PF02630	SCO1/SenC	1	1	1
PF02636	Putative S-adenosyl-L-methionine-dependent methyltransferase	1	1	1
PF02637	GatB domain	1	1	1
PF02661	Fic/DOC family	1	1	1
PF02666	Phosphatidylserine decarboxylase	1	1	1
PF02671	Paired amphipathic helix repeat	1	1	1
PF02709	N-terminal domain of galactosyltransferase	3	3	1
PF02714	Calcium-dependent channel, 7TM region, putative phosphate	1	1	1
PF02724	CDC45-like protein	1	1	1
PF02729	Aspartate/ornithine carbamoyltransferase, carbamoyl-P binding domain	1	1	1
PF02731	SKIP/SNW domain	1	1	1
PF02732	ERCC4 domain	1	3	0.333333
PF02733	Dak1 domain	2	2	1
PF02734	DAK2 domain	2	2	1
PF02735	Ku70/Ku80 beta-barrel domain	2	2	1
PF02736	Myosin N-terminal SH3-like domain	2	2	1
PF02737	3-hydroxyacyl-CoA dehydrogenase, NAD binding domain	2	2	1
PF02738	Molybdopterin-binding domain of aldehyde dehydrogenase	2	2	1
PF02743	Cache domain	0	1	0
PF02744	Galactose-1-phosphate uridyl transferase, C-terminal domain	1	1	1
PF02746	Mandelate racemase / muconate lactonizing enzyme, N-terminal domain	1	1	1
PF02747	Proliferating cell nuclear antigen, C-terminal domain	1	1	1
PF02750	Synapsin, ATP binding domain	1	1	1
PF02751	Transcription initiation factor IIA, gamma subunit	1	1	1
PF02752	Arrestin (or S-antigen), C-terminal domain	9	8	1.125
PF02755	RPEL repeat	2	2	1
PF02759	RUN domain	9	9	1
PF02761	CBL proto-oncogene N-terminus, EF hand-like domain	1	1	1
PF02762	CBL proto-oncogene N-terminus, SH2-like domain	1	1	1
PF02769	AIR synthase related protein, C-terminal domain	3	3	1
PF02770	Acyl-CoA dehydrogenase, middle domain	8	9	0.888889
PF02771	Acyl-CoA dehydrogenase, N-terminal domain	6	7	0.857143
PF02772	S-adenosylmethionine synthetase, central domain	1	1	1
PF02773	S-adenosylmethionine synthetase, C-terminal domain	1	1	1
PF02775	Thiamine pyrophosphate enzyme, C-terminal TPP binding domain	1	1	1
PF02776	Thiamine pyrophosphate enzyme, N-terminal TPP binding domain	0	1	0
PF02777	Iron/manganese superoxide dismutases, C-terminal domain	1	1	1
PF02779	Transketolase, pyrimidine binding domain	7	7	1
PF02780	Transketolase, C-terminal domain	4	4	1
PF02781	Glucose-6-phosphate dehydrogenase, C-terminal domain	1	1	1
PF02782	FGGY family of carbohydrate kinases, C-terminal domain	6	6	1
PF02784	Pyridoxal-dependent decarboxylase, pyridoxal binding domain	1	1	1
PF02785	Biotin carboxylase C-terminal domain	3	3	1
PF02786	Carbamoyl-phosphate synthase L chain, ATP binding domain	4	4	1
PF02787	Carbamoyl-phosphate synthetase large chain, oligomerisation domain	1	1	1
PF02789	Cytosol aminopeptidase family, N-terminal domain	1	1	1
PF02790	Cytochrome C oxidase subunit II, transmembrane domain	0	1	0
PF02791	DDT domain	3	3	1
PF02792	Mago nashi protein	0	1	0
PF02793	Hormone receptor domain	5	6	0.833333
PF02798	Glutathione S-transferase, N-terminal domain	6	6	1
PF02799	Myristoyl-CoA:protein N-myristoyltransferase, C-terminal domain	1	1	1
PF02800	Glyceraldehyde 3-phosphate dehydrogenase, C-terminal domain	2	2	1
PF02801	Beta-ketoacyl synthase, C-terminal domain	3	3	1
PF02803	Thiolase, C-terminal domain	5	5	1
PF02806	Alpha amylase, C-terminal all-beta domain	2	2	1
PF02807	ATP:guanido phosphotransferase, N-terminal domain	3	2	1.5
PF02812	Glu/Leu/Phe/Val dehydrogenase, dimerisation domain	1	1	1
PF02815	MIR domain	5	4	1.25
PF02817	e3 binding domain	2	2	1
PF02820	mbt repeat	4	4	1
PF02822	Antistasin family	2	2	1
PF02823	ATP synthase, Delta/Epsilon chain, beta-sandwich domain	1	1	1
PF02824	TGS domain	4	3	1.33333
PF02825	WWE domain	4	4	1
PF02826	D-isomer specific 2-hydroxyacid dehydrogenase, NAD binding domain	4	5	0.8
PF02827	cAMP-dependent protein kinase inhibitor	1	1	1
PF02828	L27 domain	3	4	0.75
PF02833	DHHA2 domain	1	1	1
PF02836	Glycosyl hydrolases family 2, TIM barrel domain	2	2	1
PF02837	Glycosyl hydrolases family 2, sugar binding domain	2	2	1
PF02838	Glycosyl hydrolase family 20, domain 2	1	1	1
PF02840	Prp18 domain	1	1	1
PF02841	Guanylate-binding protein, C-terminal domain	1	1	1
PF02843	Phosphoribosylglycinamide synthetase, C domain	1	1	1
PF02844	Phosphoribosylglycinamide synthetase, N domain	1	1	1
PF02845	CUE domain	3	3	1
PF02847	MA3 domain	4	4	1
PF02852	Pyridine nucleotide-disulphide oxidoreductase, dimerisation domain	3	3	1
PF02854	MIF4G domain	6	6	1
PF02862	DDHD domain	3	3	1
PF02864	STAT protein, DNA binding domain	1	1	1
PF02865	STAT protein, protein interaction domain	1	1	1
PF02866	lactate/malate dehydrogenase, alpha/beta C-terminal domain	8	9	0.888889
PF02867	Ribonucleotide reductase, barrel domain	1	1	1
PF02872	5'-nucleotidase, C-terminal domain	2	2	1
PF02874	ATP synthase alpha/beta family, beta-barrel domain	4	4	1
PF02877	Poly(ADP-ribose) polymerase, regulatory domain	1	1	1
PF02878	Phosphoglucomutase/phosphomannomutase, alpha/beta/alpha domain I	3	3	1
PF02879	Phosphoglucomutase/phosphomannomutase, alpha/beta/alpha domain II	2	2	1
PF02880	Phosphoglucomutase/phosphomannomutase, alpha/beta/alpha domain III	2	2	1
PF02881	SRP54-type protein, helical bundle domain	2	2	1
PF02882	Tetrahydrofolate dehydrogenase/cyclohydrolase, NAD(P)-binding domain	2	2	1
PF02883	Adaptin C-terminal domain	4	4	1
PF02887	Pyruvate kinase, alpha/beta domain	1	2	0.5
PF02888	Calmodulin binding domain	0	1	0
PF02889	Sec63 Brl domain	3	3	1
PF02891	MIZ/SP-RING zinc finger	2	2	1
PF02892	BED zinc finger	1	2	0.5
PF02893	GRAM domain	6	6	1
PF02894	Oxidoreductase family, C-terminal alpha/beta domain	1	1	1
PF02897	Prolyl oligopeptidase, N-terminal beta-propeller domain	1	1	1
PF02898	Nitric oxide synthase, oxygenase domain	1	1	1
PF02902	Ulp1 protease family, C-terminal catalytic domain	2	4	0.5
PF02906	Iron only hydrogenase large subunit, C-terminal domain	1	1	1
PF02910	Fumarate reductase flavoprotein C-term	2	2	1
PF02911	Formyl transferase, C-terminal domain	2	2	1
PF02913	FAD linked oxidases, C-terminal domain	2	2	1
PF02919	Eukaryotic DNA topoisomerase I, DNA binding fragment	1	1	1
PF02921	Ubiquinol cytochrome reductase transmembrane region	2	2	1
PF02922	Carbohydrate-binding module 48 (Isoamylase N-terminal domain)	1	1	1
PF02926	THUMP domain	2	2	1
PF02928	C5HC2 zinc finger	2	2	1
PF02931	Neurotransmitter-gated ion-channel ligand binding domain	17	21	0.809524
PF02932	Neurotransmitter-gated ion-channel transmembrane region	18	19	0.947368
PF02933	Cell division protein 48 (CDC48), domain 2	2	2	1
PF02934	GatB/GatE catalytic domain	1	1	1
PF02935	Cytochrome c oxidase subunit VIIc	0	1	0
PF02936	Cytochrome c oxidase subunit IV	1	1	1
PF02937	Cytochrome c oxidase subunit VIc	1	1	1
PF02939	UcrQ family	1	2	0.5
PF02944	BESS motif	5	4	1.25
PF02949	7tm Odorant receptor	63	137	0.459854
PF02953	Tim10/DDP family zinc finger	4	5	0.8
PF02958	Ecdysteroid kinase	11	12	0.916667
PF02961	Barrier to autointegration factor	1	1	1
PF02966	Mitosis protein DIM1	1	1	1
PF02969	TATA box binding protein associated factor (TAF)	2	2	1
PF02970	Tubulin binding cofactor A	1	1	1
PF02978	Signal peptide binding domain	1	1	1
PF02984	Cyclin, C-terminal domain	4	5	0.8
PF02990	Endomembrane protein 70	3	3	1
PF02991	Autophagy protein Atg8 ubiquitin like	2	2	1
PF02995	Protein of unknown function (DUF229)	3	3	1
PF02996	Prefoldin subunit	3	4	0.75
PF03006	Haemolysin-III related	4	4	1
PF03009	Glycerophosphoryl diester phosphodiesterase family	3	3	1
PF03015	Male sterility protein	10	10	1
PF03016	Exostosin family	3	3	1
PF03020	LEM domain	2	2	1
PF03022	Major royal jelly protein	15	20	0.75
PF03028	Dynein heavy chain and region D6 of dynein motor	16	15	1.06667
PF03029	Conserved hypothetical ATP binding protein	3	3	1
PF03031	NLI interacting factor-like phosphatase	6	6	1
PF03034	Phosphatidyl serine synthase	1	1	1
PF03036	Perilipin family	4	2	2
PF03045	DAN domain	2	2	1
PF03051	Peptidase C1-like family	1	1	1
PF03054	tRNA methyl transferase	1	1	1
PF03055	Retinal pigment epithelial membrane protein	1	1	1
PF03061	Thioesterase superfamily	1	1	1
PF03062	MBOAT, membrane-bound O-acyltransferase family	3	7	0.428571
PF03066	Nucleoplasmin/nucleophosmin domain	1	1	1
PF03067	Lytic polysaccharide mono-oxygenase, cellulose-degrading	4	4	1
PF03071	GNT-I family	1	1	1
PF03073	TspO/MBR family	1	1	1
PF03074	Glutamate-cysteine ligase	1	1	1
PF03079	ARD/ARD' family	1	1	1
PF03081	Exo70 exocyst complex subunit	1	1	1
PF03083	Sugar efflux transporter for intercellular exchange	2	2	1
PF03088	Strictosidine synthase	1	1	1
PF03091	CutA1 divalent ion tolerance protein	1	1	1
PF03095	Phosphotyrosyl phosphate activator (PTPA) protein	1	1	1
PF03096	Ndr family	1	1	1
PF03097	BRO1-like domain	3	3	1
PF03098	Animal haem peroxidase	9	9	1
PF03099	Biotin/lipoate A/B protein ligase family	1	3	0.333333
PF03101	FAR1 DNA-binding domain	1	1	1
PF03103	Domain of unknown function (DUF243)	2	2	1
PF03104	DNA polymerase family B, exonuclease domain	3	4	0.75
PF03105	SPX domain	2	2	1
PF03109	ABC1 family	2	3	0.666667
PF03114	BAR domain	6	6	1
PF03121	Herpesviridae UL52/UL70 DNA primase	1	1	1
PF03124	EXS family	2	2	1
PF03126	Plus-3 domain	1	1	1
PF03127	GAT domain	2	2	1
PF03129	Anticodon binding domain	5	5	1
PF03131	bZIP Maf transcription factor	3	3	1
PF03133	Tubulin-tyrosine ligase family	10	11	0.909091
PF03134	TB2/DP1, HVA22 family	2	2	1
PF03137	Organic Anion Transporter Polypeptide (OATP) family	5	6	0.833333
PF03142	Chitin synthase	2	2	1
PF03143	Elongation factor Tu C-terminal domain	5	5	1
PF03144	Elongation factor Tu domain 2	10	10	1
PF03145	Seven in absentia protein family	1	1	1
PF03147	Ferredoxin-fold anticodon binding domain	0	1	0
PF03148	Tektin family	5	5	1
PF03151	Triose-phosphate Transporter family	3	5	0.6
PF03152	Ubiquitin fusion degradation protein UFD1	1	1	1
PF03153	Transcription factor IIA, alpha/beta subunit	1	1	1
PF03154	Atrophin-1 family	1	1	1
PF03155	ALG6, ALG8 glycosyltransferase family	1	2	0.5
PF03159	XRN 5'-3' exonuclease N-terminus	2	2	1
PF03160	Calx-beta domain	2	1	2
PF03164	Trafficking protein Mon1	1	1	1
PF03165	MH1 domain	5	5	1
PF03166	MH2 domain	5	5	1
PF03167	Uracil DNA glycosylase superfamily	1	3	0.333333
PF03171	2OG-Fe(II) oxygenase superfamily	2	2	1
PF03177	Non-repetitive/WGA-negative nucleoporin C-terminal	2	2	1
PF03178	CPSF A subunit region	3	3	1
PF03179	Vacuolar (H+)-ATPase G subunit	1	1	1
PF03184	DDE superfamily endonuclease	0	1	0
PF03188	Eukaryotic cytochrome b561	3	3	1
PF03189	Otopetrin	5	4	1.25
PF03190	Protein of unknown function, DUF255	1	1	1
PF03194	LUC7 N_terminus	2	1	2
PF03199	Eukaryotic glutathione synthase	2	2	1
PF03200	Glycosyl hydrolase family 63 C-terminal domain	1	1	1
PF03208	PRA1 family protein	2	2	1
PF03215	Rad17 cell cycle checkpoint protein	1	1	1
PF03221	Tc5 transposase DNA-binding domain	1	2	0.5
PF03223	V-ATPase subunit C	1	1	1
PF03224	V-ATPase subunit H	1	1	1
PF03226	Yippee zinc-binding/DNA-binding /Mis18, centromere assembly	3	3	1
PF03227	Gamma interferon inducible lysosomal thiol reductase (GILT)	2	2	1
PF03232	Ubiquinone biosynthesis protein COQ7	0	1	0
PF03234	Cdc37 N terminal kinase binding	1	1	1
PF03248	Rer1 family	1	1	1
PF03250	Tropomodulin	1	1	1
PF03253	Urea transporter	2	1	2
PF03256	Anaphase-promoting complex, subunit 10 (APC10)	1	1	1
PF03259	Roadblock/LC7 domain	2	2	1
PF03261	Cyclin-dependent kinase 5 activator protein	2	1	2
PF03265	Deoxyribonuclease II	1	1	1
PF03266	NTPase	1	1	1
PF03271	EB1-like C-terminal motif	1	1	1
PF03281	Mab-21 protein	4	4	1
PF03283	Pectinacetylesterase	1	1	1
PF03291	mRNA capping enzyme	1	1	1
PF03297	S25 ribosomal protein	1	1	1
PF03299	Transcription factor AP-2	1	1	1
PF03301	Tryptophan 2,3-dioxygenase	1	1	1
PF03311	Cornichon protein	2	2	1
PF03332	Eukaryotic phosphomannomutase	1	1	1
PF03343	SART-1 family	1	1	1
PF03344	Daxx N-terminal Rassf1C-interacting domain	1	1	1
PF03345	Oligosaccharyltransferase 48 kDa subunit beta	1	1	1
PF03348	Serine incorporator (Serinc)	1	1	1
PF03351	DOMON domain	8	8	1
PF03357	Snf7	7	7	1
PF03359	Guanylate-kinase-associated protein (GKAP) protein	2	2	1
PF03360	Glycosyltransferase family 43	2	2	1
PF03364	Polyketide cyclase / dehydrase and lipid transport	1	1	1
PF03366	YEATS family	3	3	1
PF03367	ZPR1 zinc-finger domain	1	1	1
PF03368	Dicer dimerisation domain	2	2	1
PF03370	Carbohydrate/starch-binding module (family 21)	2	2	1
PF03371	PRP38 family	2	2	1
PF03372	Endonuclease/Exonuclease/phosphatase family	8	7	1.14286
PF03378	CAS/CSE protein, C-terminus	1	1	1
PF03381	LEM3 (ligand-effect modulator 3) family / CDC50 family	1	1	1
PF03388	Legume-like lectin family	2	2	1
PF03392	Insect pheromone-binding family, A10/OS-D	4	6	0.666667
PF03398	Regulator of Vps4 activity in the MVB pathway	1	1	1
PF03399	SAC3/GANP family	2	3	0.666667
PF03404	Mo-co oxidoreductase dimerisation domain	1	1	1
PF03416	Peptidase family C54	2	2	1
PF03417	Acyl-coenzyme A:6-aminopenicillanic acid acyl-transferase	1	1	1
PF03435	Saccharopine dehydrogenase NADP binding domain	2	2	1
PF03437	BtpA family	1	1	1
PF03439	Early transcription elongation factor of RNA pol II, NGN section	1	1	1
PF03441	FAD binding domain of DNA photolyase	1	1	1
PF03446	NAD binding domain of 6-phosphogluconate dehydrogenase	4	3	1.33333
PF03450	CO dehydrogenase flavoprotein C-terminal domain	2	2	1
PF03451	HELP motif	2	2	1
PF03453	MoeA N-terminal region (domain I and II)	1	1	1
PF03454	MoeA C-terminal region (domain IV)	1	1	1
PF03455	dDENN domain	3	3	1
PF03456	uDENN domain	2	5	0.4
PF03462	PCRF domain	1	1	1
PF03463	eRF1 domain 1	2	2	1
PF03464	eRF1 domain 2	2	2	1
PF03465	eRF1 domain 3	2	2	1
PF03467	Smg-4/UPF3 family	1	1	1
PF03473	MOSC domain	3	3	1
PF03474	DMRTA motif	2	2	1
PF03476	MOSC N-terminal beta barrel domain	3	3	1
PF03477	ATP cone domain	1	1	1
PF03483	B3/4 domain	2	2	1
PF03484	tRNA synthetase B5 domain	1	1	1
PF03485	Arginyl tRNA synthetase N terminal domain	1	1	1
PF03489	Saposin-like type B, region 2	1	1	1
PF03493	Calcium-activated BK potassium channel alpha subunit	2	2	1
PF03501	Plectin/S10 domain	1	1	1
PF03517	Regulator of volume decrease after cellular swelling	1	1	1
PF03520	KCNQ voltage-gated potassium channel	1	1	1
PF03522	Solute carrier family 12	4	4	1
PF03528	Rabaptin	1	1	1
PF03530	Calcium-activated SK potassium channel	2	1	2
PF03531	Structure-specific recognition protein (SSRP1)	1	1	1
PF03540	Transcription initiation factor TFIID 23-30kDa subunit	1	1	1
PF03542	Tuberin	1	1	1
PF03547	Membrane transport protein	1	1	1
PF03556	Cullin binding	3	3	1
PF03567	Sulfotransferase family	7	8	0.875
PF03568	Peptidase family C50	0	1	0
PF03571	Peptidase family M49	1	1	1
PF03587	EMG1/NEP1 methyltransferase	1	1	1
PF03600	Citrate transporter	1	1	1
PF03604	DNA directed RNA polymerase, 7 kDa subunit	0	1	0
PF03607	Doublecortin	2	2	1
PF03615	GCM motif protein	1	1	1
PF03619	Organic solute transporter Ostalpha	2	3	0.666667
PF03623	Focal adhesion targeting region	1	1	1
PF03630	Fumble	2	2	1
PF03635	Vacuolar protein sorting-associated protein 35	2	1	2
PF03637	Mob1/phocein family	4	4	1
PF03638	Tesmin/TSO1-like CXC domain, cysteine-rich domain	0	1	0
PF03643	Vacuolar protein sorting-associated protein 26	2	2	1
PF03644	Glycosyl hydrolase family 85	1	1	1
PF03645	Tctex-1 family	4	4	1
PF03647	Transmembrane proteins 14C	1	1	1
PF03650	Uncharacterised protein family (UPF0041)	4	3	1.33333
PF03656	Pam16	1	1	1
PF03657	Uncharacterised protein family (UPF0113)	1	1	1
PF03660	PHF5-like protein	1	1	1
PF03661	Uncharacterised protein family (UPF0121)	1	1	1
PF03662	Glycosyl hydrolase family 79, N-terminal domain	1	1	1
PF03665	Uncharacterised protein family (UPF0172)	1	1	1
PF03666	Nitrogen Permease regulator of amino acid transport activity 3	1	1	1
PF03669	Uncharacterised protein family (UPF0139)	1	1	1
PF03670	Uncharacterised protein family (UPF0184)	1	0	#DIV/0!
PF03671	Ubiquitin fold modifier 1 protein	1	1	1
PF03676	Uncharacterised protein family (UPF0183)	1	1	1
PF03690	Uncharacterised protein family (UPF0160)	0	1	0
PF03712	Copper type II ascorbate-dependent monooxygenase, C-terminal domain	4	4	1
PF03715	Noc2p family	1	1	1
PF03719	Ribosomal protein S5, C-terminal domain	2	2	1
PF03720	UDP-glucose/GDP-mannose dehydrogenase family, UDP binding domain	1	1	1
PF03721	UDP-glucose/GDP-mannose dehydrogenase family, NAD binding domain	1	1	1
PF03722	Hemocyanin, all-alpha domain	4	5	0.8
PF03723	Hemocyanin, ig-like domain	5	5	1
PF03725	3' exoribonuclease family, domain 2	2	3	0.666667
PF03726	Polyribonucleotide nucleotidyltransferase, RNA binding domain	0	1	0
PF03727	Hexokinase	2	2	1
PF03730	Ku70/Ku80 C-terminal arm	2	2	1
PF03731	Ku70/Ku80 N-terminal alpha/beta domain	1	1	1
PF03735	ENT domain	1	1	1
PF03747	ADP-ribosylglycohydrolase	1	1	1
PF03764	Elongation factor G, domain IV	4	4	1
PF03765	CRAL/TRIO, N-terminal domain	3	4	0.75
PF03770	Inositol polyphosphate kinase	4	4	1
PF03781	Sulfatase-modifying factor enzyme 1	1	1	1
PF03782	AMOP domain	2	2	1
PF03792	PBC domain	2	1	2
PF03798	TLC domain	2	2	1
PF03800	Nuf2 family	1	1	1
PF03801	HEC/Ndc80p family	0	1	0
PF03803	Scramblase	1	2	0.5
PF03807	NADP oxidoreductase coenzyme F420-dependent	2	2	1
PF03810	Importin-beta N-terminal domain	10	9	1.11111
PF03813	Nrap protein domain 1	0	1	0
PF03820	Tricarboxylate carrier	2	2	1
PF03826	OAR domain	5	4	1.25
PF03828	Cid1 family poly A polymerase	3	4	0.75
PF03834	Binding domain of DNA repair protein Ercc1 (rad10/Swi10)	1	1	1
PF03835	Rad4 transglutaminase-like domain	2	2	1
PF03836	RasGAP C-terminus	1	1	1
PF03839	Translocation protein Sec62	1	1	1
PF03847	Transcription initiation factor TFIID subunit A	1	1	1
PF03849	Transcription factor Tfb2	1	1	1
PF03850	Transcription factor Tfb4	1	1	1
PF03853	YjeF-related protein N-terminus	2	2	1
PF03859	CG-1 domain	0	1	0
PF03868	Ribosomal protein L6, N-terminal domain	1	1	1
PF03870	RNA polymerase Rpb8	1	1	1
PF03871	RNA polymerase Rpb5, N-terminal domain	1	1	1
PF03874	RNA polymerase Rpb4	2	1	2
PF03876	SHS2 domain found in N terminus of Rpb7p/Rpc25p/MJ0397	2	2	1
PF03878	YIF1	1	1	1
PF03879	Cgr1 family	1	1	1
PF03896	Translocon-associated protein (TRAP), alpha subunit	1	1	1
PF03900	Porphobilinogen deaminase, C-terminal domain	1	1	1
PF03901	Alg9-like mannosyltransferase family	2	4	0.5
PF03908	Sec20	1	1	1
PF03909	BSD domain	2	2	1
PF03911	Sec61beta family	1	1	1
PF03914	CBF/Mak21 family	3	3	1
PF03915	Actin interacting protein 3	1	1	1
PF03917	Eukaryotic glutathione synthase, ATP binding domain	2	2	1
PF03919	mRNA capping enzyme, C-terminal domain	1	1	1
PF03920	Groucho/TLE N-terminal Q-rich domain	1	3	0.333333
PF03931	Skp1 family, tetramerisation domain	2	2	1
PF03932	CutC family	1	1	1
PF03937	Flavinator of succinate dehydrogenase	1	1	1
PF03939	Ribosomal protein L23, N-terminal domain	1	1	1
PF03941	Inner centromere protein, ARK binding region	1	0	#DIV/0!
PF03942	DTW domain	2	2	1
PF03943	TAP C-terminal domain	2	3	0.666667
PF03946	Ribosomal protein L11, N-terminal domain	2	2	1
PF03947	Ribosomal Proteins L2, C-terminal domain	2	2	1
PF03949	Malic enzyme, NAD binding domain	2	2	1
PF03950	tRNA synthetases class I (E and Q), anti-codon binding domain	2	2	1
PF03951	Glutamine synthetase, beta-Grasp domain	1	1	1
PF03952	Enolase, N-terminal domain	2	2	1
PF03953	Tubulin C-terminal domain	13	14	0.928571
PF03957	Jun-like transcription factor	1	1	1
PF03959	Serine hydrolase (FSH1)	1	1	1
PF03962	Mnd1 family	1	1	1
PF03966	Trm112p-like protein	1	1	1
PF03969	AFG1-like ATPase	1	1	1
PF03980	Nnf1	1	1	1
PF03981	Ubiquinol-cytochrome C chaperone	1	1	1
PF03982	Diacylglycerol acyltransferase	1	1	1
PF03985	Paf1	1	1	1
PF03986	Autophagocytosis associated protein (Atg3), N-terminal domain	1	1	1
PF03987	Autophagocytosis associated protein, active-site domain	2	2	1
PF03997	VPS28 protein	1	1	1
PF03998	Utp11 protein	1	1	1
PF04000	Sas10/Utp3/C1D family	3	3	1
PF04003	Dip2/Utp12 Family	3	3	1
PF04004	Leo1-like protein	1	1	1
PF04005	Hus1-like protein	0	1	0
PF04006	Mpp10 protein	1	1	1
PF04031	Las1-like	1	1	1
PF04032	RNAse P Rpr2/Rpp21/SNM1 subunit domain	1	1	1
PF04034	Ribosome biogenesis protein, C-terminal	1	1	1
PF04037	Domain of unknown function (DUF382)	1	1	1
PF04042	DNA polymerase alpha/epsilon subunit B	4	4	1
PF04045	Arp2/3 complex, 34 kD subunit p34-Arc	0	1	0
PF04046	PSP	2	2	1
PF04048	Sec8 exocyst complex component specific domain	1	1	1
PF04049	Anaphase promoting complex subunit 8 / Cdc23	1	1	1
PF04050	Up-frameshift suppressor 2	1	1	1
PF04051	Transport protein particle (TRAPP) component	2	3	0.666667
PF04053	Coatomer WD associated region	2	2	1
PF04054	CCR4-Not complex component, Not1	1	1	1
PF04055	Radical SAM superfamily	4	5	0.8
PF04056	Ssl1-like	1	1	1
PF04057	Replication factor-A protein 1, N-terminal domain	1	1	1
PF04062	ARP2/3 complex ARPC3 (21 kDa) subunit	1	1	1
PF04063	Domain of unknown function (DUF383)	1	1	1
PF04064	Domain of unknown function (DUF384)	1	1	1
PF04065	Not1 N-terminal domain, CCR4-Not complex component	1	1	1
PF04068	Possible Fer4-like domain in RNase L inhibitor, RLI	2	2	1
PF04072	Leucine carboxyl methyltransferase	1	1	1
PF04078	Cell differentiation family, Rcd1-like	1	1	1
PF04080	Per1-like family	1	1	1
PF04083	Partial alpha/beta-hydrolase lipase region	2	3	0.666667
PF04084	Origin recognition complex subunit 2	1	1	1
PF04086	Signal recognition particle, alpha subunit, N-terminal	1	1	1
PF04087	Domain of unknown function (DUF389)	1	0	#DIV/0!
PF04088	Peroxin 13, N-terminal region	1	1	1
PF04089	BRICHOS domain	1	1	1
PF04091	Exocyst complex subunit Sec15-like	1	1	1
PF04096	Nucleoporin autopeptidase	1	1	1
PF04097	Nup93/Nic96	1	1	1
PF04099	Sybindin-like family	2	2	1
PF04100	Vps53-like, N-terminal	1	1	1
PF04101	Glycosyltransferase family 28 C-terminal domain	1	1	1
PF04103	CD20-like family	1	1	1
PF04104	Eukaryotic and archaeal DNA primase, large subunit	2	3	0.666667
PF04106	Autophagy protein Apg5	1	1	1
PF04109	Autophagy protein Apg9	1	1	1
PF04110	Ubiquitin-like autophagy protein Apg12	1	1	1
PF04111	Autophagy protein Apg6	1	1	1
PF04112	Mak10 subunit, NatC N(alpha)-terminal acetyltransferase	1	1	1
PF04113	Gpi16 subunit, GPI transamidase component	1	1	1
PF04114	Gaa1-like, GPI transamidase component	1	1	1
PF04116	Fatty acid hydroxylase superfamily	3	3	1
PF04117	Mpv17 / PMP22 family	5	6	0.833333
PF04118	Dopey, N-terminal	1	1	1
PF04121	Nuclear pore protein 84 / 107	1	1	1
PF04124	Dor1-like family	1	1	1
PF04127	DNA / pantothenate metabolism flavoprotein	1	1	1
PF04129	Vps52 / Sac2 family	1	1	1
PF04130	Spc97 / Spc98 family	5	5	1
PF04133	Vacuolar protein sorting 55	1	1	1
PF04135	Nucleolar RNA-binding protein, Nop10p family	0	1	0
PF04136	Sec34-like family	0	1	0
PF04137	Endoplasmic Reticulum Oxidoreductin 1 (ERO1)	1	1	1
PF04139	Rad9	0	1	0
PF04140	Isoprenylcysteine carboxyl methyltransferase (ICMT) family	1	1	1
PF04142	Nucleotide-sugar transporter	3	3	1
PF04144	SCAMP family	1	1	1
PF04145	Ctr copper transporter family	2	3	0.666667
PF04146	YT521-B-like domain	2	2	1
PF04147	Nop14-like family	1	1	1
PF04152	Mre11 DNA-binding presumed domain	0	1	0
PF04153	NOT2 / NOT3 / NOT5 family	2	2	1
PF04157	EAP30/Vps36 family	2	2	1
PF04158	Sof1-like domain	1	1	1
PF04161	Arv1-like family	1	1	1
PF04176	TIP41-like family	0	1	0
PF04177	TAP42-like family	1	1	1
PF04178	Got1/Sft2-like family	3	3	1
PF04180	Low temperature viability protein	1	1	1
PF04181	Rtr1/RPAP2 family	1	1	1
PF04182	B-block binding subunit of TFIIIC	1	1	1
PF04184	ST7 protein	1	1	1
PF04188	Mannosyltransferase (PIG-V)	0	1	0
PF04189	Gcd10p family	0	1	0
PF04190	Protein of unknown function (DUF410)	1	1	1
PF04192	Utp21 specific WD40 associated putative domain	1	1	1
PF04193	PQ loop repeat	4	4	1
PF04194	Programmed cell death protein 2, C-terminal putative domain	2	2	1
PF04201	Tumour protein D52 family	1	1	1
PF04209	homogentisate 1,2-dioxygenase	1	1	1
PF04212	MIT (microtubule interacting and transport) domain	3	3	1
PF04218	CENP-B N-terminal DNA-binding domain	3	3	1
PF04227	Indigoidine synthase A like protein	1	1	1
PF04241	Protein of unknown function (DUF423)	1	1	1
PF04258	Signal peptide peptidase	2	2	1
PF04263	Thiamin pyrophosphokinase, catalytic domain	1	1	1
PF04265	Thiamin pyrophosphokinase, vitamin B1 binding domain	1	1	1
PF04266	ASCH domain	1	1	1
PF04275	Phosphomevalonate kinase	1	1	1
PF04280	Tim44-like domain	2	2	1
PF04281	Mitochondrial import receptor subunit Tom22	1	1	1
PF04300	F-box associated region	1	1	1
PF04376	Arginine-tRNA-protein transferase, N terminus	1	1	1
PF04377	Arginine-tRNA-protein transferase, C terminus	1	1	1
PF04379	ApaG domain	1	1	1
PF04387	Protein tyrosine phosphatase-like protein, PTPLA	2	2	1
PF04388	Hamartin protein	1	1	1
PF04389	Peptidase family M28	5	5	1
PF04406	Type IIB DNA topoisomerase	1	1	1
PF04408	Helicase associated domain (HA2)	14	14	1
PF04410	Gar1/Naf1 RNA binding region	2	2	1
PF04418	Domain of unknown function (DUF543)	1	1	1
PF04419	4F5 protein family	1	2	0.5
PF04420	CHD5-like protein	1	1	1
PF04421	Mss4 protein	1	1	1
PF04423	Rad50 zinc hook motif	1	1	1
PF04427	Brix domain	5	5	1
PF04430	Protein of unknown function (DUF498/DUF598)	1	1	1
PF04433	SWIRM domain	2	3	0.666667
PF04437	RINT-1 / TIP-1 family	1	1	1
PF04438	HIT zinc finger	3	4	0.75
PF04442	Cytochrome c oxidase assembly protein CtaG/Cox11	1	1	1
PF04446	tRNAHis guanylyltransferase	1	1	1
PF04488	Glycosyltransferase sugar-binding region containing DXD motif	2	4	0.5
PF04494	WD40 associated region in TFIID subunit, NTD2 domain	1	2	0.5
PF04495	GRASP55/65 PDZ-like domain	1	1	1
PF04499	SIT4 phosphatase-associated protein	1	1	1
PF04500	FLYWCH zinc finger domain	1	2	0.5
PF04502	Family of unknown function (DUF572)	2	2	1
PF04503	Single-stranded DNA binding protein, SSDP	1	1	1
PF04506	Rft protein	1	1	1
PF04511	Der1-like family	2	2	1
PF04515	Plasma-membrane choline transporter	2	2	1
PF04516	CP2 transcription factor	2	2	1
PF04547	Calcium-activated chloride channel	3	3	1
PF04557	Glutaminyl-tRNA synthetase, non-specific RNA binding region part 2	1	1	1
PF04558	Glutaminyl-tRNA synthetase, non-specific RNA binding region part 1	1	1	1
PF04560	RNA polymerase Rpb2, domain 7	3	3	1
PF04561	RNA polymerase Rpb2, domain 2	2	3	0.666667
PF04563	RNA polymerase beta subunit	2	3	0.666667
PF04564	U-box domain	5	5	1
PF04565	RNA polymerase Rpb2, domain 3	2	3	0.666667
PF04566	RNA polymerase Rpb2, domain 4	1	2	0.5
PF04567	RNA polymerase Rpb2, domain 5	1	2	0.5
PF04568	Mitochondrial ATPase inhibitor, IATP	1	1	1
PF04571	lipin, N-terminal conserved region	1	1	1
PF04572	Alpha 1,4-glycosyltransferase conserved region	2	2	1
PF04573	Signal peptidase subunit	1	1	1
PF04577	Protein of unknown function (DUF563)	1	1	1
PF04587	ADP-specific Phosphofructokinase/Glucokinase conserved region	1	1	1
PF04588	Hypoxia induced protein conserved region	2	1	2
PF04592	Selenoprotein P, N terminal region	1	1	1
PF04597	Ribophorin I	0	1	0
PF04614	Pex19 protein family	1	1	1
PF04615	Utp14 protein	1	1	1
PF04627	Mitochondrial ATP synthase epsilon chain	0	1	0
PF04628	Sedlin, N-terminal conserved region	2	2	1
PF04636	PA26 p53-induced protein (sestrin)	1	1	1
PF04641	Rtf2 RING-finger	2	2	1
PF04652	Vta1 like	1	1	1
PF04658	TAFII55 protein conserved region	1	1	1
PF04666	N-Acetylglucosaminyltransferase-IV (GnT-IV) conserved region	1	1	1
PF04667	cAMP-regulated phosphoprotein/endosulfine conserved region	1	1	1
PF04668	Twisted gastrulation (Tsg) protein conserved region	1	1	1
PF04669	Polysaccharide biosynthesis	1	1	1
PF04670	Gtr1/RagA G protein conserved region	1	2	0.5
PF04675	DNA ligase N terminus	2	3	0.666667
PF04676	Protein similar to CwfJ C-terminus 2	2	2	1
PF04677	Protein similar to CwfJ C-terminus 1	2	2	1
PF04678	Mitochondrial calcium uniporter	1	1	1
PF04679	ATP dependent DNA ligase C terminal region	3	3	1
PF04683	Proteasome complex subunit Rpn13 ubiquitin receptor	1	1	1
PF04695	Peroxisomal membrane anchor protein (Pex14p) conserved region	1	1	1
PF04696	pinin/SDK/memA/ protein conserved region	1	1	1
PF04697	pinin/SDK conserved region	1	1	1
PF04699	ARP2/3 complex 16 kDa subunit (p16-Arc)	1	1	1
PF04707	PRELI-like family	3	3	1
PF04710	Pellino	1	1	1
PF04712	Radial spokehead-like protein	2	2	1
PF04714	BCL7, N-terminal conserver region	1	1	1
PF04716	ETC complex I subunit conserved region	1	1	1
PF04718	Mitochondrial ATP synthase g subunit	1	1	1
PF04719	hTAFII28-like protein conserved region	1	1	1
PF04721	PNGase C-terminal domain, mannose-binding module PAW	1	1	1
PF04722	Ssu72-like protein	1	1	1
PF04724	Glycosyltransferase family 17	0	1	0
PF04727	ELMO/CED-12 family	2	2	1
PF04729	ASF1 like histone chaperone	1	1	1
PF04733	Coatomer epsilon subunit	1	1	1
PF04734	Neutral/alkaline non-lysosomal ceramidase, N-terminal	2	1	2
PF04736	Eclosion hormone	0	1	0
PF04739	5'-AMP-activated protein kinase beta subunit, interaction domain	1	1	1
PF04750	FAR-17a/AIG1-like protein	1	1	1
PF04752	ChaC-like protein	2	2	1
PF04756	OST3 / OST6 family, transporter family	1	2	0.5
PF04757	Pex2 / Pex12 amino terminal region	1	3	0.333333
PF04758	Ribosomal protein S30	1	1	1
PF04762	IKI3 family	1	1	1
PF04774	Hyaluronan / mRNA binding family	1	1	1
PF04777	Erv1 / Alr family	1	2	0.5
PF04784	Protein of unknown function, DUF547	1	1	1
PF04790	Sarcoglycan complex subunit protein	2	2	1
PF04791	LMBR1-like membrane protein	1	2	0.5
PF04799	fzo-like conserved region	1	1	1
PF04800	ETC complex I subunit conserved region	1	1	1
PF04801	Sin-like protein conserved region	1	1	1
PF04802	Component of IIS longevity pathway SMK-1	1	1	1
PF04810	Sec23/Sec24 zinc finger	3	3	1
PF04811	Sec23/Sec24 trunk domain	3	3	1
PF04815	Sec23/Sec24 helical domain	3	3	1
PF04818	RNA polymerase II-binding domain.	4	4	1
PF04821	Timeless protein	1	1	1
PF04824	Conserved region of Rad21 / Rec8 like protein	1	1	1
PF04825	N terminus of Rad21 / Rec8 like protein	2	2	1
PF04831	Popeye protein conserved region	3	2	1.5
PF04836	Interferon-related protein conserved region	1	1	1
PF04840	Vps16, C-terminal region	1	1	1
PF04841	Vps16, N-terminal region	1	1	1
PF04845	PurA ssDNA and RNA-binding protein	1	1	1
PF04847	Calcipressin	1	1	1
PF04849	HAP1 N-terminal conserved region	2	1	2
PF04851	Type III restriction enzyme, res subunit	3	3	1
PF04855	SNF5 / SMARCB1 / INI1	1	1	1
PF04857	CAF1 family ribonuclease	3	3	1
PF04858	TH1 protein	1	1	1
PF04869	Uso1 / p115 like vesicle tethering protein, head region	1	1	1
PF04874	Mak16 protein C-terminal region	1	1	1
PF04880	NUDE protein, C-terminal conserved region	1	1	1
PF04882	Peroxin-3	0	1	0
PF04884	Vitamin B6 photo-protection and homoeostasis	1	1	1
PF04889	Cwf15/Cwc15 cell cycle control protein	1	1	1
PF04893	Yip1 domain	3	3	1
PF04898	Glutamate synthase central domain	1	1	1
PF04900	Fcf1	1	2	0.5
PF04904	NAB conserved region 1 (NCD1)	1	1	1
PF04905	NAB conserved region 2 (NCD2)	1	1	1
PF04906	Tweety	1	1	1
PF04908	SH3-binding, glutamic acid-rich protein	1	1	1
PF04910	Transcriptional repressor TCF25	1	1	1
PF04912	Dynamitin	1	1	1
PF04916	Phospholipase B	1	1	1
PF04921	XAP5, circadian clock regulator	1	1	1
PF04922	DIE2/ALG10 family	1	1	1
PF04923	Ninjurin	1	2	0.5
PF04925	SHQ1 protein	1	1	1
PF04926	Poly(A) polymerase predicted RNA binding domain	1	1	1
PF04928	Poly(A) polymerase central domain	1	1	1
PF04930	FUN14 family	1	1	1
PF04931	DNA polymerase phi	1	1	1
PF04934	MED6 mediator sub complex component	1	1	1
PF04935	Surfeit locus protein 6	1	1	1
PF04938	Survival motor neuron (SMN) interacting protein 1 (SIP1)	1	1	1
PF04939	Ribosome biogenesis regulatory protein (RRS1)	1	1	1
PF04950	40S ribosome biogenesis protein Tsr1 and BMS1 C-terminal	2	2	1
PF04959	Arsenite-resistance protein 2	1	1	1
PF04960	Glutaminase	1	1	1
PF04968	CHORD	1	1	1
PF04969	CS domain	7	6	1.16667
PF04979	Protein phosphatase inhibitor 2 (IPP-2)	1	1	1
PF04981	NMD3 family	1	1	1
PF04983	RNA polymerase Rpb1, domain 3	3	3	1
PF04987	Phosphatidylinositolglycan class N (PIG-N)	1	1	1
PF04990	RNA polymerase Rpb1, domain 7	1	1	1
PF04991	LicD family	1	1	1
PF04992	RNA polymerase Rpb1, domain 6	1	1	1
PF04997	RNA polymerase Rpb1, domain 1	3	3	1
PF04998	RNA polymerase Rpb1, domain 5	3	3	1
PF05000	RNA polymerase Rpb1, domain 4	3	3	1
PF05002	SGS domain	1	1	1
PF05004	Interferon-related developmental regulator (IFRD)	1	1	1
PF05005	Janus/Ocnus family (Ocnus)	1	1	1
PF05007	Mannosyltransferase (PIG-M)	1	1	1
PF05008	Vesicle transport v-SNARE protein N-terminus	1	1	1
PF05010	Transforming acidic coiled-coil-containing protein (TACC)	1	1	1
PF05011	Lariat debranching enzyme, C-terminal domain	1	1	1
PF05018	Protein of unknown function (DUF667)	3	3	1
PF05019	Coenzyme Q (ubiquinone) biosynthesis protein Coq4	1	1	1
PF05020	NPL4 family, putative zinc binding region	1	1	1
PF05021	NPL4 family	2	1	2
PF05022	SRP40, C-terminal domain	1	1	1
PF05024	N-acetylglucosaminyl transferase component (Gpi1)	1	1	1
PF05026	Dcp2, box A domain	1	1	1
PF05028	Poly (ADP-ribose) glycohydrolase (PARG)	2	2	1
PF05029	Timeless protein C terminal region	1	1	1
PF05030	SSXT protein (N-terminal region)	1	1	1
PF05033	Pre-SET motif	3	4	0.75
PF05041	Pecanex protein (C-terminus)	1	1	1
PF05044	Homeo-prospero domain	2	1	2
PF05046	Mitochondrial large subunit ribosomal protein (Img2)	1	1	1
PF05047	Mitochondrial ribosomal protein L51 / S25 / CI-B8 domain	3	3	1
PF05048	Periplasmic copper-binding protein (NosD)	1	1	1
PF05050	Methyltransferase FkbM domain	1	1	1
PF05051	Cytochrome C oxidase copper chaperone (COX17)	1	1	1
PF05053	Menin	1	1	1
PF05057	Putative serine esterase (DUF676)	1	1	1
PF05060	N-acetylglucosaminyltransferase II (MGAT2)	1	1	1
PF05063	MT-A70	3	3	1
PF05064	Nsp1-like C-terminal region	1	1	1
PF05071	NADH ubiquinone oxidoreductase subunit NDUFA12	1	2	0.5
PF05076	Suppressor of fused protein (SUFU)	1	1	1
PF05089	Alpha-N-acetylglucosaminidase (NAGLU) tim-barrel domain	1	1	1
PF05090	Vitamin K-dependent gamma-carboxylase	1	1	1
PF05091	Eukaryotic translation initiation factor 3 subunit 7 (eIF-3)	1	1	1
PF05093	Cytokine-induced anti-apoptosis inhibitor 1, Fe-S biogenesis	1	1	1
PF05110	AF-4 proto-oncoprotein	1	1	1
PF05127	Helicase	1	1	1
PF05129	Transcription elongation factor Elf1 like	1	1	1
PF05131	Pep3/Vps18/deep orange family	1	1	1
PF05132	RNA polymerase III RPC4	1	1	1
PF05147	Lanthionine synthetase C-like protein	1	1	1
PF05148	Hypothetical methyltransferase	1	1	1
PF05153	Myo-inositol oxygenase	1	1	1
PF05154	TM2 domain	3	4	0.75
PF05158	RNA polymerase Rpc34 subunit	1	1	1
PF05160	DSS1/SEM1 family	1	1	1
PF05161	MOFRL family	2	2	1
PF05162	Ribosomal protein L41	0	1	0
PF05172	Nup53/35/40-type RNA recognition motif	1	1	1
PF05175	Methyltransferase small domain	2	2	1
PF05178	KRI1-like family	1	1	1
PF05179	RNA pol II accessory factor, Cdc73 family, C-terminal	1	1	1
PF05180	DNL zinc finger	0	1	0
PF05181	XPA protein C-terminus	1	1	1
PF05182	Fip1 motif	1	1	1
PF05184	Saposin-like type B, region 1	1	1	1
PF05185	PRMT5 arginine-N-methyltransferase	1	1	1
PF05186	Dpy-30 motif	4	4	1
PF05187	Electron transfer flavoprotein-ubiquinone oxidoreductase, 4Fe-4S	1	1	1
PF05188	MutS domain II	2	3	0.666667
PF05189	RNA 3'-terminal phosphate cyclase (RTC), insert domain	2	2	1
PF05190	MutS family domain IV	2	3	0.666667
PF05191	Adenylate kinase, active site lid	2	2	1
PF05192	MutS domain III	2	4	0.5
PF05193	Peptidase M16 inactive domain	6	8	0.75
PF05195	Aminopeptidase P, N-terminal domain	1	2	0.5
PF05197	TRIC channel	1	1	1
PF05199	GMC oxidoreductase	17	19	0.894737
PF05205	COMPASS (Complex proteins associated with Set1p) component shg1	1	1	1
PF05206	Methyltransferase TRM13	1	1	1
PF05207	CSL zinc finger	1	2	0.5
PF05208	ALG3 protein	0	1	0
PF05210	Sprouty protein (Spry)	2	2	1
PF05216	UNC-50 family	1	1	1
PF05219	DREV methyltransferase	2	1	2
PF05221	S-adenosyl-L-homocysteine hydrolase	2	2	1
PF05222	Alanine dehydrogenase/PNT, N-terminal domain	1	1	1
PF05224	NDT80 / PhoG like DNA-binding family	1	1	1
PF05225	helix-turn-helix, Psq domain	5	8	0.625
PF05236	Transcription initiation factor TFIID component TAF4 family	1	1	1
PF05250	Uncharacterised protein family (UPF0193)	1	1	1
PF05251	Oligosaccharyltransferase subunit 5	1	1	1
PF05253	U11-48K-like CHHC zinc finger	3	4	0.75
PF05254	Uncharacterised protein family (UPF0203)	2	1	2
PF05255	Uncharacterised protein family (UPF0220)	1	1	1
PF05276	SH3 domain-binding protein 5 (SH3BP5)	2	2	1
PF05281	Neuroendocrine protein 7B2 precursor (Secretogranin V)	1	1	1
PF05282	AAR2 protein	1	1	1
PF05285	SDA1	0	1	0
PF05291	Bystin	1	1	1
PF05292	Malonyl-CoA decarboxylase C-terminal domain	1	1	1
PF05301	GNAT acetyltransferase, Mec-17	1	1	1
PF05303	Protein of unknown function (DUF727)	1	1	1
PF05308	Mitochondrial fission regulator	1	1	1
PF05327	RNA polymerase I specific transcription initiation factor RRN3	1	1	1
PF05328	CybS, succinate dehydrogenase cytochrome B small subunit	1	1	1
PF05334	Protein of unknown function (DUF719)	1	1	1
PF05335	Protein of unknown function (DUF745)	2	2	1
PF05346	Eukaryotic membrane protein family	1	1	1
PF05347	Complex 1 protein (LYR family)	4	4	1
PF05348	Proteasome maturation factor UMP1	0	1	0
PF05350	Glycogen synthase kinase-3 binding	1	0	#DIV/0!
PF05351	GMP-PDE, delta subunit	2	2	1
PF05361	PKC-activated protein phosphatase-1 inhibitor	1	1	1
PF05362	Lon protease (S16) C-terminal proteolytic domain	1	1	1
PF05365	Ubiquinol-cytochrome C reductase, UQCRX/QCR9 like	1	1	1
PF05375	Pacifastin inhibitor (LCMII)	0	1	0
PF05378	Hydantoinase/oxoprolinase N-terminal region	1	1	1
PF05383	La domain	4	5	0.8
PF05404	Translocon-associated protein, delta subunit precursor (TRAP-delta)	1	1	1
PF05405	Mitochondrial ATP synthase B chain precursor (ATP-synt_B)	1	1	1
PF05406	WGR domain	1	1	1
PF05422	Stress-activated map kinase interacting protein 1 (SIN1)	1	1	1
PF05427	Acidic fibroblast growth factor binding (FIBP)	1	1	1
PF05428	Corticotropin-releasing factor binding protein (CRF-BP)	1	1	1
PF05434	TMEM9	0	1	0
PF05439	Jumping translocation breakpoint protein (JTB)	1	1	1
PF05450	Nicastrin	1	1	1
PF05454	Dystroglycan (Dystrophin-associated glycoprotein 1)	1	1	1
PF05456	Eukaryotic translation initiation factor 4E binding protein (EIF4EBP)	1	1	1
PF05458	Cd27 binding protein (Siva)	1	1	1
PF05462	Slime mold cyclic AMP receptor	1	1	1
PF05470	Eukaryotic translation initiation factor 3 subunit 8 N-terminus	1	1	1
PF05473	UL45 protein, carbohydrate-binding C-type lectin-like	0	1	0
PF05478	Prominin	2	2	1
PF05482	Serendipity locus alpha protein (SRY-A)	1	1	1
PF05485	THAP domain	3	8	0.375
PF05486	Signal recognition particle 9 kDa protein (SRP9)	1	1	1
PF05493	ATP synthase subunit H	1	1	1
PF05495	CHY zinc finger	1	1	1
PF05496	Holliday junction DNA helicase ruvB N-terminus	1	1	1
PF05497	Destabilase	1	1	1
PF05499	DNA methyltransferase 1-associated protein 1 (DMAP1)	1	1	1
PF05502	Dynactin p62 family	1	1	1
PF05510	Sarcoglycan alpha/epsilon	1	1	1
PF05511	Mitochondrial ATP synthase coupling factor 6	1	1	1
PF05517	p25-alpha	1	1	1
PF05527	Domain of unknown function (DUF758)	1	1	1
PF05529	B-cell receptor-associated protein 31-like	2	2	1
[truncated: 2,384 more rows]
