# Supplementary material for: A Chromosome-Scale Assembly of the Asian Honeybee Apis cerana Genome
Source: Front Genet. 2020 Mar 27;11:279. doi: 10.3389/fgene.2020.00279 (PMC7119468; doi:10.3389/fgene.2020.00279)
Supplement: TABLE S7 — The list of unique genes in A. cerana and A. mellifera. [file Table_7.XLSX]

## Sheet: Apis mellifera unique genes
Gene	Annatation	KOG	KOG class
rna10910	XP_016767755.2 dynein regulatory complex protein 9 isoform X1 [Apis mellifera]
rna11320	XP_006570320.1 uncharacterized protein LOC100578017 [Apis mellifera]	KOG4628	Posttranslational modification, protein turnover, chaperones
rna11475	XP_001122230.1 mitochondrial import inner membrane translocase subunit Tim8 [Apis mellifera]	KOG3489	Intracellular trafficking, secretion, and vesicular transport
rna11528	XP_006560097.1 uncharacterized protein LOC102654206 [Apis mellifera]
rna11696	XP_026297180.1 leucine-rich repeat-containing protein 9-like [Apis mellifera]	KOG1859	General function prediction only
rna11969	XP_006565461.1 uncharacterized protein PFB0145c isoform X1 [Apis mellifera]	KOG0243	Cytoskeleton
rna12653	XP_026297034.1 cytochrome b-c1 complex subunit 8-like [Apis mellifera]
rna13208	XP_026297585.1 uncharacterized protein LOC726196 isoform X1 [Apis mellifera]
rna13253	XP_001120054.2 putative peroxisomal biogenesis factor 10 [Apis mellifera]	KOG0317	Posttranslational modification, protein turnover, chaperones
rna13766	NP_001229922.1 odorant receptor 170 [Apis mellifera]
rna13767	XP_006564341.1 uncharacterized protein LOC102654841, partial [Apis mellifera]
rna13768	XP_026297484.1 odorant receptor 22c-like [Apis mellifera]
rna13785	XP_026297790.1 tetratricopeptide repeat protein 37 isoform X1 [Apis mellifera]	KOG1127	RNA processing and modification
rna1386	XP_026300445.1 protamine-like protein [Apis mellifera]
rna14127	XP_026297742.1 uncharacterized protein LOC726661 [Apis mellifera]
rna14135	XP_006568378.2 dynein regulatory complex subunit 3 [Apis mellifera]	KOG1644	RNA processing and modification
rna14290	XP_006569517.1 uncharacterized protein LOC102655858 [Apis mellifera]
rna15386	XP_026298376.1 uncharacterized protein LOC100577711 [Apis mellifera]	KOG4308	Function unknown
rna15761	XP_392763.3 HMG box-containing protein 4 isoform X1 [Apis mellifera]	KOG0527	Transcription
rna15999	XP_026298244.1 mediator of RNA polymerase II transcription subunit 2 isoform X1 [Apis mellifera]
rna16235	XP_026298103.1 zinc finger protein 800 isoform X1 [Apis mellifera]
rna16357	XP_026298046.1 guanine nucleotide-binding protein subunit beta-like protein [Apis mellifera]	KOG0282	Function unknown
rna16393	XP_026297953.1 cytochrome b5-related protein [Apis mellifera]	KOG4232	Lipid transport and metabolism
rna17185	XP_016769595.2 putative uncharacterized protein DDB_G0282499 [Apis mellifera]	KOG4362	Replication, recombination and repair, Transcription
rna17327	XP_003249924.2 uncharacterized protein LOC100576702 [Apis mellifera]
rna17328	XP_001122039.4 uncharacterized protein LOC726288 [Apis mellifera]
rna17457	XP_026298565.1 uncharacterized protein LOC100578400 [Apis mellifera]
rna17621	XP_006617798.1 PREDICTED: oocyte zinc finger protein XlCOF7.1-like [Apis dorsata]	KOG3623	Transcription
rna17795	NP_001127843.1 nicotinamide riboside kinase [Apis mellifera]	KOG3308	Nucleotide transport and metabolism
rna17885	NP_001011588.1 odorant binding protein 5 precursor [Apis mellifera]
rna17886	XP_006567383.1 odorant binding protein 6 isoform X2 [Apis mellifera]
rna17890	NP_001011591.1 odorant binding protein 2 precursor [Apis mellifera]
rna18436	XP_026299080.1 G-protein coupled receptor 54 [Apis mellifera]	KOG4219	Signal transduction mechanisms
rna18678	XP_016770119.1 uncharacterized protein LOC102655156 [Apis mellifera]
rna18768	XP_006565580.1 uncharacterized protein LOC725578 isoform X1 [Apis mellifera]
rna18823	XP_026299147.1 LOW QUALITY PROTEIN: uncharacterized protein LOC100577602 [Apis mellifera]	KOG1810	Cell cycle control, cell division, chromosome partitioning
rna19121	XP_003250799.1 uncharacterized protein LOC100578731 [Apis mellifera]
rna19589	XP_016769957.1 mitochondrial GTPase 1 [Apis mellifera]	KOG2485	General function prediction only
rna19691	XP_026299682.1 nucleoside diphosphate-linked moiety X motif 6 [Apis mellifera]	KOG0648	Signal transduction mechanisms
rna19733	XP_026299687.1 kielin/chordin-like protein [Apis mellifera]
rna198	XP_026301835.1 uncharacterized protein LOC113219395 [Apis mellifera]
rna20549	XP_001120899.3 protein naked cuticle homolog 2-like [Apis mellifera]
rna20836	XP_026299475.1 dynein heavy chain 7, axonemal-like [Apis mellifera]
rna2137	XP_006570705.1 homeobox protein 2-like [Apis mellifera]	KOG4177	Cell wall/membrane/envelope biogenesis
rna21718	XP_026299573.1 GATOR complex protein MIOS-B isoform X1 [Apis mellifera]	KOG1008	Function unknown
rna21920	XP_003251540.1 probable peptide chain release factor C12orf65, mitochondrial [Apis mellifera]	KOG2726	Translation, ribosomal structure and biogenesis
rna22407	XP_016771060.1 protein penguin [Apis mellifera]	KOG2050	Translation, ribosomal structure and biogenesis
rna22581	XP_016770832.2 odorant binding protein 12 isoform X1 [Apis mellifera]
rna22615	XP_001121507.2 tetraspanin-3 [Apis mellifera]	KOG3882	General function prediction only
rna22684	XP_026300052.1 NADH-cytochrome b5 reductase-like isoform X1 [Apis mellifera]	KOG0534	Coenzyme transport and metabolism, Energy production and conversion
rna23236	XP_026300422.1 odorant receptor 30a-like [Apis mellifera]
rna23239	XP_026300419.1 uncharacterized protein LOC102656271 isoform X1 [Apis mellifera]
rna23305	XP_026300573.1 putative gustatory receptor 28a [Apis mellifera]
rna23673	XP_026300424.1 mucin-2-like [Apis mellifera]	KOG4157	Carbohydrate transport and metabolism, Posttranslational modification, protein turnover, chaperones
rna23678	XP_016771366.1 uncharacterized protein LOC107965436 [Apis mellifera]
rna23679	XP_026300642.1 uncharacterized protein LOC113218541 [Apis mellifera]
rna24153	XP_026300582.1 RNA-binding protein 25-like [Apis mellifera]
rna24347	XP_006557598.1 cuticular protein isoform X1 [Apis mellifera]
rna24842	XP_016771536.1 homeobox protein engrailed-2-B [Apis mellifera]	KOG0492	General function prediction only
rna24863	XP_016771816.1 uncharacterized protein LOC107965532 [Apis mellifera]
rna25125	XP_006563008.1 tRNA (cytosine(38)-C(5))-methyltransferase [Apis mellifera]	KOG0919	Transcription
rna25209	XP_396750.5 lysophospholipid acyltransferase 7 [Apis mellifera]	KOG2706	Function unknown
rna25604	XP_001122875.1 eukaryotic translation initiation factor 3 subunit F-like [Apis mellifera]
rna25768	XP_392920.1 baculoviral IAP repeat-containing protein 5 [Apis mellifera]	KOG1101	Cell cycle control, cell division, chromosome partitioning, General function prediction only
rna26467	XP_393172.2 uncharacterized protein LOC409674 isoform X1 [Apis mellifera]
rna26502	XP_006563415.1 cysteine-rich venom protein 1 isoform X1 [Apis mellifera]
rna26529	XP_006563431.1 AN1-type zinc finger protein 1 [Apis mellifera]	KOG3183	General function prediction only
rna26837	XP_006563576.1 NADH dehydrogenase [ubiquinone] 1 alpha subcomplex assembly factor 2 [Apis mellifera]
rna28021	NP_001035360.1 allergen Api m 6.03 / Api m 6.04 precursor [Apis mellifera]
rna28079	XP_026301643.1 uncharacterized protein LOC551685 isoform X2 [Apis mellifera]	KOG0198	Signal transduction mechanisms
rna28250	XP_026301767.1 uncharacterized protein LOC113219362 [Apis mellifera]
rna28278	XP_026301771.1 uncharacterized protein LOC102656085 [Apis mellifera]
rna28280	XP_026301773.1 E3 ubiquitin-protein ligase RNF165-like [Apis mellifera]	KOG4628	Posttranslational modification, protein turnover, chaperones
rna28282	XP_026301774.1 E3 ubiquitin-protein ligase RNF165-like [Apis mellifera]	KOG4628	Posttranslational modification, protein turnover, chaperones
rna314	XP_026301310.1 translation initiation factor eIF-2B subunit epsilon [Apis mellifera]	KOG1461	Translation, ribosomal structure and biogenesis
rna3143	XP_016771708.1 tRNA (guanine-N(7)-)-methyltransferase non-catalytic subunit WDR4 [Apis mellifera]	KOG3914	Function unknown
rna3370	XP_006571598.1 uncharacterized protein LOC725724 isoform X1 [Apis mellifera]	KOG1052	Inorganic ion transport and metabolism, Amino acid transport and metabolism, Signal transduction mechanisms
rna3497	NP_001072129.1 chemosensory protein 5 precursor [Apis mellifera]
rna3628	XP_003251791.2 peritrophin-1 [Apis mellifera]
rna3710	XP_001122830.2 uncharacterized protein LOC727116 [Apis mellifera]
rna3712	XP_001122332.1 sentrin-specific protease 8 [Apis mellifera]	KOG3246	General function prediction only
rna3722	XP_026294924.1 peptidyl-prolyl cis-trans isomerase NIMA-interacting 4 isoform X1 [Apis mellifera]	KOG3258	Posttranslational modification, protein turnover, chaperones
rna3797	XP_006572180.1 piggyBac transposable element-derived protein 4 [Apis mellifera]
rna3935	XP_006557710.2 uncharacterized protein LOC102654576 [Apis mellifera]
rna4716	XP_006565907.2 apoptotic protease-activating factor 1-like isoform X1 [Apis mellifera]	KOG4658	Signal transduction mechanisms
rna4996	XP_016920100.1 protamine-like [Apis cerana]
rna5078	XP_006569035.1 probable RNA-binding protein EIF1AD isoform X1 [Apis mellifera]	KOG2925	Translation, ribosomal structure and biogenesis
rna5308	NP_001193395.1 glutathione S-transferase C-terminal domain-containing protein [Apis mellifera]	KOG2811	Function unknown
rna577	XP_026302048.1 sodium channel protein Nach [Apis mellifera]	KOG4294	Inorganic ion transport and metabolism, Signal transduction mechanisms
rna6035	XP_026295504.1 uncharacterized protein LOC100577743 [Apis mellifera]
rna606	XP_006562581.1 uncharacterized protein LOC551443 isoform X1 [Apis mellifera]	KOG1113	Signal transduction mechanisms
rna6625	XP_016766900.1 THO complex subunit 6 homolog [Apis mellifera]	KOG0649	General function prediction only
rna7026	XP_016766963.1 uncharacterized protein LOC725359 [Apis mellifera]	KOG4294	Inorganic ion transport and metabolism, Signal transduction mechanisms
rna7568	XP_026295147.1 uncharacterized protein LOC113218616 [Apis mellifera]
rna7752	XP_026296053.1 uncharacterized protein LOC107965775 [Apis mellifera]
rna8050	NP_001078815.1 apidermin 2 precursor [Apis mellifera]
rna8323	XP_001121698.2 trafficking protein particle complex subunit 6B [Apis mellifera]	KOG3316	Intracellular trafficking, secretion, and vesicular transport
rna8341	XP_393324.2 hemK methyltransferase family member 1 [Apis mellifera]	KOG2904	General function prediction only
rna8433	XP_016767367.1 melatonin receptor type 1B-B-like [Apis mellifera]
rna8706	XP_006566002.1 protein dopey homolog PFC0245c [Apis mellifera]
rna8779	XP_026295818.1 putative histone-lysine N-methyltransferase 1, partial [Apis mellifera]
rna8845	XP_016767211.1 EF-hand calcium-binding domain-containing protein 11 [Apis mellifera]	KOG0027	Signal transduction mechanisms
rna9062	XP_006567240.1 probable phenylalanine--tRNA ligase, mitochondrial [Apis mellifera]	KOG2783	Translation, ribosomal structure and biogenesis
rna9357	XP_006569369.2 calponin homology domain-containing protein DDB_G0272472 [Apis mellifera]
rna9489	XP_026296507.1 uncharacterized protein MAL13P1.304 isoform X1 [Apis mellifera]	KOG4376	Function unknown
rna9664	XP_006559843.1 nucleolar protein of 40 kDa [Apis mellifera]	KOG0922	RNA processing and modification
rna9749	XP_006561138.2 uncharacterized protein LOC102654384 [Apis mellifera]
rna9791	XP_016767910.1 Bardet-Biedl syndrome 4 protein homolog isoform X1 [Apis mellifera]	KOG1129	General function prediction only
rna9815	XP_026296555.1 delta(14)-sterol reductase isoform X1 [Apis mellifera]	KOG1435	Lipid transport and metabolism, Signal transduction mechanisms
rna9912	XP_016767959.2 uncharacterized protein LOC102656199 [Apis mellifera]	KOG1710	General function prediction only
rna996	XP_624434.2 zinc finger protein 330 homolog [Apis mellifera]	KOG1832	Cell cycle control, cell division, chromosome partitioning

## Sheet: Apis cerana unique genes
Gene	Length	Product	KEGG Ortholog	KOG	KOG Class
g10094.t1	1065	HIV-1 Vpr-binding protein		KOG1832	Cell cycle control, cell division, chromosome partitioning
g10510.t1	600	trafficking protein particle complex subunit 5-like		KOG3315	Intracellular trafficking, secretion, and vesicular transport
g10576.t1	1662	hypothetical protein
g10579.t1	264	Transposable element Tc3 transposase
g10626.t1	252	hypothetical protein
g10633.t1	225	hypothetical protein
g10635.t1	222	hypothetical protein
g10695.t1	405	hypothetical protein
g10699.t1	831	conserved hypothetical protein
g10718.t1	222	hypothetical protein
g10720.t1	222	hypothetical protein
g10738.t1	459	hypothetical protein
g1137.t1	1257	hypothetical protein
g1190.t1	825	LIM and SH3 domain protein Lasp-like		KOG1702	Cytoskeleton
g1221.t1	3063	Sterol regulatory element-binding protein	K07197	KOG2588	Transcription
g1520.t1	1632	conserved hypothetical protein
g1579.t1	1026	Predicted RNA binding protein, contains KH domain		KOG2113	General function prediction only
g2031.t1	531	transcription initiation factor TFIID subunit 3-like		KOG1973	Chromatin structure and dynamics
g2476.t1	546	RNA polymerase I, large subunit		KOG0262	Transcription
g2510.t1	351	hypothetical protein
g2613.t1	1773	uncharacterized protein LOC100872582		KOG1090	General function prediction only
g2781.t1	5853	conserved hypothetical protein	K10624	KOG0314	Posttranslational modification, protein turnover, chaperones
g2810.t1	366	histone-lysine N-methyltransferase SETMAR-like
g2946.t1	270	conserved hypothetical protein		KOG2408	General function prediction only
g329.t1	243	Predicted ubiquitin-protein ligase/hyperplastic discs protein, HECT superfamily		KOG0943	Posttranslational modification, protein turnover, chaperones
g3521.t1	639	Rho guanine nucleotide exchange factor CDEP		KOG3531	Signal transduction mechanisms
g3724.t1	261	conserved hypothetical protein	K12162	KOG3483	Function unknown
g3804.t1	327	hypothetical protein
g3842.t1	372	hypothetical protein
g3912.t1	528	conserved hypothetical protein
g4498.t1	10404	conserved hypothetical protein
g4834.t1	390	hypothetical protein
g4874.t1	435	conserved hypothetical protein		KOG3598	Transcription
g4876.t1	324	conserved hypothetical protein		KOG3623	Transcription
g5438.t1	264	hypothetical protein
g5786.t1	246	hypothetical protein
g5947.t1	267	hypothetical protein
g607.t1	306	hypothetical protein
g6142.t1	366	conserved hypothetical protein
g6182.t1	750	conserved hypothetical protein	K09237	KOG4441	Signal transduction mechanisms, General function prediction only
g693.t1	483	conserved hypothetical protein
g7023.t1	579	putative piggyBac transposase Uribo1
g7153.t1	276	conserved hypothetical protein
g7454.t1	705	putative zinc finger protein 727-like		KOG3623	Transcription
g7455.t1	549	Longitudinals lacking protein, isoform G		KOG1883	Transcription
g7457.t1	537	hypothetical protein
g7458.t1	465	zinc finger protein 808-like		KOG2462	Transcription
g7459.t1	246	Homeobox transcription factor SIP1		KOG3623	Transcription
g7460.t1	366	hypothetical protein
g7461.t1	1026	zinc finger protein 41-like		KOG3623	Transcription
g7462.t1	282	conserved hypothetical protein		KOG2462	Transcription
g7464.t1	1431	Zinc finger protein		KOG3993	Transcription
g7465.t1	477	Longitudinals lacking protein, isoforms F/I/K/T		KOG2462	Transcription
g7466.t1	441	hypothetical protein
g7517.t1	468	hypothetical protein
g7695.t1	246	conserved hypothetical protein
g7696.t1	1035	DNA replication licensing factor MCM8		KOG1924	Signal transduction mechanisms, Cytoskeleton
g7743.t1	261	hypothetical protein
g7837.t1	846	HIV-1 Vpr-binding protein		KOG1832	Cell cycle control, cell division, chromosome partitioning
g7982.t1	369	conserved hypothetical protein	K15708
g8041.t1	276	hypothetical protein
g8290.t1	309	hypothetical protein
g8794.t1	234	hypothetical protein
g8926.t1	798	conserved hypothetical protein
g8951.t1	756	conserved hypothetical protein
g9341.t1	342	hypothetical protein
g9342.t1	252	hypothetical protein
g9343.t1	402	Thyroid hormone receptor-associated protein complex, subunit TRAP230		KOG3598	Transcription
g9392.t1	1182	lipoma HMGIC fusion partner-like 2 protein-like		KOG4026	Function unknown
g9393.t1	4887	conserved hypothetical protein		KOG3971	Signal transduction mechanisms
g9414.t1	4020	Myosin class II heavy chain		KOG0161	Cytoskeleton
